# Supplementary material for: Control of the molecular packing of chloroboron(iii) and fluoroboron(iii) subnaphthalocyanines by designing peripheral substituents
Source: Royal Society of Chemistry journal article supplement (doi:10.1039/c7ra11104e), 2017-01-01
Supplement: c7ra11104e1.pdf [file c7ra11104e1.pdf]

Electronic Supplementary Information for:

## **Control of molecular packing of chloroboron(III) and fluoroboron(III) subnaphthalocyanines by designing peripheral substituents**

Akuto Takagi and Tadashi Mizutani

Department of Molecular Chemistry and Biochemistry, Faculty of Science and Engineering, Doshisha University, Kyotanabe, Kyoto 610-0321 Japan

### Table of Contents

|          |                                              |
|----------|----------------------------------------------|
| Page S1: | Table of contents                            |
| Page S3  | Figure S1. <sup>1</sup> H NMR of <b>1a</b>   |
| Page S7  | Figure S2 <sup>13</sup> C NMR of <b>1a</b>   |
| Page S8  | Figure S3 <sup>1</sup> H NMR of <b>1b</b>    |
| Page S12 | Figure S4 <sup>13</sup> C NMR of <b>1b</b>   |
| Page S14 | Figure S5 <sup>1</sup> H NMR of <b>1c</b>    |
| Page S15 | Figure S6 <sup>1</sup> H NMR of <b>1d</b>    |
| Page S16 | Figure S7 <sup>1</sup> H NMR of <b>1e</b>    |
| Page S19 | Figure S8. <sup>1</sup> H NMR of <b>1f</b>   |
| Page S20 | Figure S9. <sup>1</sup> H NMR of <b>2a</b>   |
| Page S21 | Figure S10. <sup>1</sup> H NMR of <b>2b</b>  |
| Page S22 | Figure S11. <sup>1</sup> H NMR of <b>2d</b>  |
| Page S25 | Figure S12. <sup>1</sup> H NMR of <b>2e</b>  |
| Page S26 | Figure S13. <sup>1</sup> H NMR of <b>2f</b>  |
| Page S27 | Figure S14. <sup>1</sup> H NMR of <b>2g</b>  |
| Page S28 | Figure S15. <sup>13</sup> C NMR of <b>2g</b> |
| Page S30 | Figure S16. <sup>1</sup> H NMR of <b>13</b>  |
| Page S31 | Figure S17. <sup>1</sup> H NMR of <b>14</b>  |
| Page S32 | Figure S18. <sup>1</sup> H NMR of <b>15</b>  |
| Page S33 | Figure S19.MALDI-TOF mass of <b>1a</b>       |
| Page S35 | Figure S20.MALDI-TOF mass of <b>1b</b>       |
| Page S37 | Figure S21.MALDI-TOF mass of <b>1c</b>       |
| Page S39 | Figure S22.MALDI-TOF mass of <b>1d</b>       |
| Page S41 | Figure S23.MALDI-TOF mass of <b>1e</b>       |

|          |                                                                                                                                                                                                                                              |
|----------|----------------------------------------------------------------------------------------------------------------------------------------------------------------------------------------------------------------------------------------------|
| Page S43 | Figure S24.MALDI-TOF mass of <b>1f</b>                                                                                                                                                                                                       |
| Page S45 | Figure S25.MALDI-TOF mass of <b>2a</b>                                                                                                                                                                                                       |
| Page S47 | Figure S26.MALDI-TOF mass of <b>2b</b>                                                                                                                                                                                                       |
| Page S49 | Figure S27.MALDI-TOF mass of <b>2c</b>                                                                                                                                                                                                       |
| Page S51 | Figure S28.MALDI-TOF mass of <b>2d</b>                                                                                                                                                                                                       |
| Page S53 | Figure S29.MALDI-TOF mass of <b>2e</b>                                                                                                                                                                                                       |
| Page S55 | Figure S30.MALDI-TOF mass of <b>2f</b>                                                                                                                                                                                                       |
| Page S57 | Figure S31.MALDI-TOF mass of <b>2g</b>                                                                                                                                                                                                       |
| Page S59 | Figure S32.MALDI-TOF mass of <b>13</b>                                                                                                                                                                                                       |
| Page S61 | Figure S33.MALDI-TOF mass of <b>14</b>                                                                                                                                                                                                       |
| Page S63 | Figure S34.MALDI-TOF mass of <b>15</b>                                                                                                                                                                                                       |
| Page S65 | Figure S35 HPLC of <b>1a</b>                                                                                                                                                                                                                 |
| Page S66 | Figure S36 HPLC of <b>1b</b>                                                                                                                                                                                                                 |
| Page S67 | Figure S37 HPLC of <b>1c</b>                                                                                                                                                                                                                 |
| Page S68 | Figure S38 HPLC of <b>1d</b>                                                                                                                                                                                                                 |
| Page S69 | Figure S39 HPLC of <b>1e</b>                                                                                                                                                                                                                 |
| Page S70 | Figure S40 HPLC of <b>1f</b>                                                                                                                                                                                                                 |
| Page S71 | Figure S41 HPLC of <b>2a</b>                                                                                                                                                                                                                 |
| Page S72 | Figure S42 HPLC of <b>2b</b>                                                                                                                                                                                                                 |
| Page S73 | Figure S43 HPLC of <b>2c</b>                                                                                                                                                                                                                 |
| Page S74 | Figure S44 HPLC of <b>2d</b>                                                                                                                                                                                                                 |
| Page S75 | Figure S45 HPLC of <b>2e</b>                                                                                                                                                                                                                 |
| Page S76 | Figure S46 HPLC of <b>2f</b>                                                                                                                                                                                                                 |
| Page S77 | Figure S47 HPLC of <b>2g</b>                                                                                                                                                                                                                 |
| Page S78 | Figure S48 XRD of <b>1d</b>                                                                                                                                                                                                                  |
| Page S79 | Figure S49 XRD of <b>1e</b>                                                                                                                                                                                                                  |
| Page S80 | Figure S50 XRD of <b>1f</b>                                                                                                                                                                                                                  |
| Page S81 | Figure S51 Fluorescence spectra of <b>2b</b> , <b>2e</b> , <b>2f</b> , and <b>2g</b> in CH <sub>2</sub> Cl <sub>2</sub> -DMSO (1:1, v/v).<br>Figure S52 Excitation spectra of <b>2b</b> in CH <sub>2</sub> Cl <sub>2</sub> -DMSO (1:1, v/v). |
| Page S82 | Figure S53 Excitation spectra of <b>2e</b> in CH <sub>2</sub> Cl <sub>2</sub> -DMSO (1:1, v/v).                                                                                                                                              |

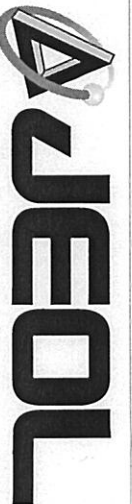

----- PROCESSING PARAMETERS -----  
dc\_balance : 0 : FALSE  
sweep : 0.2 [Hz] : 0.0 [s]  
trapzoids : 0 [%] : 80 [%] : 100 [%]  
zerofill : 1  
fft : 1 : TRUE : TRUE  
machinephase  
ppm

Filename = 20161005hekisin-2.fid  
Author = delta  
Experiment = single\_pulse.ex2  
Sample\_id = #415683  
Solvent = CHLOROFORM-D  
Creation\_time = 5-OCT-2016 10:13:09  
Revision\_time = 7-JUL-2017 18:54:42  
Current\_time = 7-JUL-2017 18:55:04

Comment = single\_pulse  
Data\_format = 1D COMPLEX  
Dim\_size = 13107  
Dim\_title = 1H  
Dim\_units = [ppm]  
Dimensions = X  
Site = ECA500  
Spectrometer = JNM-ECA500

Field\_strength = 11.7473579 [G] (500 [MH  
X\_acq\_duration = 1.74587904 [s]  
X\_domain = 1H  
X\_freq = 500.15991521 [MHz]  
X\_offset = 5.0 [ppm]  
X\_points = 16384  
X\_prescans = 1  
X\_resolution = 0.57277737 [Hz]  
X\_sweep = 9.38438438 [kHz]  
Irr\_domain = 1H  
Irr\_freq = 500.15991521 [MHz]  
Irr\_offset = 5.0 [ppm]  
Irr\_domain = 1H  
Irr\_freq = 500.15991521 [MHz]  
Irr\_offset = 5.0 [ppm]  
Clipped = FALSE  
Mod\_return = 1  
Scans = 8  
Total\_scans = 8

X\_90\_width = 6.24 [us]  
X\_acq\_time = 1.74587904 [s]  
X\_angle = 45 [deg]  
X\_atn = 3.4 [dB]  
X\_pulse = 3.12 [us]  
Irr\_mode = Off  
Irr\_pulse = Off  
Dante\_preset = FALSE  
Initial\_wait = 1 [s]  
Recvr\_gain = 56  
Relaxation\_delay = 5 [s]  
Repetition\_time = 6.74587904 [s]  
Temp\_get = 20.3 [dcl]

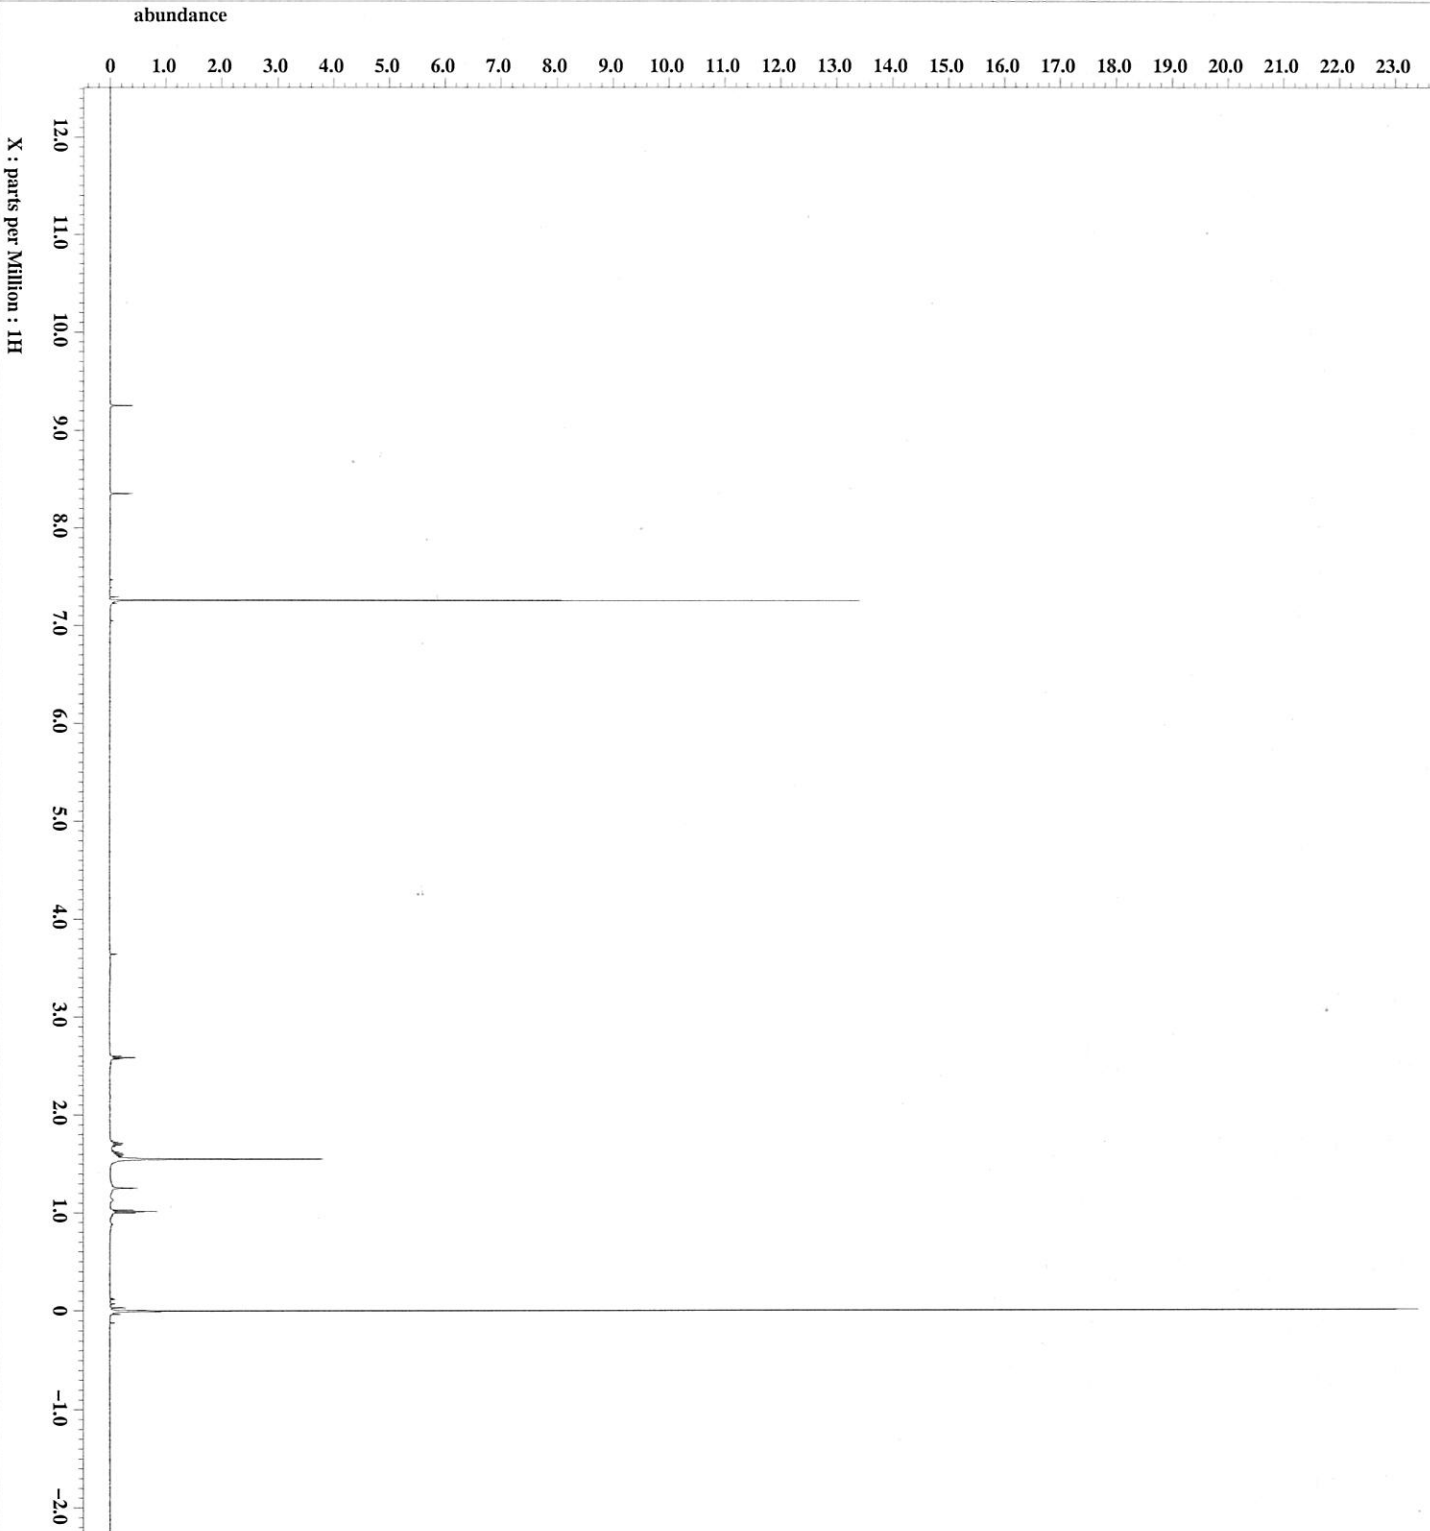

Figure S1. <sup>1</sup>H NMR of 1a.

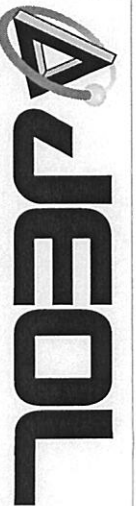

----- PROCESSING PARAMETERS -----  
dc\_balance : 0 : FALSE  
sweep : 0.2 [Hz] : 0.0 [s]  
c1apezoid3 : 0 [%] : 80 [%] : 100 [%]  
zerofill : 1  
ift : 1 : TRUE : TRUE  
machinephase  
ppm

Filename = 20161005hekisin-2.fdf  
Author = delta  
Experiment = single\_pulse.ex2  
Sample\_id = S#415683  
Solvent = CHLOROFORM-D  
Creation\_time = 5-OCT-2016 10:13:09  
Revision\_time = 7-JUL-2017 18:54:42  
Current\_time = 7-JUL-2017 18:55:19

Comment = single\_pulse  
Data\_format = 1D COMPLEX  
Dim\_size = 13107  
Dim\_title = 1H  
Dim\_units = [ppm]  
Dimensions = X  
Site = ECA500  
Spectrometer = JNM-ECA500

Field\_strength = 11.7473579 [T] (500 [MHZ])  
X\_acq\_duration = 1.74587904 [s]  
X\_domain = 1H  
X\_freq = 500.15991521 [MHz]  
X\_offset = 5.01 [ppm]  
X\_points = 16384  
X\_prescans = 1  
X\_resolution = 0.57277737 [Hz]  
X\_sweep = 9.38438438 [kHz]  
Irr\_domain = 1H  
Irr\_freq = 500.15991521 [MHz]  
Irr\_offset = 5.01 [ppm]  
Irr\_domain = 1H  
Irr\_freq = 500.15991521 [MHz]  
Irr\_offset = 5.01 [ppm]  
Mod\_return = FALSE  
Scans = 1  
Recal\_scans = 8

X\_90\_width = 6.24 [us]  
X\_acq\_time = 1.74587904 [s]  
X\_angle = 45 [deg]  
X\_atn = 3.4 [dB]  
X\_pulse = 3.12 [us]  
Irr\_mode = OET  
Irr\_mode = Off  
Dante\_presat = FALSE  
Initial\_wait = 1 [s]  
Recvr\_gain = 56  
Relaxation\_delay = 5 [s]  
Repetition\_time = 6.74587904 [s]  
Temp\_get = 20.3 [dcl]

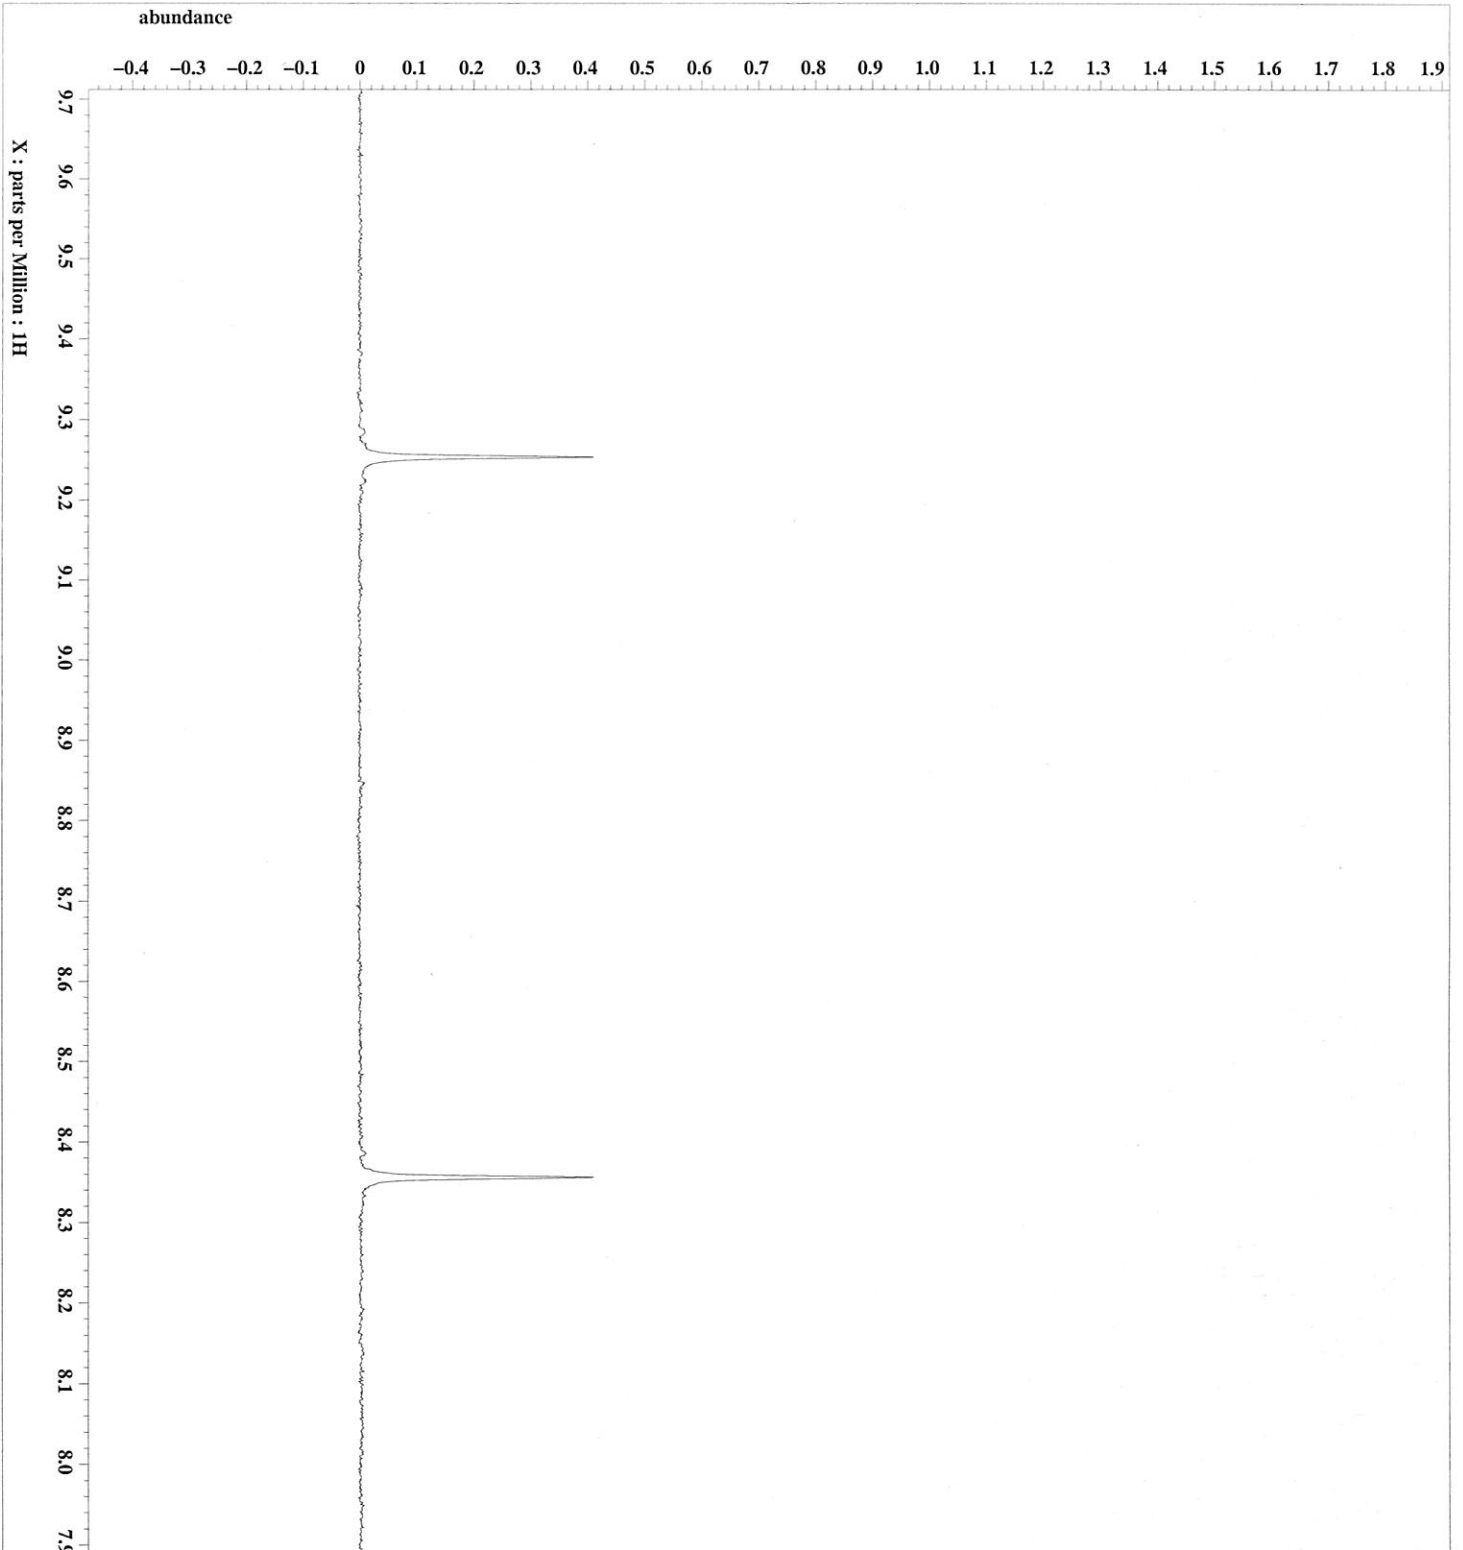

Figure S1. <sup>1</sup>H NMR of **1a** (Low-field region).

```

---- PROCESSING PARAMETERS ----
dc_balance : 0 : FALSE
sweep : 0.2 [Hz] : 0.0 [s]
cpdphase3 : 0 [%] : 80 [%] : 100 [%]
zerofill : 1
fft : 1 : TRUE : TRUE
machinephase
ppm
  
```

```

Filename = 20161005hekisin-2.jdf
Author = delta
Experiment = single_pulse.ex2
Sample_id = S#415683
Solvent = CHLOROFORM-D
Creation_time = 5-OCT-2016 10:13:09
Revision_time = 7-JUL-2017 18:54:42
Current_time = 7-JUL-2017 18:55:43
  
```

```

Comment = single_pulse
Data_format = 1D COMPLEX
Dim_size = 13107
Dim_title = 1H
Dim_units = [ppm]
Dimensions = X
Site = ECA500
Spectrometer = JNM-ECA500
  
```

```

Field_strength = 11.7473579 [T] (500 [MH])
X_acq_duration = 1.74587904 [s]
X_domain = 1H
X_freq = 500.15991521 [MHz]
X_offset = 5.0 [ppm]
X_points = 16384
X_prescans = 1
X_resolution = 1.5727737 [Hz]
X_sweep = 9.38438438 [kHz]
Irr_domain = 1H
Irr_freq = 500.15991521 [MHz]
Irr_offset = 5.0 [ppm]
Irr_domain = 1H
Tri_freq = 500.15991521 [MHz]
Tri_offset = 5.0 [ppm]
Clipped = FALSE
Mod_return = 1
Scans = 1
Total_scans = 8
  
```

```

X_90_width = 6.24 [us]
X_acq_time = 1.74587904 [s]
X_angle = 45 [deg]
X_atn = 3.4 [dB]
X_pulse = 3.12 [us]
Irr_mode = OTE
Tri_mode = Off
Dante_preset = FALSE
Initial_wait = 1 [s]
Recvr_gain = 56
Relaxation_delay = 5 [s]
Repetition_time = 6.74587904 [s]
Temp_get = 20.3 [dc]
  
```

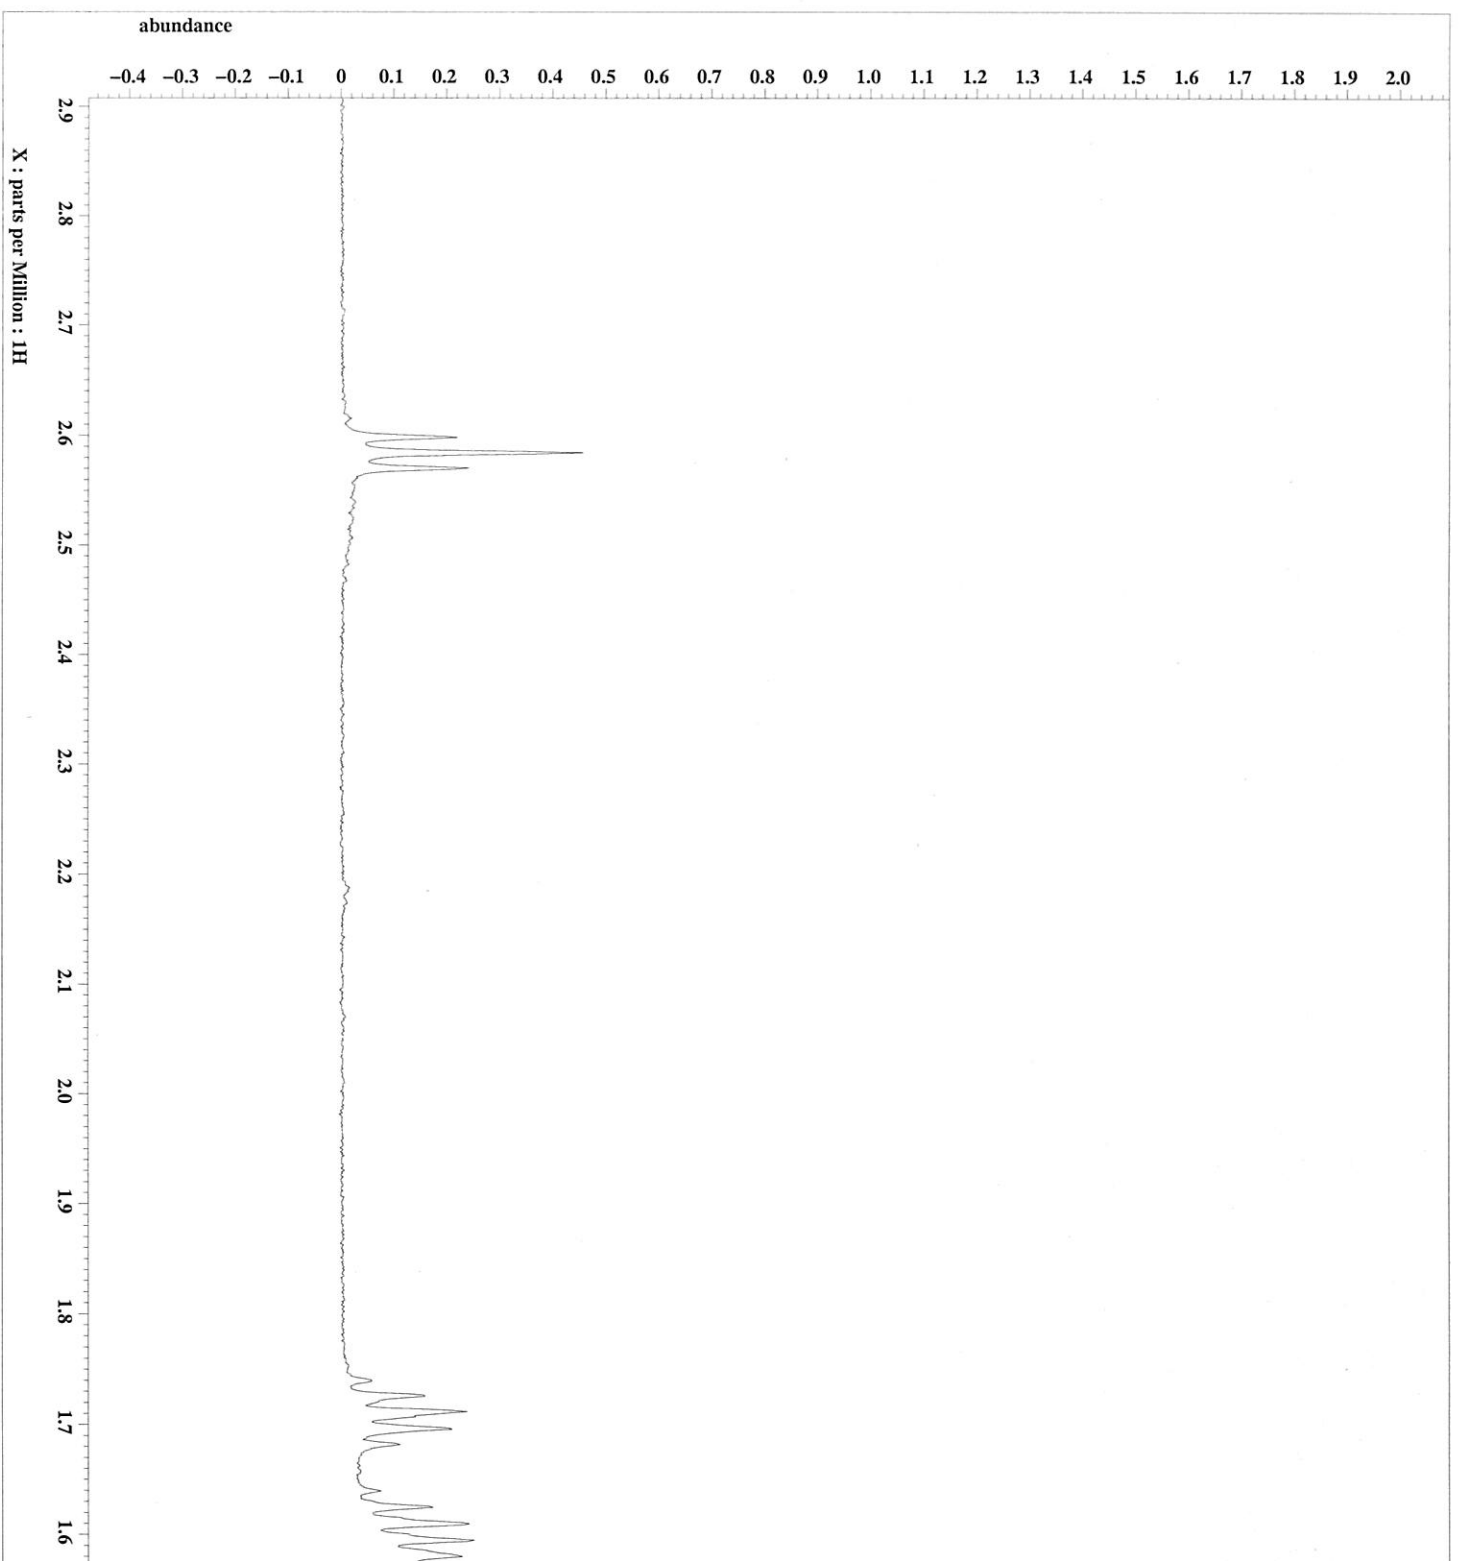

Figure S1. <sup>1</sup>H NMR of **1a** (Up-field region).

```

---- PROCESSING PARAMETERS ----
dc_balance : 0 : FALSE
semp : 0.2 [Hz] : 0.0 [s]
trepzoid3 : 0 [%] : 80 [%] : 100 [%]
zerofill : 1
fft : 1 : TRUE : TRUE
machinephase
ppm
  
```

```

Filename = 20161005hekisin-2.jdf
Author = delta
Experiment = single_pulse.ex2
Sample_id = SH415683
Solvent = CHLOROFORM-D
Creation_time = 5-OCT-2016 10:13:09
Revision_time = 7-JUL-2017 18:54:42
Current_time = 7-JUL-2017 18:56:19
  
```

```

Comment = single_pulse
Data_format = 1D COMPLEX
Dim_size = 13107
Dim_title = 1H
Dim_units = [ppm]
Dimensions = X
Site = ECA500
Spectrometer = JNM-ECA500
  
```

```

Field_strength = 11.7473579 [T] (500 [MH
X_acq_duration = 1.74587904 [s]
X_domain = 1H
X_freq = 500.15991521 [MHz]
X_offset = 5.0 [ppm]
X_points = 16384
X_prescans = 1
X_resolution = 0.57277737 [Hz]
X_sweep = 9.38438438 [kHz]
Irr_domain = 1H
Irr_freq = 500.15991521 [MHz]
Irr_offset = 5.0 [ppm]
Irr_domain = 1H
Tri_domain = 1H
Tri_freq = 500.15991521 [MHz]
Tri_offset = 5.0 [ppm]
Clipped = FALSE
Mod_return = 1
Scans = 8
Total_scans = 8
  
```

```

X_90_width = 6.24 [us]
X_acq_time = 1.74587904 [s]
X_angle = 45 [deg]
X_atn = 3.4 [dB]
X_pulse = 3.12 [us]
Irr_mode = Off
Tri_mode = Off
Dante_preset = FALSE
Initial_wait = 1 [s]
Recvr_gain = 56
Relaxation_delay = 5 [s]
Repetition_time = 6.74587904 [s]
Temp_get = 20.3 [dC]
  
```

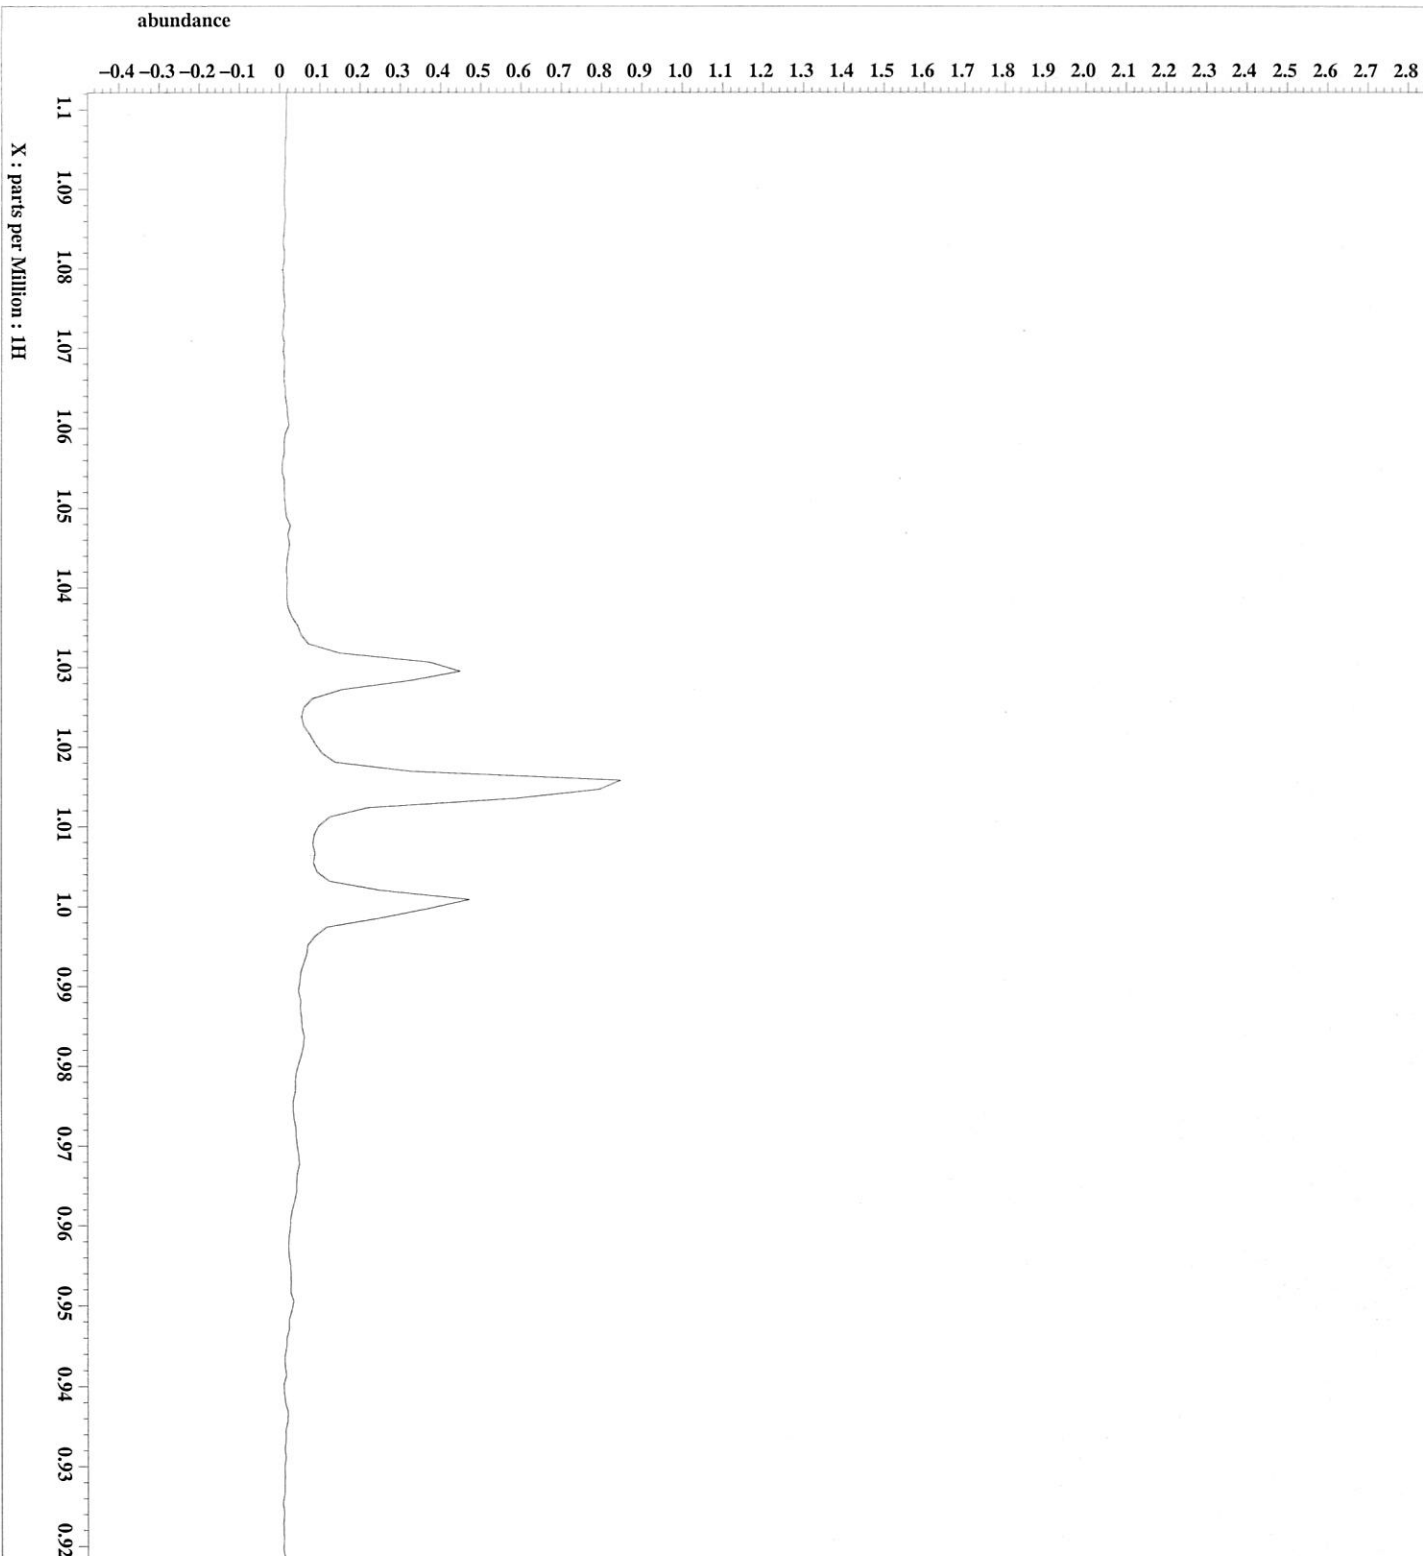

Figure S1. <sup>1</sup>H NMR of **1a** (Low-field region 2).

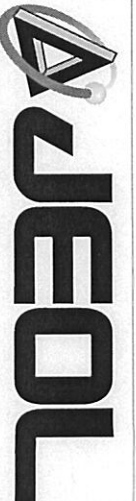

----- PROCESSING PARAMETERS -----  
dc\_balance : 0 : FALSE  
semp : 2.0 [Hz] : 0.0 [s]  
trapzfold3 : 0 [%] : 80 [%] : 100 [%]  
zerofill : 1  
ift : 1 : TRUE : TRUE  
machinephase  
ppm

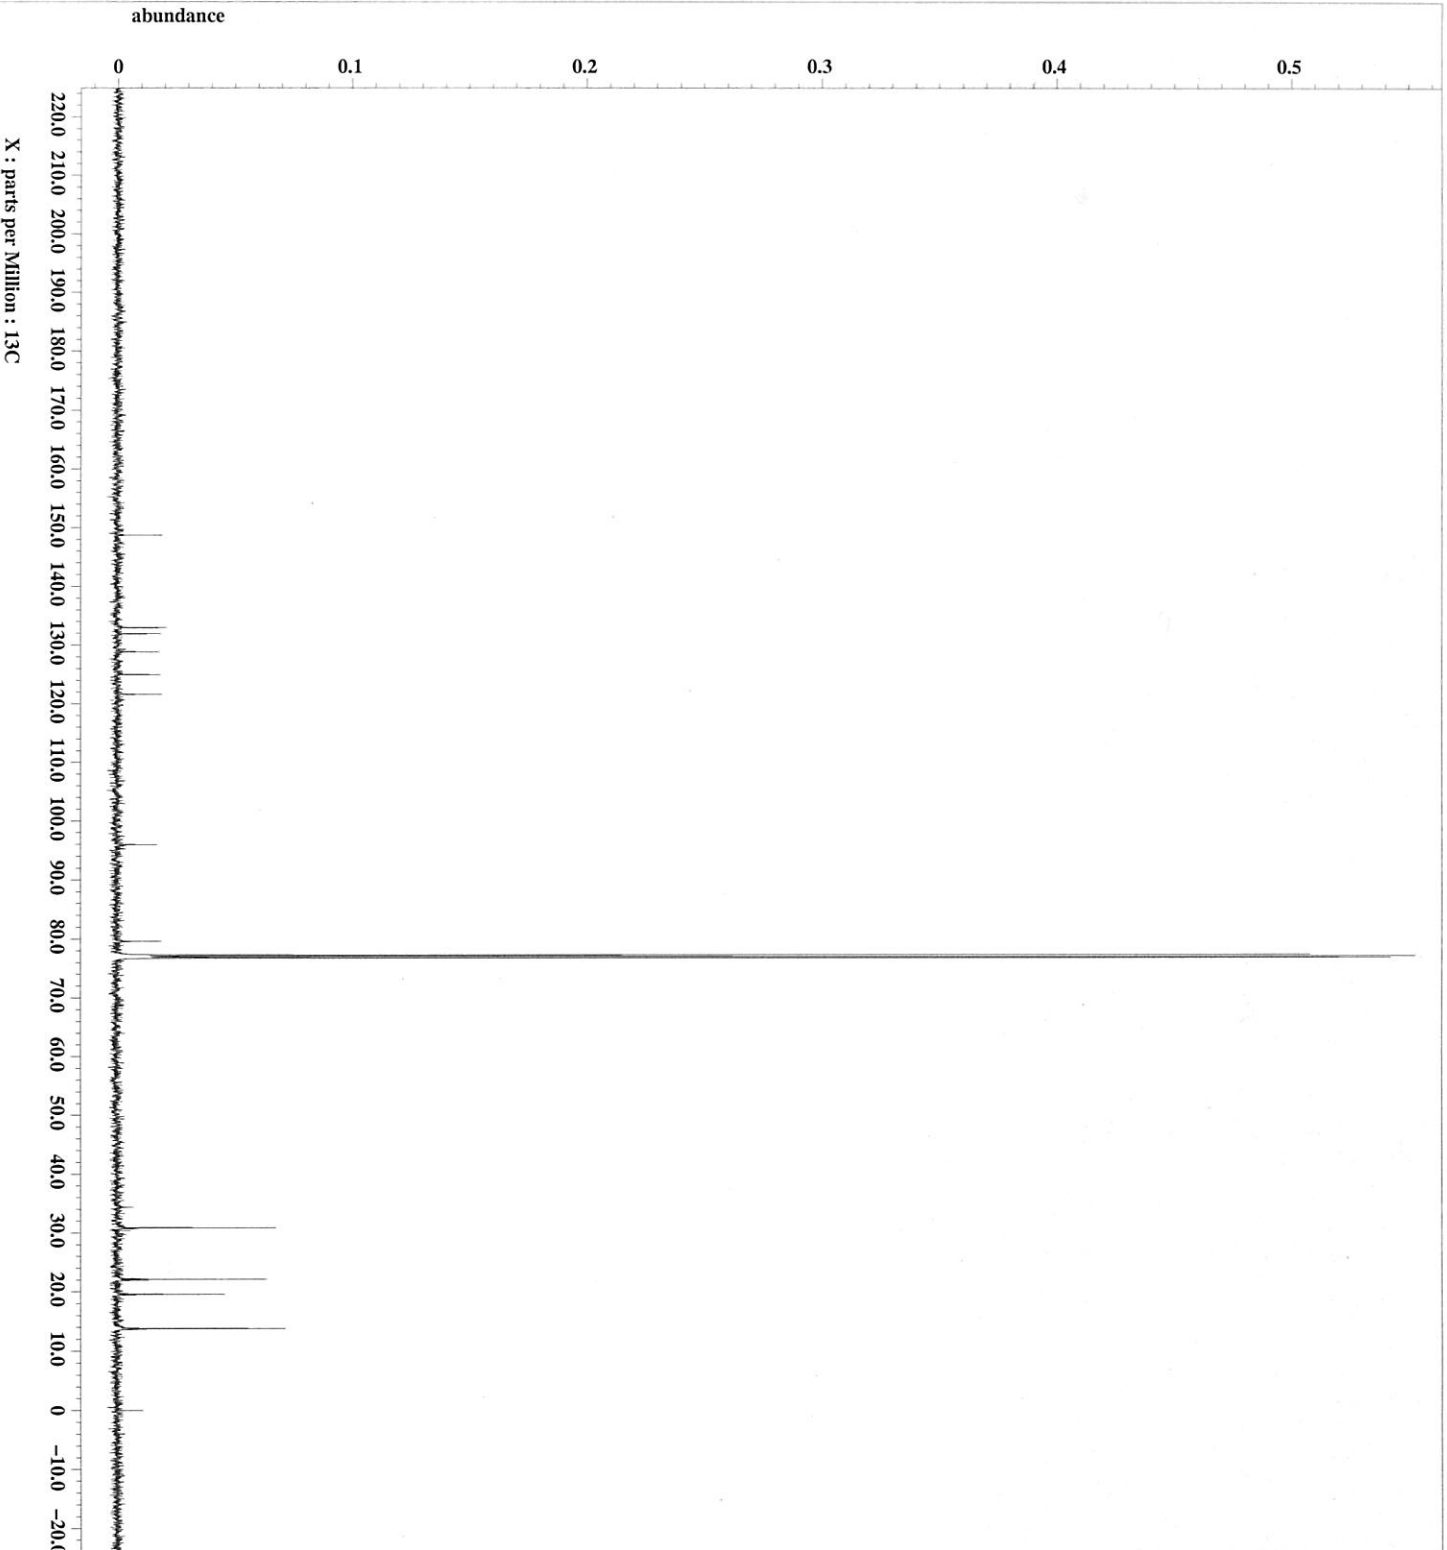

Filename = c4h9-cl13c-2.jdf  
Author = delta  
Experiment = single\_pulse\_dec  
Sample\_id = S#590775  
Solvent = CHLOROFORM-D  
Creation\_time = 24-MAY-2017 15:18:41  
Revision\_time = 7-JUL-2017 18:57:06  
Current\_time = 7-JUL-2017 18:57:15  
Comment = single pulse decouple  
Data\_format = 1D COMPLEX  
Data\_size = 26214  
Dim\_title = 13C  
Dim\_units = [ppm]  
Dimensions = X  
Site = ECA500  
Spectrometer = JNM-ECA500  
Field\_strength = 11.7473579 [T] (500 [MH  
X\_acq\_duration = 0.83361792 [s]  
X\_domain = 13C  
X\_freq = 125.76529768 [MHz]  
X\_offset = 100 [ppm]  
X\_points = 32768  
X\_prescans = 4  
X\_prescan\_resolution = 1.19959034 [Hz]  
X\_sweep\_resolution = 39.3081761 [kHz]  
Irr\_domain = 1H  
Irr\_freq = 500.15991521 [MHz]  
Irr\_offset = 5.0 [ppm]  
Clipped = FALSE  
Mod\_return = 1  
Scans = 800  
Total\_scans = 800  
X\_90\_width = 10.87 [us]  
X\_acq\_time = 0.83361792 [s]  
X\_angle = 30 [deg]  
X\_atn = 6.5 [dB]  
X\_pulse = 3.62333333 [us]  
Irr\_atn\_dec = 26.772 [dB]  
Irr\_atn\_noe = 26.772 [dB]  
Irr\_noise = WALTZ  
Decoupling = TRUE  
Initial\_wait = 1 [s]  
Noe\_time = TRUE  
Noe = 2 [s]  
Recvr\_gain = 52  
Relaxation\_delay = 2 [s]  
Repetition\_time = 2.83361792 [s]  
Temp\_get = 21 [dC]

Figure S2. <sup>13</sup>C NMR of 1a.

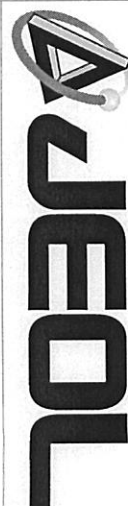

----- PROCESSING PARAMETERS -----  
dc\_balance : 0 : FALSE  
secp : 0.2 [Hz] : 0.0 [s]  
trapzoid3 : 0 [%] : 80 [%] : 100 [%]  
zerofill : 1  
fft : 1 : TRUE : TRUE  
machinephase  
ppm

Filename = 20161005tetra-2.fdf  
Author = delta  
Experiment = single\_pulse.ex2  
Sample\_id = S#407175  
Solvent = CHLOROFORM-D  
Creation\_time = 5-OCT-2016 10:00:18  
Revision\_time = 7-JUL-2017 18:58:52  
Current\_time = 7-JUL-2017 19:00:07

Comment = single\_pulse  
Data\_format = 1D COMPLEX  
Dim\_size = 13107  
Dim\_title = 1H  
Dim\_units = [ppm]  
Dimensions = X  
Spectrometer = ECA500  
Site = JNM-ECA500

Field\_strength = 11.7473579 [T] (500 [MH  
X\_acq\_duration = 1.74587904 [s]  
X\_domain = 1H  
X\_freq = 500.15991521 [MHz]  
X\_offset = 5.0 [ppm]  
X\_points = 16384  
X\_prescans = 1  
X\_resolution = 0.57277737 [Hz]  
X\_sweep = 9.38438438 [Hz]  
Irr\_domain = 1H  
Irr\_freq = 500.15991521 [MHz]  
Irr\_offset = 5.0 [ppm]  
Irr\_domain = 1H  
Tri\_freq = 500.15991521 [MHz]  
Tri\_offset = 5.0 [ppm]  
Clipped = FALSE  
Mod\_return = 1  
Scans = 8  
Total\_scans = 8

X\_90\_width = 6.24 [us]  
X\_acq\_time = 1.74587904 [s]  
X\_angle = 45 [deg]  
X\_atn = 3.4 [dB]  
X\_pulse = 3.12 [us]  
Irr\_mode = Off  
Tri\_mode = Off  
Dante\_presat = FALSE  
Initial\_wait = 1 [s]  
Recvr\_gain = 58  
Relaxation\_delay = 5 [s]  
Repetition\_time = 6.74587904 [s]  
Temp\_set = 20.2 [dC]

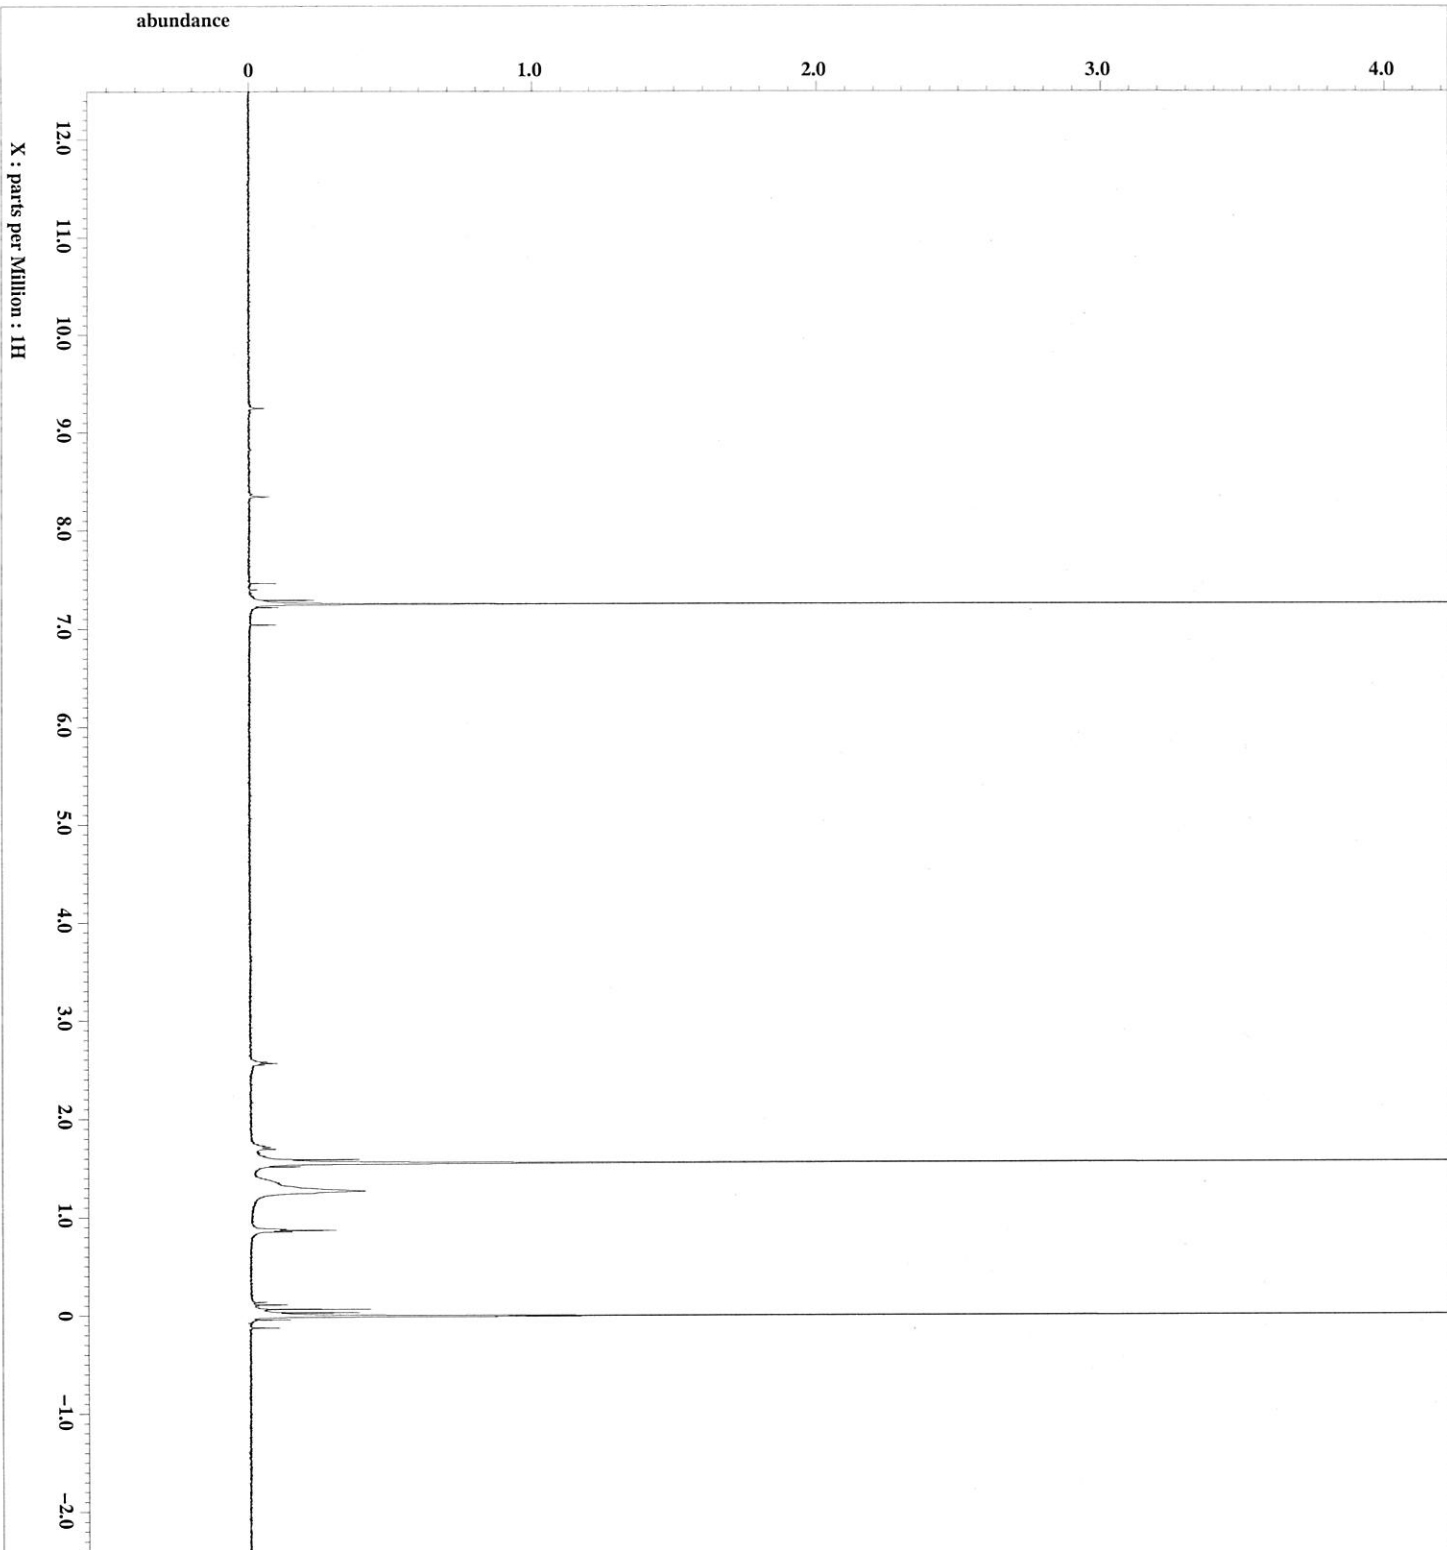

Figure S3. <sup>1</sup>H NMR of **1b**.



```

----- PROCESSING PARAMETERS -----
dc balance : 0 : FALSE
sexp : 0.2[Hz] : 0.0[ms]
trapezoid3 : 0[%] : 80[%] : 100[%]
zerofill : 1
fft : 1 : TRUE : TRUE
machinephase
ppm
  
```

```

Filename = 20161005tetra-2.jdf
Author = delta
Experiment = single_pulse.ex2
Sample_id = S#407175
Solvent = CHLOROFORM-D
Creation_time = 5-OCT-2016 10:00:18
Revision_time = 7-JUL-2017 18:58:52
Current_time = 7-JUL-2017 19:00:21
  
```

```

Comment = single_pulse
Data_format = ID COMPLEX
Dim_size = 13107
Dim_title = 1H
Dim_units = [ppm]
Dimensions = X
Site = ECA500
Spectrometer = JNM-ECA500
  
```

```

Field_strength = 11.747379 [T] (500 [MH
X_acq_duration = 1.74587904 [s]
X_domain = 1H
X_freq = 500.15991521 [MHz]
X_offset = 5.0 [ppm]
X_points = 16384
X_prescans = 1
X_resolution = 0.57277737 [Hz]
X_sweep = 9.38438438 [kHz]
Irr_domain = 1H
Irr_freq = 500.15991521 [MHz]
Irr_offset = 5.0 [ppm]
Tri_domain = 1H
Tri_freq = 500.15991521 [MHz]
Tri_offset = 5.0 [ppm]
Clipped = FALSE
Mod_return = 1
Scans = 8
Total_scans = 8
  
```

```

X_90_width = 6.24 [us]
X_acq_time = 1.74587904 [s]
X_angle = 45 [deg]
X_atn = 3.4 [dB]
X_pulse = 3.12 [us]
Irr_mode = Off
Tri_mode = Off
Dante_preset = FALSE
Initial_wait = 1 [s]
Relaxation_delay = 5 [s]
Repetition_time = 6.74587904 [s]
Temp_get = 20.2 [dc]
  
```

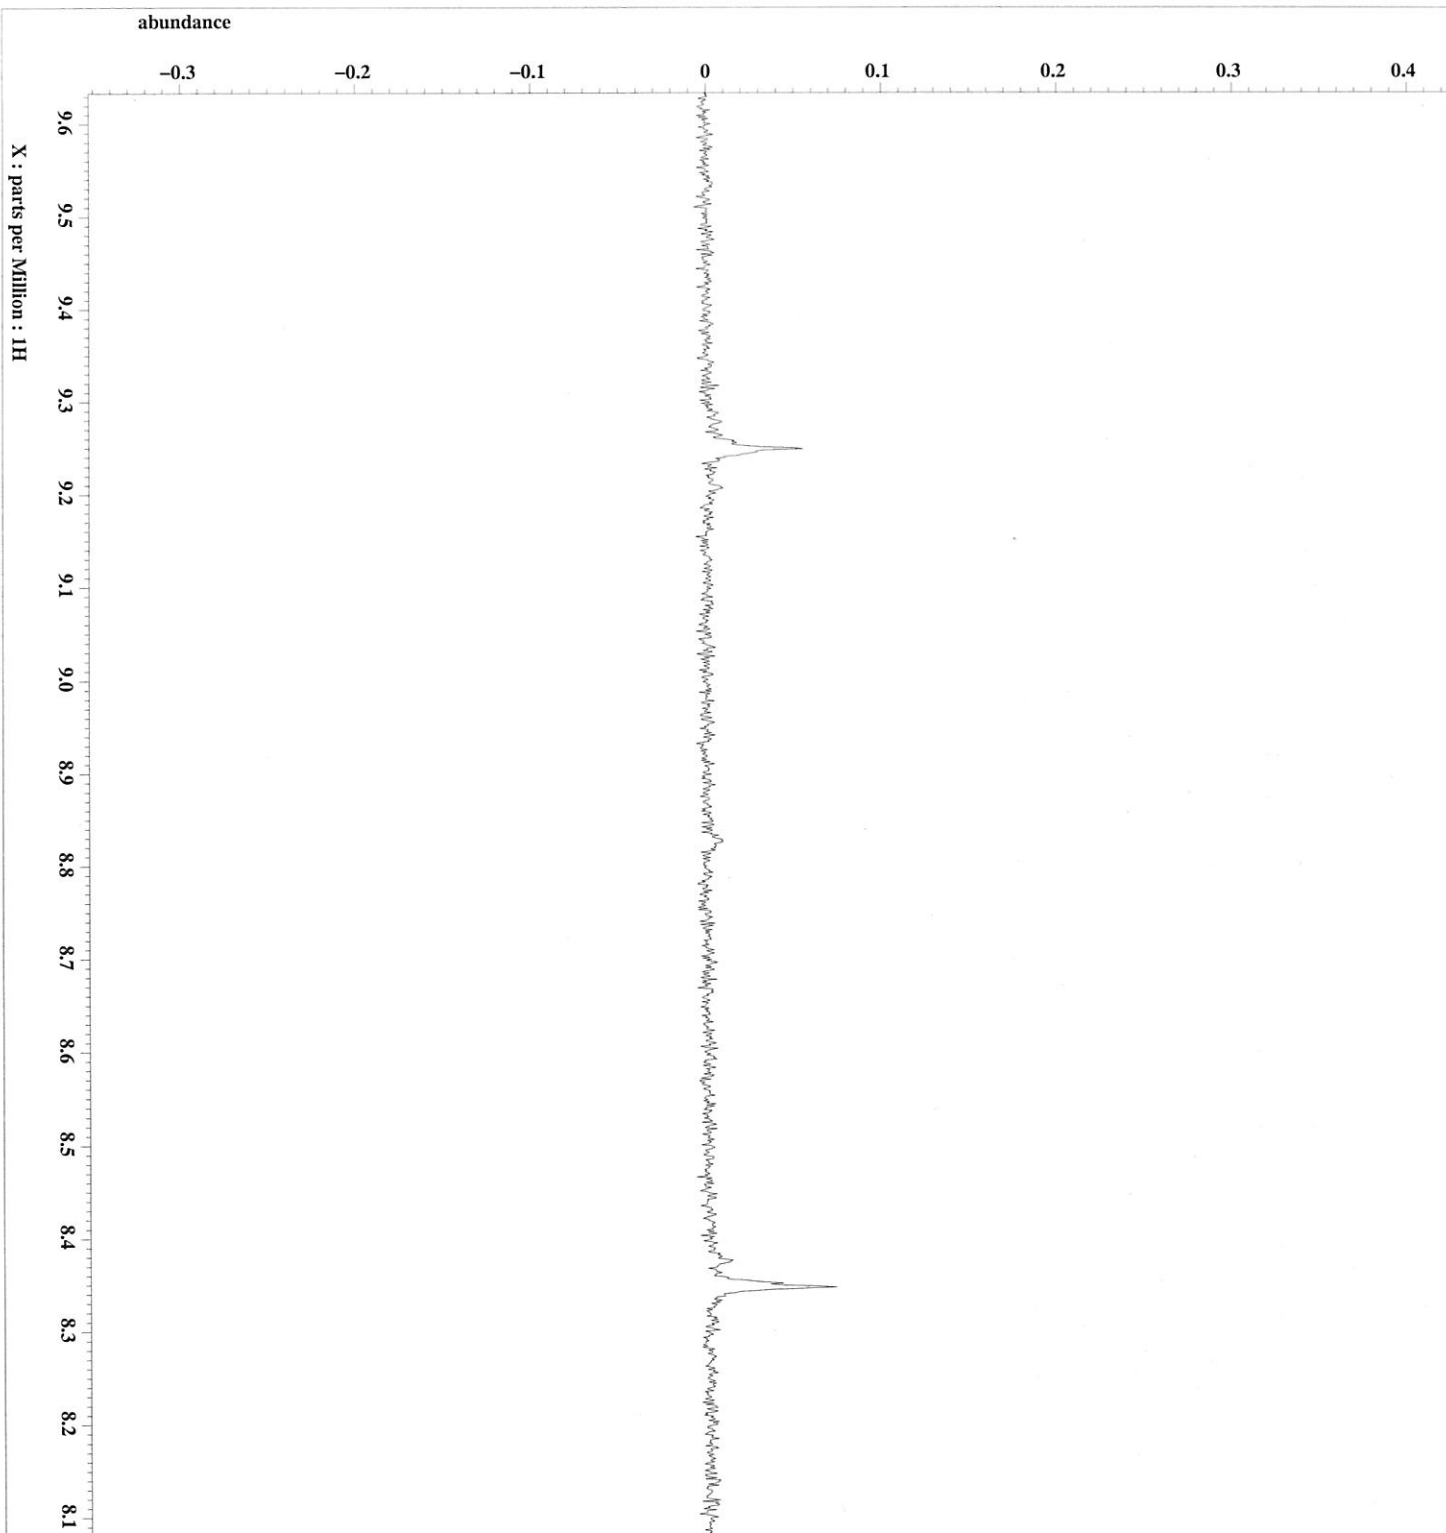

Figure S3. <sup>1</sup>H NMR of **1b** (Low-field region).

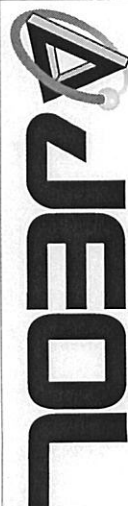

```

---- PROCESSING PARAMETERS ----
dc_balance : 0 : FALSE
semp : 0.2 [Hz] : 0.0 [s]
trapezoid3 : 0 [%] : 80 [%] : 100 [%]
zerofill : 1
fft : 1 : TRUE : TRUE
machinephase
ppm
  
```

```

Filename = 20161005tetra-2.fdf
Author = delta
Experiment = single_pulse.ex2
Sample_id = S#407175
Solvent = CHLOROFORM-D
Creation time = 5-OCT-2016 10:00:18
Revision time = 7-OUL-2017 18:58:52
Current_time = 7-OUL-2017 19:00:29
  
```

```

Comment = single_pulse
Data_format = 1D COMPLEX
Dim_size = 13107
Dim_title = 1H
Dim_units = [ppm]
Dimensions = X
Spectrometer = ECA500
Site = JNM-ECA500
  
```

```

Field_strength = 11.7473579 [T] (500 [MH
X_acq_duration = 1.74587904 [s]
X_domain = 1H
X_freq = 500.15991521 [MHz]
X_offset = 5.0 [ppm]
X_points = 16384
X_preampl = 1
X_resolution = 0.57277737 [Hz]
X_sweep = 9.38438438 [kHz]
Irr_domain = 1H
Irr_freq = 500.15991521 [MHz]
Irr_offset = 5.0 [ppm]
Irr_domain = 1H
Irr_freq = 500.15991521 [MHz]
Irr_offset = 5.0 [ppm]
Mod_return = FALSE
Scans = 1
Total_scans = 8
X_90_width = 6.24 [us]
X_acq_time = 1.74587904 [s]
X_angle = 45 [deg]
X_atn = 3.4 [db]
X_pulse = 3.12 [us]
Irr_mode = Off
Irr_mode = FALSE
Dante_presat = 58
Initial_wait = 1 [s]
Recvr_gain = 5 [s]
Relaxation_delay = 6.74587904 [s]
Repetition_time = 20.2 [dc]
Temp_get
  
```

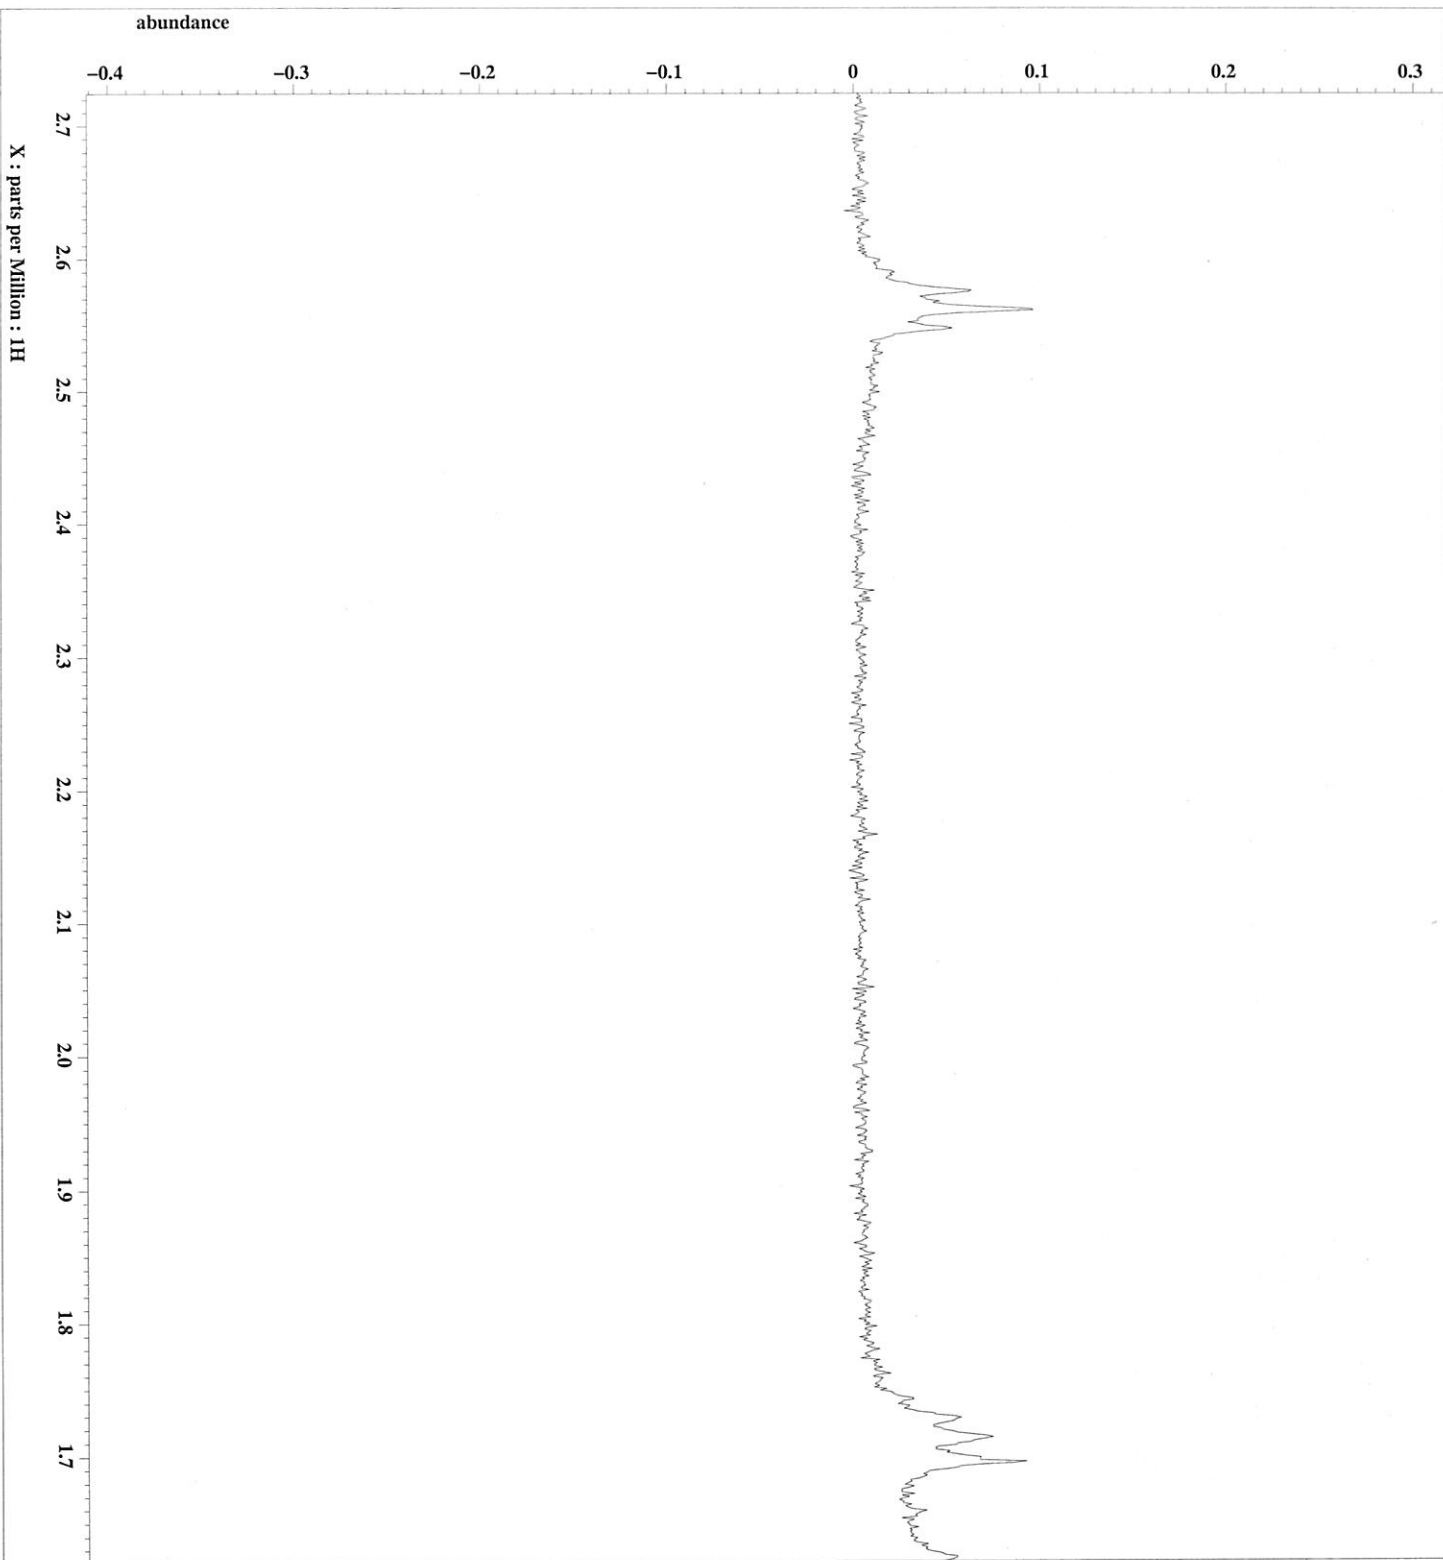

Figure S3. <sup>1</sup>H NMR of **1b** (Up-field region).

```

---- PROCESSING PARAMETERS ----
dc balance : 0 : FALSE
smp : 0.2[Hz] : 0.0[ls]
trapzoid3 : 0[%] : 80[%] : 100[%]
zerofill : 1
fft : 1 : TRUE : TRUE
machinephase
ppm
  
```

```

Filename = 20161005tetra-2.fdf
Author = delta
Experiment = single_pulse.ex2
Sample_id = S#407175
Solvent = CHLOROFORM-D
Creation_time = 5-OCT-2016 10:00:18
Revision_time = 7-JUL-2017 18:58:52
Current_time = 7-JUL-2017 19:00:42
  
```

```

Comment = single_pulse
Data_format = 1D COMPLEX
Dim_size = 13107
Dim_title = 1H
Dim_units = [ppm]
Dimensions = X
Site = ECA500
Spectrometer = JNM-ECA500
  
```

```

Field_strength = 11.7473579 [T] (500 [MH]
X_acq_duration = 1.74587904 [s]
X_domain = 1H
X_freq = 500.15991521 [MHz]
X_offset = 5.0 [ppm]
X_points = 16384
X_prescans = 1
X_resolution = 0.57277737 [Hz]
X_sweep = 9.38438438 [kHz]
Irr_domain = 1H
Irr_freq = 500.15991521 [MHz]
Irr_offset = 5.0 [ppm]
Irr_domain = 1H
Tri_freq = 500.15991521 [MHz]
Tri_offset = 5.0 [ppm]
Clipped = FALSE
Mod_return = 1
Scans = 8
Total_scans = 8
  
```

```

X_90_width = 6.24 [us]
X_acq_time = 1.74587904 [s]
X_angle = 45 [deg]
X_atn = 3.4 [db]
X_pulse = 3.12 [us]
Irr_mode = Off
Tri_mode = FALSE
Dante_presat = 1 [ls]
Recvr_gain = 58
Relaxation_delay = 5 [s]
Repetition_time = 6.74587904 [s]
Temp_get = 20.2 [dC]
  
```

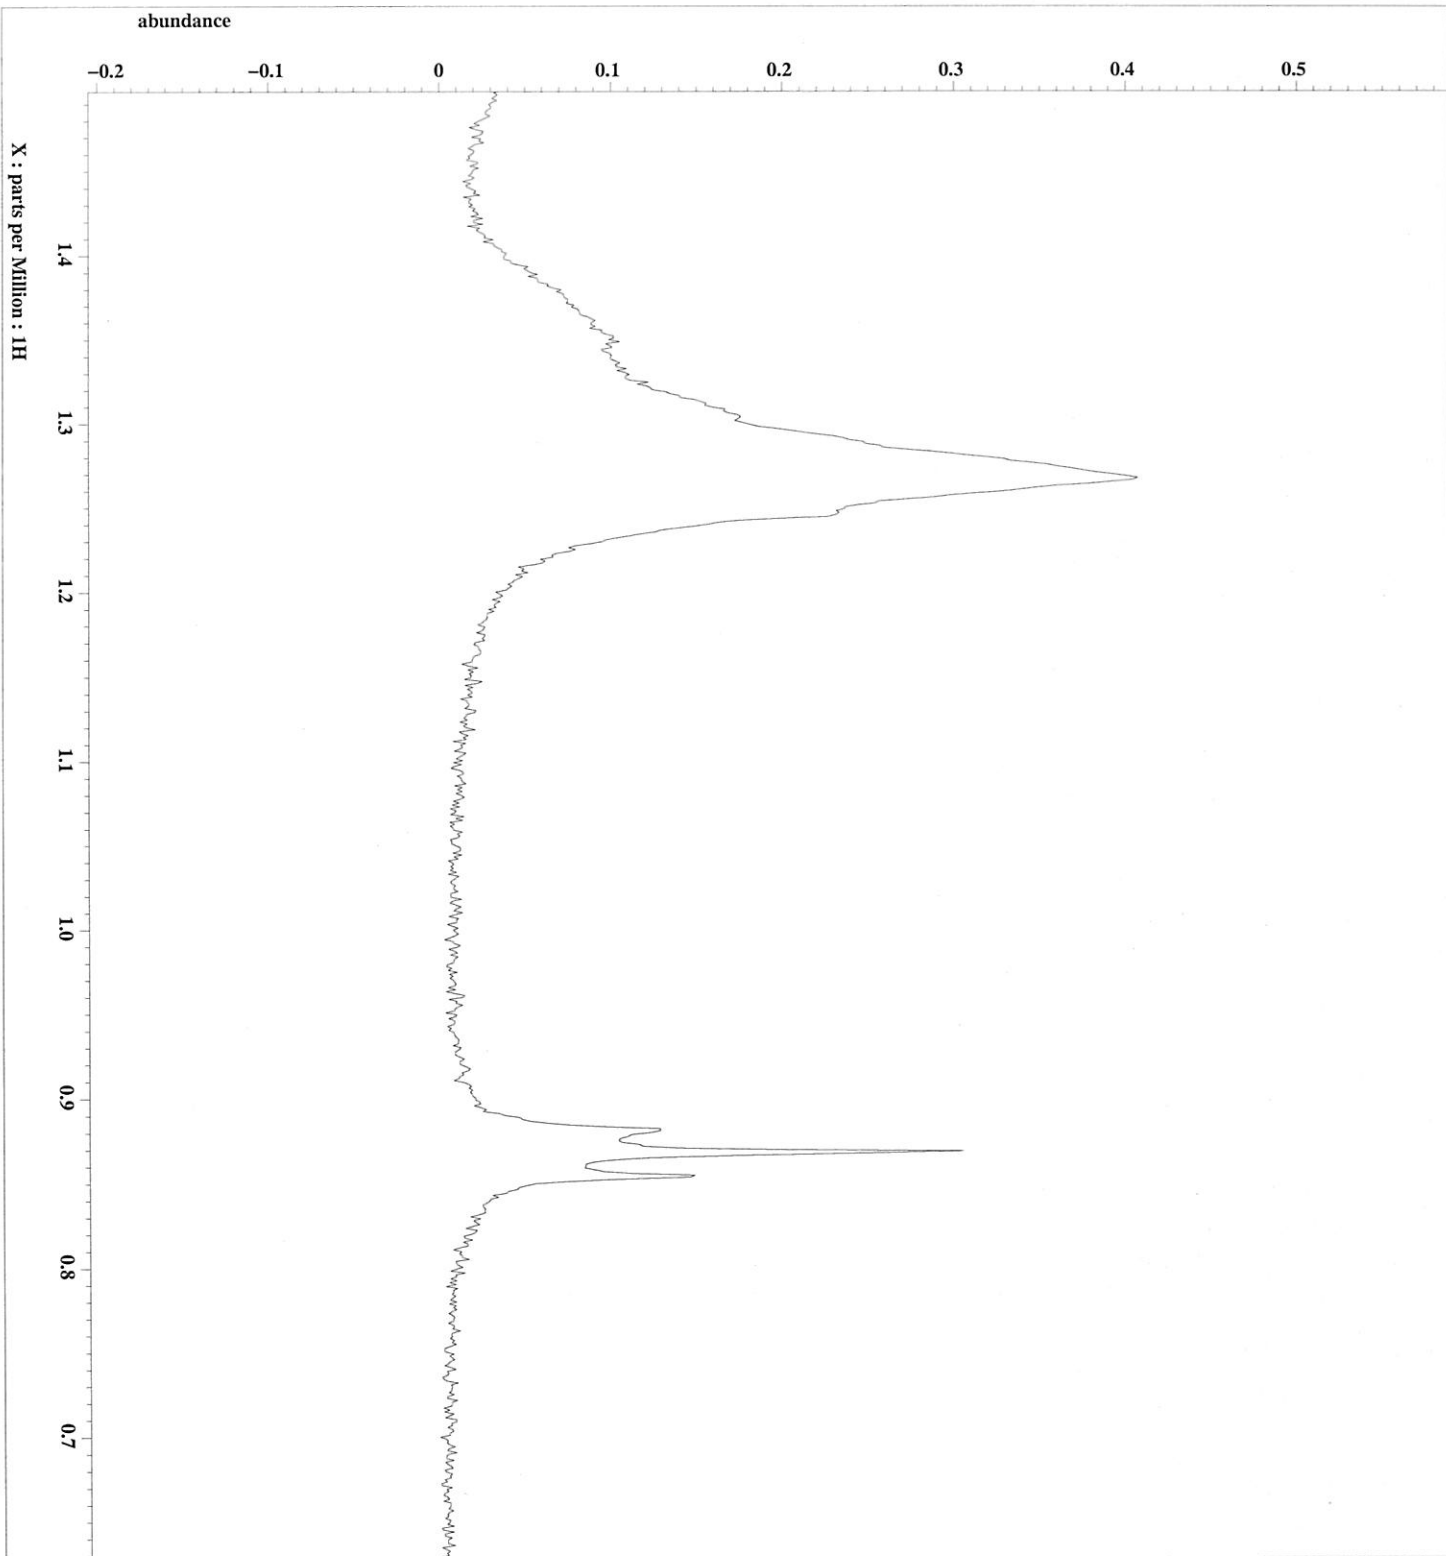

Figure S3. <sup>1</sup>H NMR of **1b** (Up-field region 2).

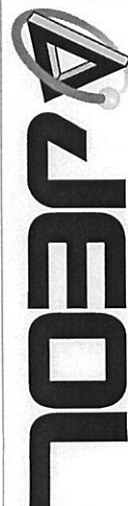

```

---- PROCESSING PARAMETERS ----
dc balance : 0 : FALSE
smp : 2.0 [Hz] : 0.0 [s]
trapzoid3 : 0 [%] : 80 [%]
zerofill : 1
fft : 1 : TRUE : TRUE
machinephase
ppm
  
```

```

Filename = c12h25-c113c-2.jdf
Author =
Experiment = single_pulse_dec
Sample_id = S#747930
Solvent = CHLOROFORM-D
Creation_time = 2-AUG-2016 08:08:26
Revision_time = 7-JUL-2017 19:02:07
Current_time = 7-JUL-2017 19:02:33
  
```

```

Comment = single pulse decouple
Data_format = 1D COMPLEX
Dim_size = 26214
Dim_title = 13C
Dim_units = [ppm]
Dimensions = X
Site = ECA500
Spectrometer = JNM-ECA500
  
```

```

Field_strength = 11.7473579 [T] (500 [MH
X_acq_duration = 0.83361792 [s]
X_domain = 13C
X_freq = 125.76529768 [MHz]
X_offset = 100 [ppm]
X_points = 32768
X_prescans = 4
X_resolution = 1.19959034 [Hz]
X_sweep = 39.3081761 [kHz]
Irr_domain = 1H
Irr_freq = 500.15991521 [MHz]
Irr_offset = 5.0 [ppm]
Clipped = FALSE
Mod_return = 1
Scans = 16000
Total_scans = 16000
  
```

```

X_90_width = 10.87 [us]
X_acq_time = 0.83361792 [s]
X_angle = 30 [deg]
X_atn = 6.5 [db]
X_pulse = 3.62333333 [us]
Irr_atn_dec = 26.772 [db]
Irr_atn_noe = 26.772 [db]
Irr_noise = WALTZ
Decoupling = TRUE
Initial_wait = 1 [s]
Noe_time = TRUE
Noe_gain = 2 [s]
Relaxation_delay = 50
Relaxation_delay = 2 [s]
Repetition_time = 2.83361792 [s]
Temp_set = 21.5 [dC]
  
```

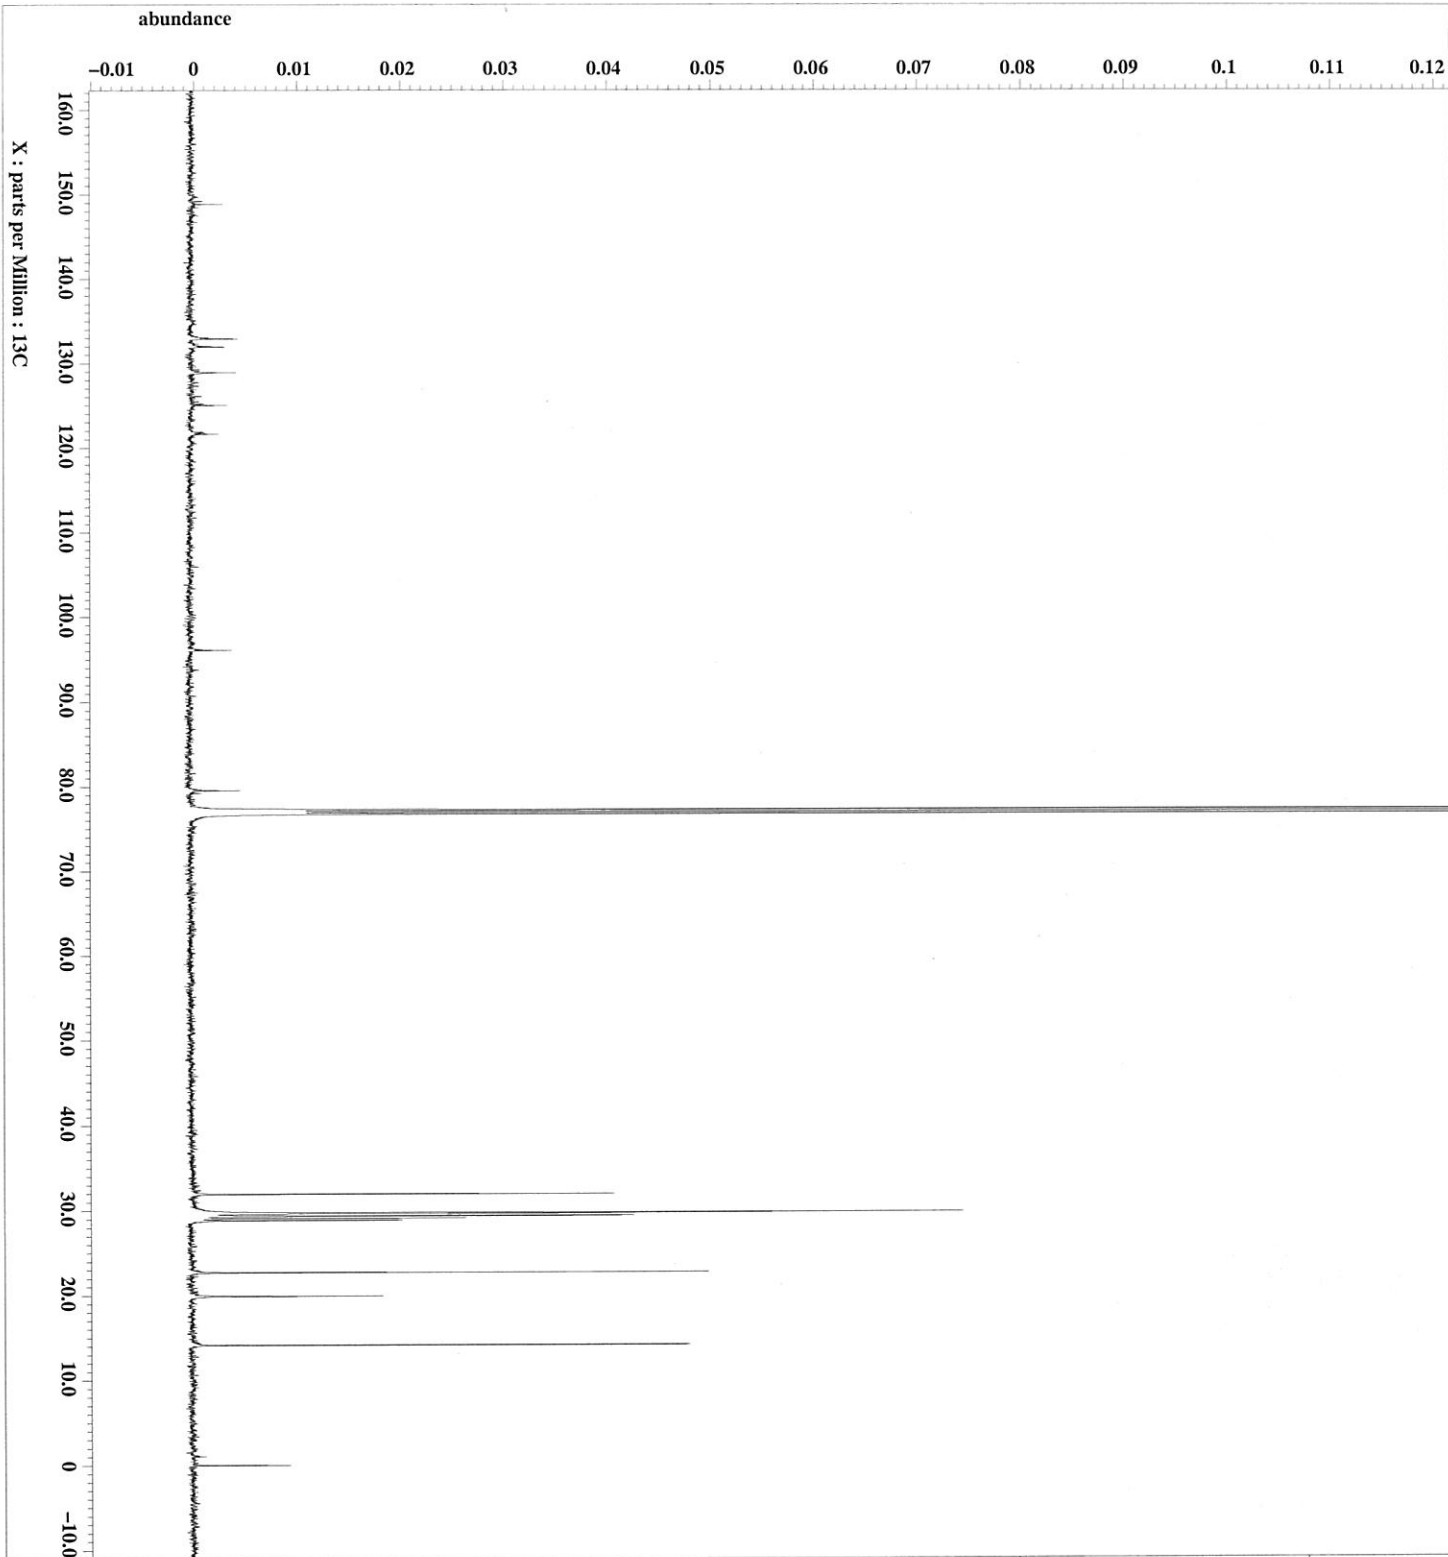

Figure S4. <sup>13</sup>C NMR of 1b.

```

---- PROCESSING PARAMETERS ----
dc_balance : 0 : FALSE
seep : 2.0 [Hz] : 0.0 [s]
trapezoid3 : 0 [%] : 80 [%] : 100 [%]
zerofill : 1
fft : 1 : TRUE : TRUE
machinephase
ppm
  
```

```

Filename = c12h25-c113c-2.jdf
Author = delta
Experiment = single_pulse_dec
Sample_id = S#747930
Solvent = CHLOROFORM-D
Creation_time = 2-AUG-2016 08:08:26
Revision_time = 7-JUL-2017 19:02:07
Current_time = 7-JUL-2017 19:03:11
  
```

```

Comment = single pulse decouple
Data_format = 1D COMPLEX
Dim_size = 26214
Dim_title = 13C
Dim_units = [ppm]
Dimensions = X
Site = ECA500
Spectrometer = JNM-ECA500
  
```

```

Field_strength = 11.7473579 [T] (500 [MH
X_acq_duration = 0.83361792 [s]
X_domain = 13C
X_freq = 125.76529768 [MHz]
X_offset = 100 [ppm]
X_points = 32768
X_prescans = 4
X_resolution = 1.19959034 [Hz]
X_sweep = 39.3081761 [kHz]
Irr_domain = 1H
Irr_freq = 500.15991521 [MHz]
Irr_offset = 5.0 [ppm]
Clipped = FALSE
Mod_return = 1
Scans = 16000
Total_scans = 16000
  
```

```

X_90_width = 10.87 [us]
X_acq_time = 0.83361792 [s]
X_angle = 30 [deg]
X_atn = 6.5 [db]
X_pulse = 3.62333333 [us]
Irr_atn_dec = 26.772 [db]
Irr_atn_noe = 26.772 [db]
WALTZ = TRUE
Decoupling = TRUE
Initial_wait = 1 [s]
Noe = TRUE
Noe_time = 2 [s]
Recvr_gain = 50
Relaxation_delay = 2 [s]
Repetition_time = 2.83361792 [s]
Temp_get = 21.5 [dC]
  
```

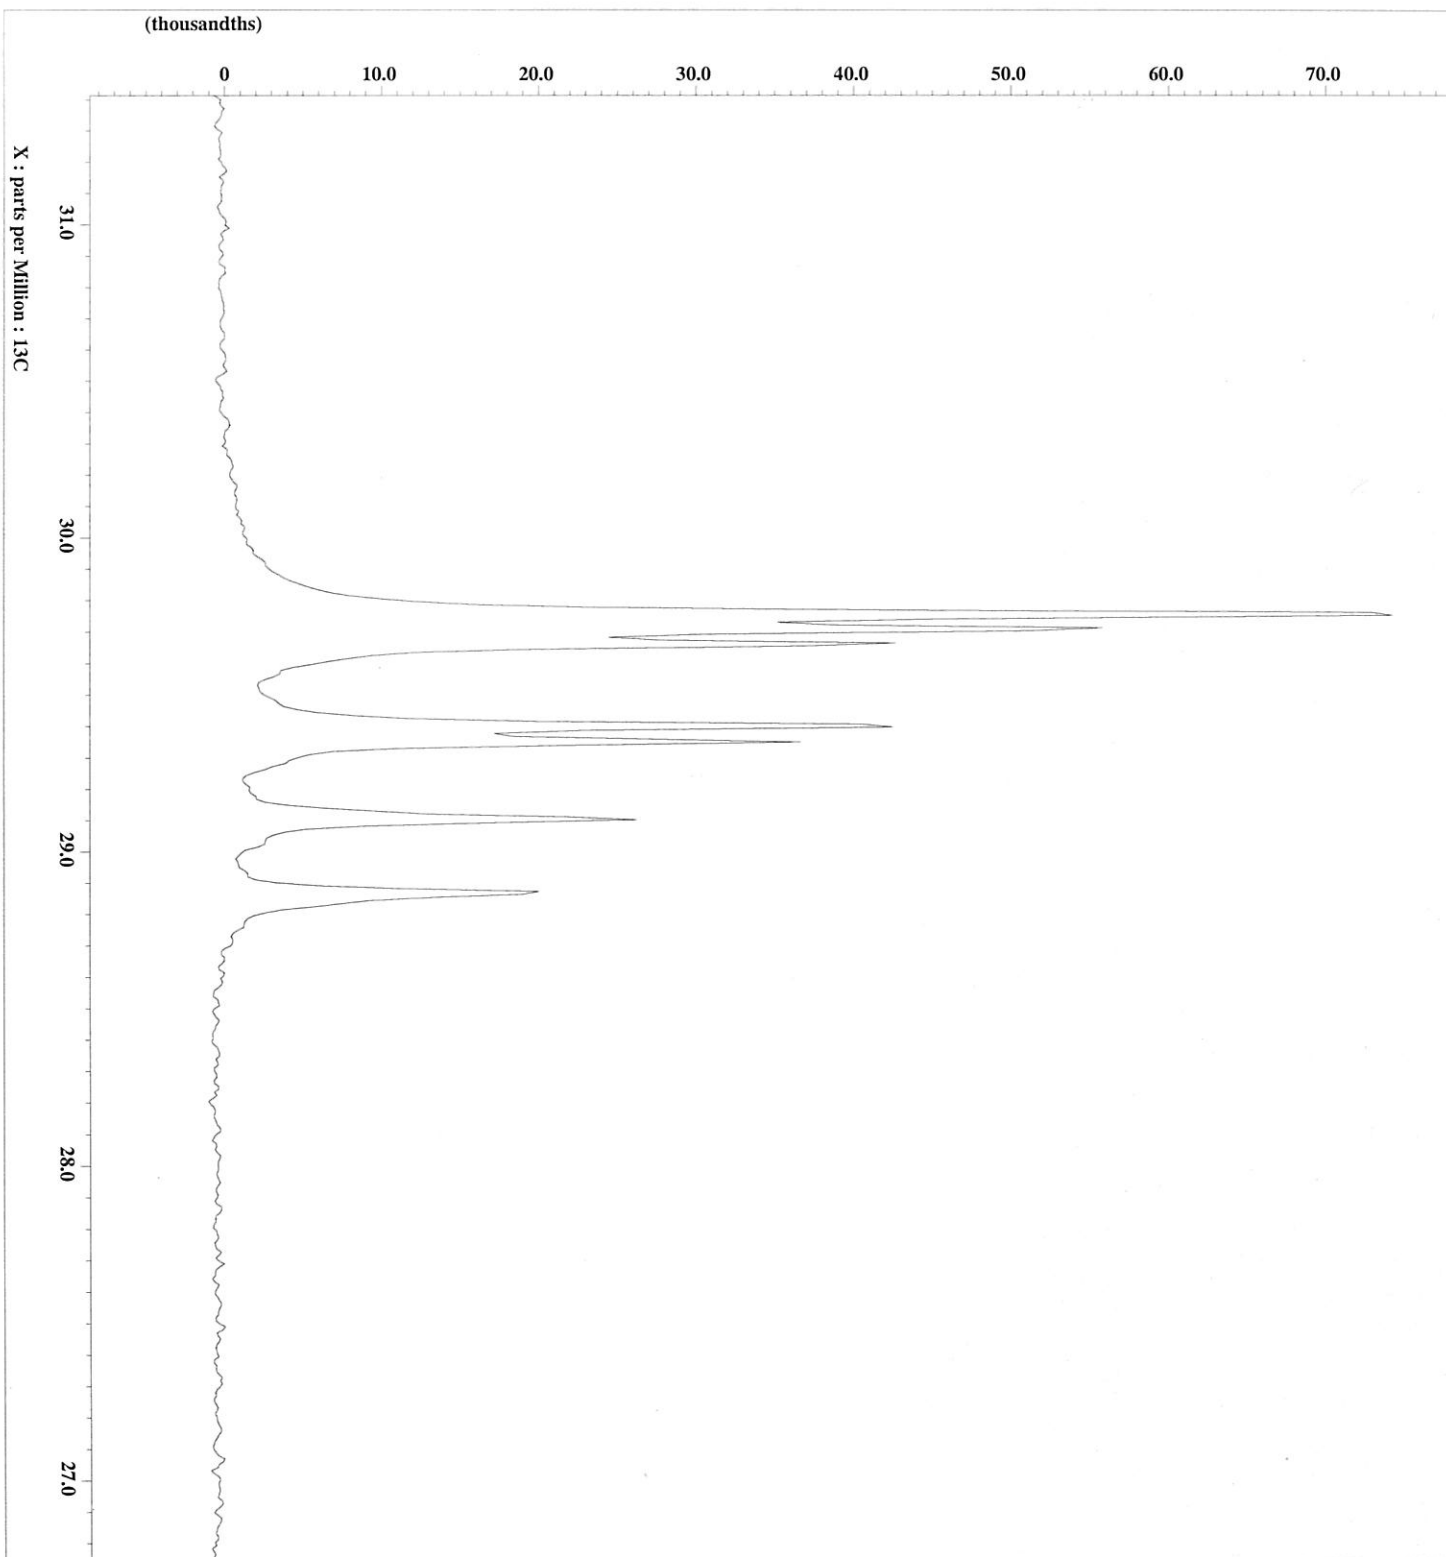

Figure S4. <sup>13</sup>C NMR of **1b** (Up-field region).

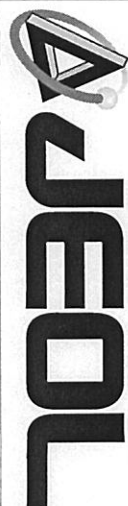

----- PROCESSING PARAMETERS -----  
dc\_balance : 0 : FALSE  
sweep : 0.2 [Hz] : 0.0 [s]  
trapezoid3 : 0 [%] : 80 [%] : 100 [%]  
zerofill : 1  
fft : 1 : TRUE : TRUE  
machinephase  
ppm

Filename = 20161003pna-2.jdf  
Author = delta  
Experiment = single\_pulse.ex2  
Sample\_id = S#804101  
Solvent = CHLOROPFORM-D  
Creation\_time = 3-OCT-2016 21:00:08  
Revision\_time = 7-JUL-2017 19:04:04  
Current\_time = 7-JUL-2017 19:04:19

Comment = single\_pulse  
Data\_format = 1D COMPLEX  
Dim\_size = 13107  
Dim\_title = 1H  
Dim\_units = [ppm]  
Dimensions = X  
Site = ECA500  
Spectrometer = JNM-ECA500

Field\_strength = 11.7473579 [T] (500 [MH  
X\_acq\_duration = 1.74587904 [s]  
X\_domain = 1H  
X\_freq = 500.15991521 [MHz]  
X\_offset = 5.0 [ppm]  
X\_points = 16384  
X\_prescans = 1  
X\_resolution = 0.57277737 [Hz]  
X\_sweep = 9.384384381 [kHz]  
Irr\_domain = 1H  
Irr\_freq = 500.15991521 [MHz]  
Irr\_offset = 5.0 [ppm]  
Irr\_domain = 1H  
Irr\_freq = 500.15991521 [MHz]  
Irr\_offset = 5.0 [ppm]  
Mod\_return = FALSE  
Scans = 1  
Total\_scans = 8

X\_90\_width = 6.24 [us]  
X\_acq\_time = 1.74587904 [s]  
X\_angle = 45 [deg]  
X\_atn = 3.4 [dB]  
X\_pulse = 3.12 [us]  
Irr\_mode = Off  
Irr\_offset = Off  
Dante\_preset = FALSE  
Initial\_wait = 1 [s]  
Recvr\_gain = 50  
Relaxation\_delay = 5 [s]  
Repetition\_time = 6.74587904 [s]  
Temp\_get = 21 [C]

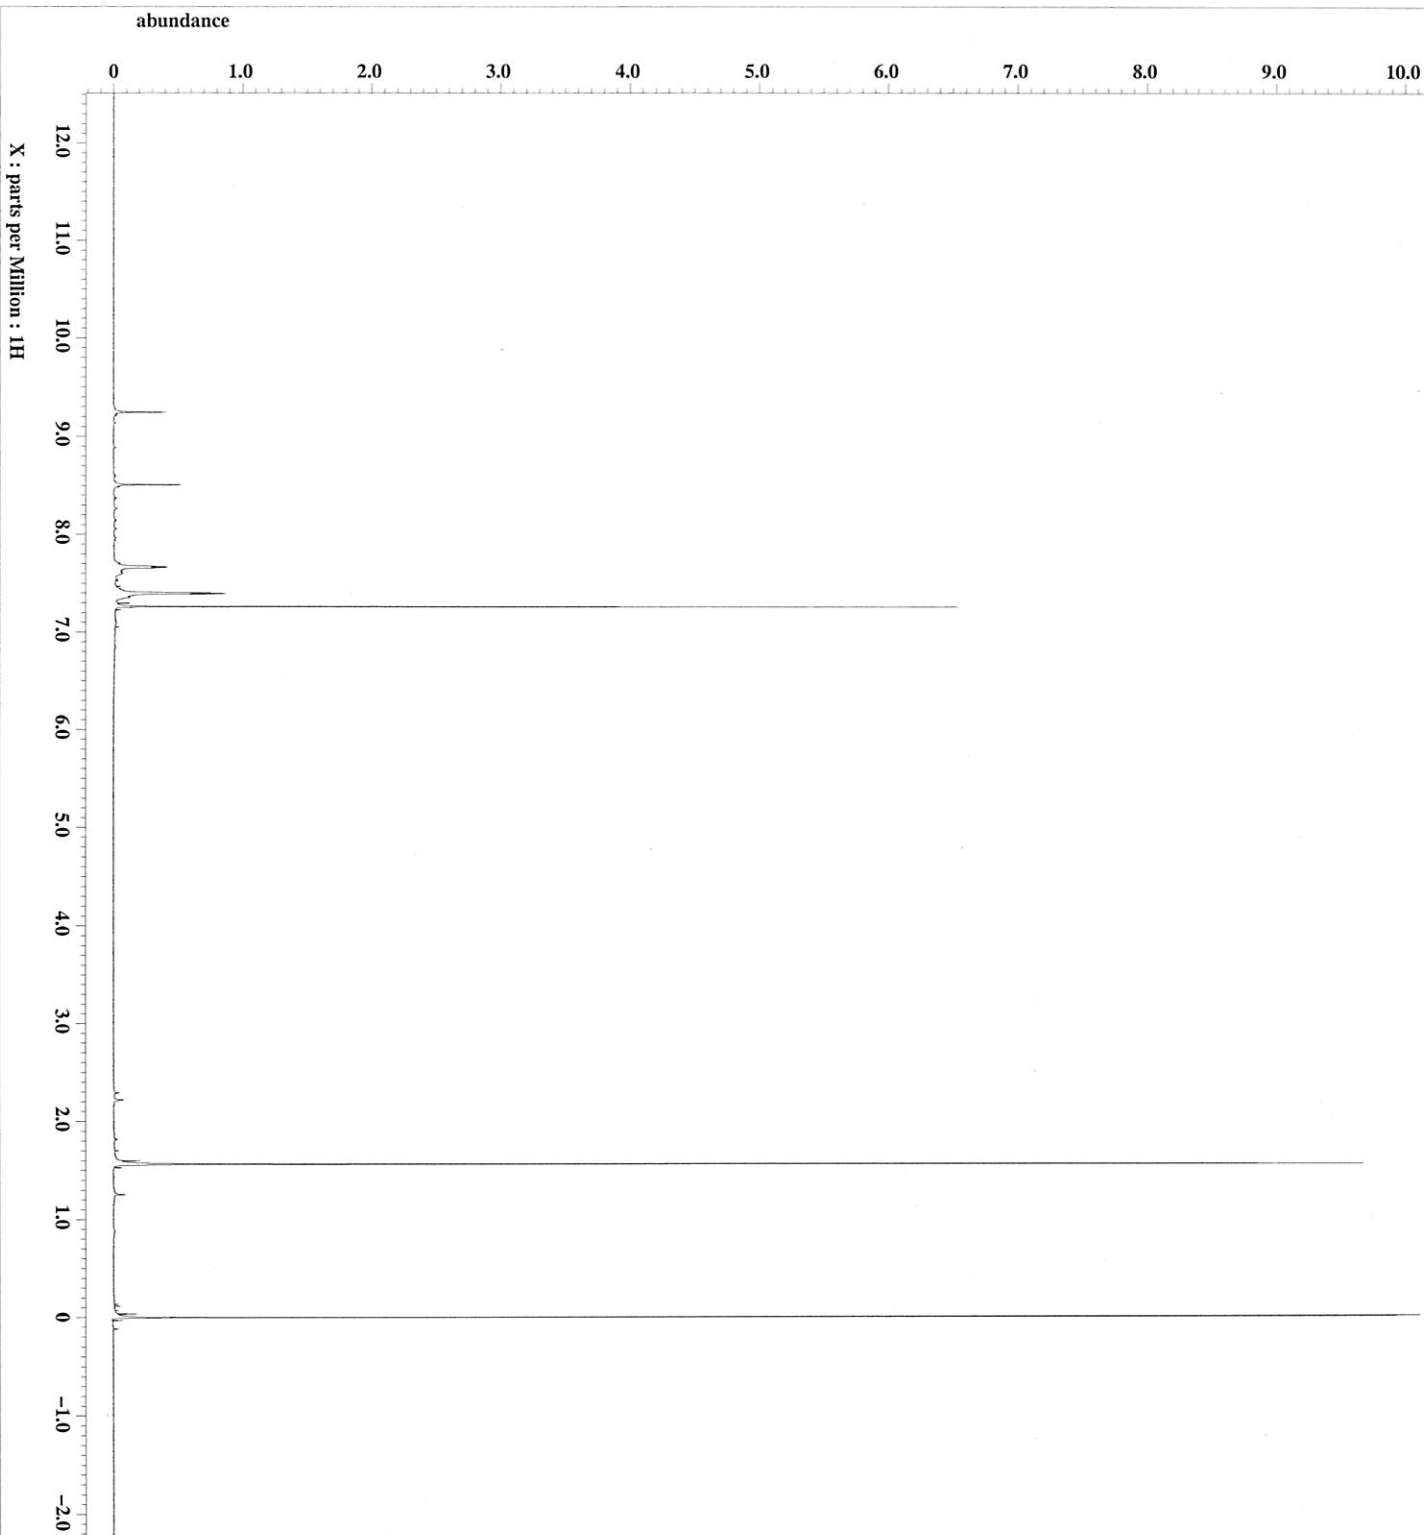

Figure S5. <sup>1</sup>H NMR of 1c.

```

---- PROCESSING PARAMETERS ----
dc_balance : 0 : FALSE
sexp : 0.2 [Hz] : 0.0 [s]
trapzoid3 : 0 [%] : 80 [%] : 100 [%]
zerofill : 1
fft : 1 : TRUE : TRUE
machinphase
ppm
  
```

```

Filename = 20170110c3h9ph-cl-2.f
Author = delta
Experiment = single_pulse.ex2
Sample_id = S#592194
Solvent = CHLOROFORM-D
Creation_time = 10-JAN-2017 14:57:58
Revision_time = 7-JUL-2017 20:00:35
Current_time = 7-JUL-2017 20:00:48
  
```

```

Comment = single_pulse
Data_format = 1D COMPLEX
Dim_size = 13107
Dim_title = 1H
Dim_units = [ppm]
Dimensions = X
Spectrometer = ECA500
Site = JNM-ECA500
  
```

```

Field_strength = 11.7473579 [T] (500 [MH
X_acq_duration = 1.74587904 [s]
X_domain = 1H
X_freq = 500.15991521 [MHz]
X_offset = 5.0 [ppm]
X_points = 16384
X_prescans = 1
X_resolution = 0.57277737 [Hz]
X_sweep = 9.38438438 [kHz]
Irr_domain = 1H
Irr_freq = 500.15991521 [MHz]
Irr_offset = 5.0 [ppm]
Tri_domain = 1H
Tri_freq = 500.15991521 [MHz]
Tri_offset = 5.0 [ppm]
Clipped = FALSE
Mod_return = 1
Scans = 8
Total_scans = 8
  
```

```

X_90_width = 6.24 [us]
X_acq_time = 1.74587904 [s]
X_angle = 45 [deg]
X_atn = 3.4 [dB]
X_pulse = 3.12 [us]
Irr_mode = Off
Tri_mode = Off
Dante_preset = FALSE
Initial_wait = 1 [s]
Recvr_gain = 56
Relaxation_delay = 5 [s]
Repetition_time = 6.74587904 [s]
Temp_get = 20.4 [dC]
  
```

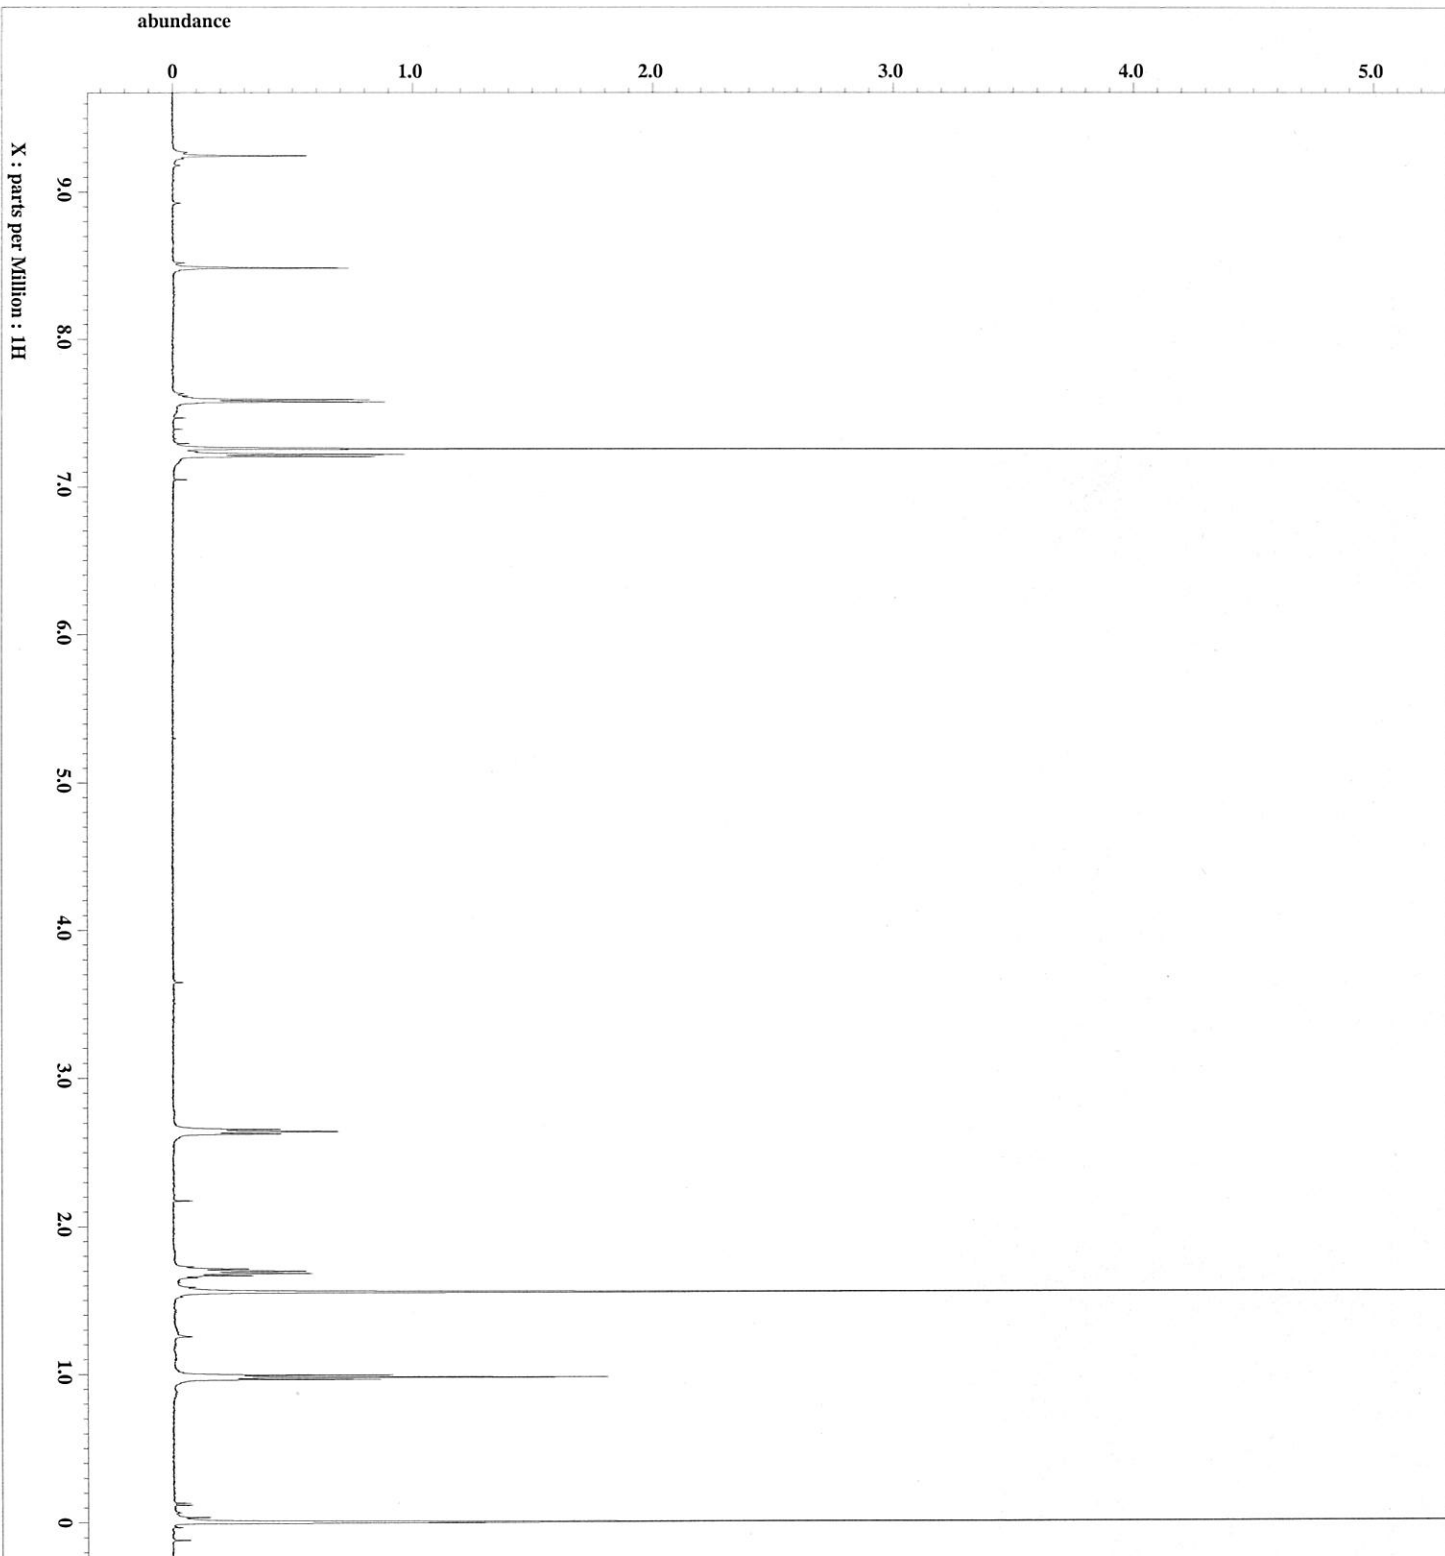

Figure S6. <sup>1</sup>H NMR of **1d**.

```

---- PROCESSING PARAMETERS ----
dc_balance : 0 : FALSE
semp : 0.2[Hz] : 0.0[ls]
trapezoid3 : 0[%] : 80[%] : 100[%]
zerofill : 1
fft : 1 : TRUE : TRUE
machinephase
ppm
  
```

```

Filename = 20170524c6h13ph-cl-2.
Author = delta
Experiment = single_pulse.ex2
Sample_id = S#734695
Solvent = CHLOROFORM-D
Creation_time = 24-MAY-2017 18:42:52
Revision_time = 7-JUL-2017 19:24:41
Current_time = 7-JUL-2017 19:26:09
  
```

```

Comment = single_pulse
Data_format = 1D COMPLEX
Dim_size = 13107
Dim_title = 1H
Dim_units = [ppm]
Dimensions = X
Sitr = ECA500
Sitr2 = JNM-ECA500
  
```

```

Field_strength = 11.7473579 [T] (500 [MH
X_acq_duration = 1.74587904 [s]
X_domain = 1H
X_freq = 500.15991521 [MHz]
X_offset = 5.0 [ppm]
X_points = 16384
X_prescans = 1
X_resolution = 0.57277737 [Hz]
X_sweep = 9.3843838 [kHz]
Irr_domain = 1H
Irr_freq = 500.15991521 [MHz]
Irr_offset = 5.0 [ppm]
Tri_domain = 1H
Tri_freq = 500.15991521 [MHz]
Tri_offset = 5.0 [ppm]
Clipped = FALSE
Mod_return = 1
Scans = 8
Total_scans = 8
  
```

```

X_90_width = 6.24 [us]
X_acq_time = 1.74587904 [s]
X_angle = 45 [deg]
X_atn = 3.4 [db]
X_pulse = 3.12 [us]
Irr_mode = Off
Tri_mode = Off
Dance_preset = FALSE
Initial_wait = 1 [s]
Recvr_gain = 56
Relaxation_delay = 5 [s]
Repetition_time = 6.74587904 [s]
Temp_get = 21 [dC]
  
```

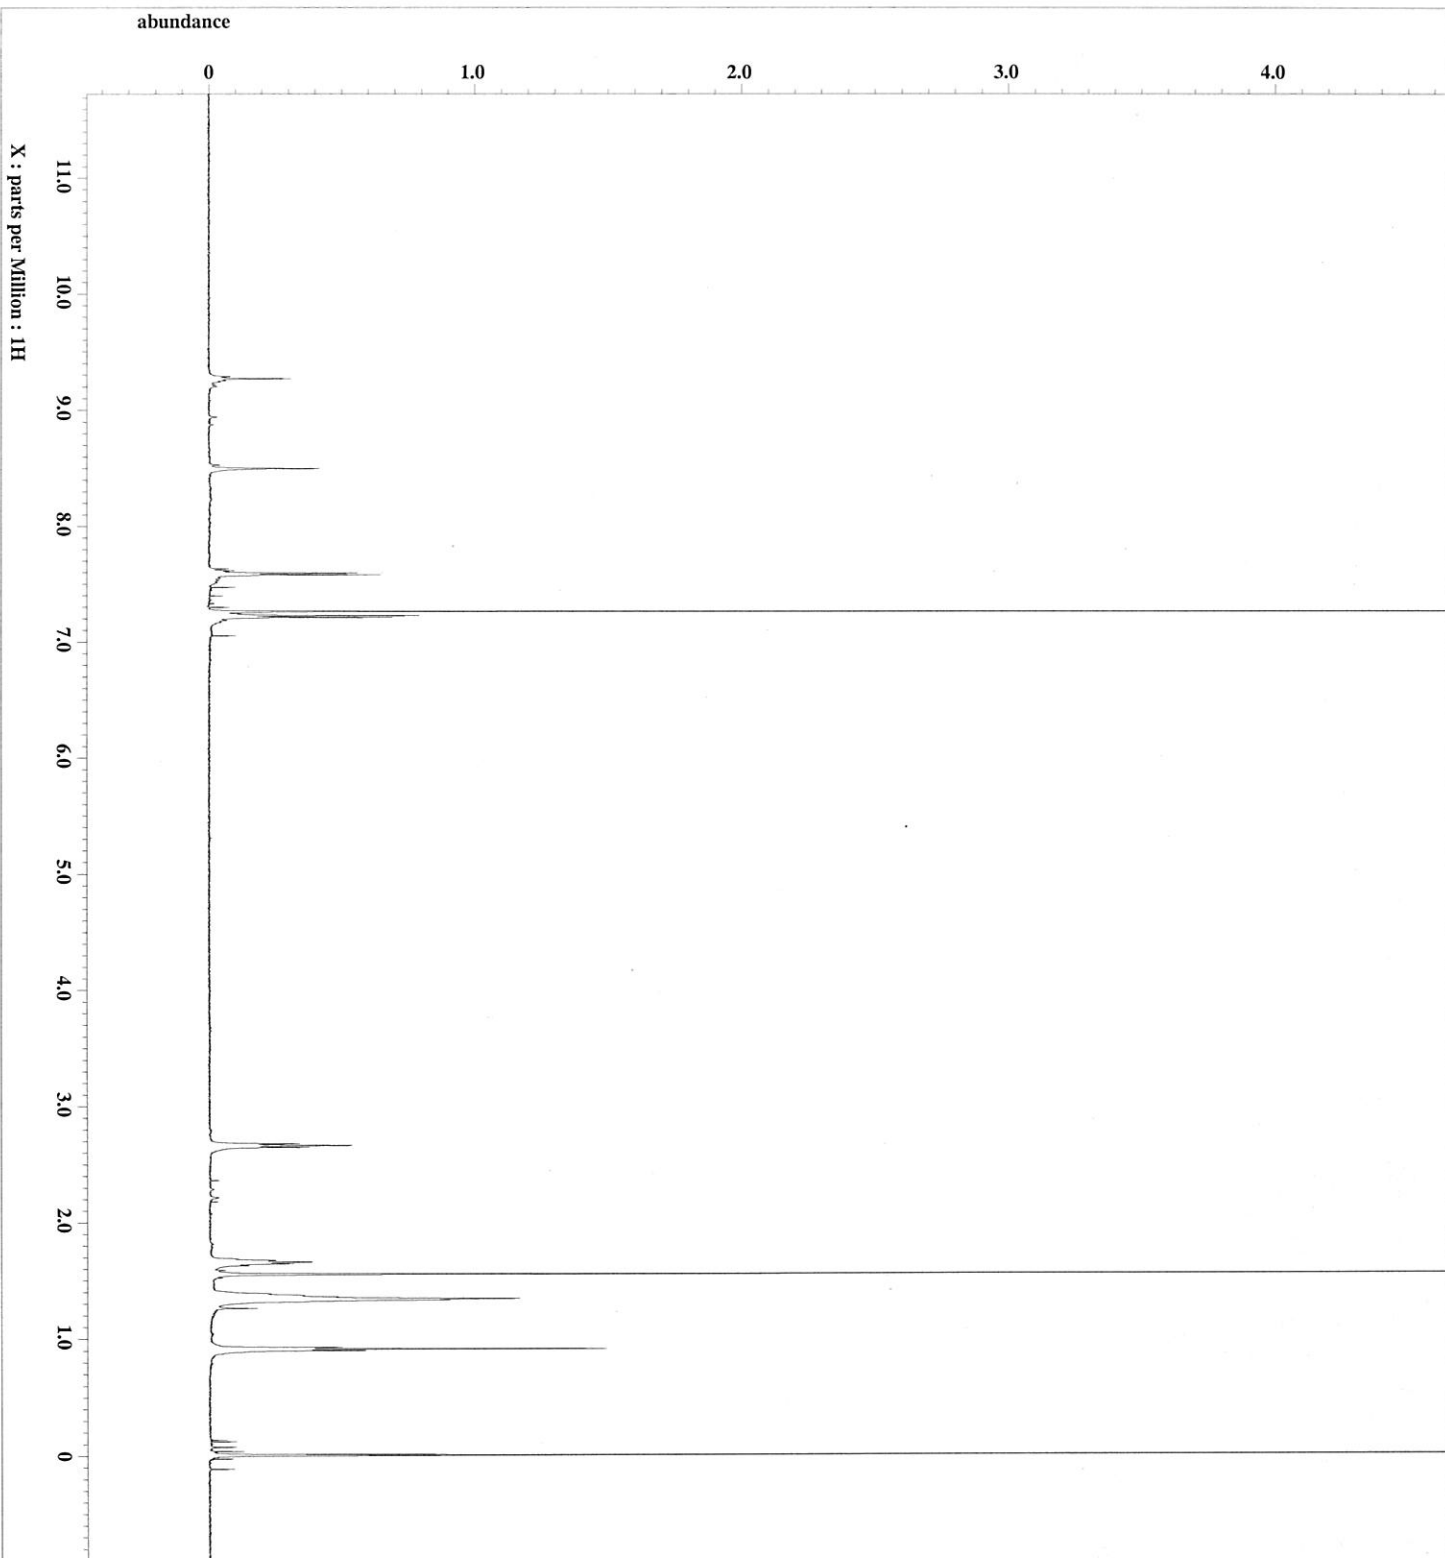

Figure S7. <sup>1</sup>H NMR of **1e**.



```

---- PROCESSING PARAMETERS ----
dc balance : 0 : FALSE
semp : 0.2[Hz] : 0.0[ls]
trapzoid3 : 0[%] : 80[%] : 100[%]
zerofill : 1
fft : 1 : TRUE : TRUE
machinephase
ppm
  
```

```

Filename = 20170524c6h13ph-cl-2.
Author = delta
Experiment = single_pulse.ex2
Sample_id = S#734655
Solvent = CHLOROFORM-D
Creation_time = 24-MAY-2017 18:42:52
Revision_time = 7-JUL-2017 19:24:41
Current_time = 7-JUL-2017 19:26:58
  
```

```

Comment = single_pulse
Data_format = 1D COMPLEX
Dim_size = 13107
Dim_title = 1H
Dim_units = [ppm]
Dimensions = X
Spectrometer = ECA500
Site = JNM-ECA500
  
```

```

Field_strength = 11.747379[T] (500[MH
X_acq_duration = 1.74587904[ls]
X_domain = 1H
X_freq = 500.15991521[MHz]
X_offset = 5.0[ppm]
X_points = 16384
X_prescans = 1
X_resolution = 0.57227737[Hz]
X_sweep = 9.38438438[kHz]
Irr_domain = 1H
Irr_freq = 500.15991521[MHz]
Irr_offset = 5.0[ppm]
Tri_domain = 1H
Tri_freq = 500.15991521[MHz]
Tri_offset = 5.0[ppm]
Clipped = FALSE
Mod_return = 1
Scans = 8
Total_scans = 8
  
```

```

X_90_width = 6.24[us]
X_acq_time = 1.74587904[ls]
X_angle = 45[deg]
X_atn = 3.4[db]
X_pulse = 3.12[us]
Irr_mode = Off
Tri_mode = Off
Dance_preset = FALSE
Initial_wait = 1[ls]
Recvr_gain = 56
Relaxation_delay = 5[ls]
Repetition_time = 6.74587904[ls]
Temp_get = 21[dc]
  
```

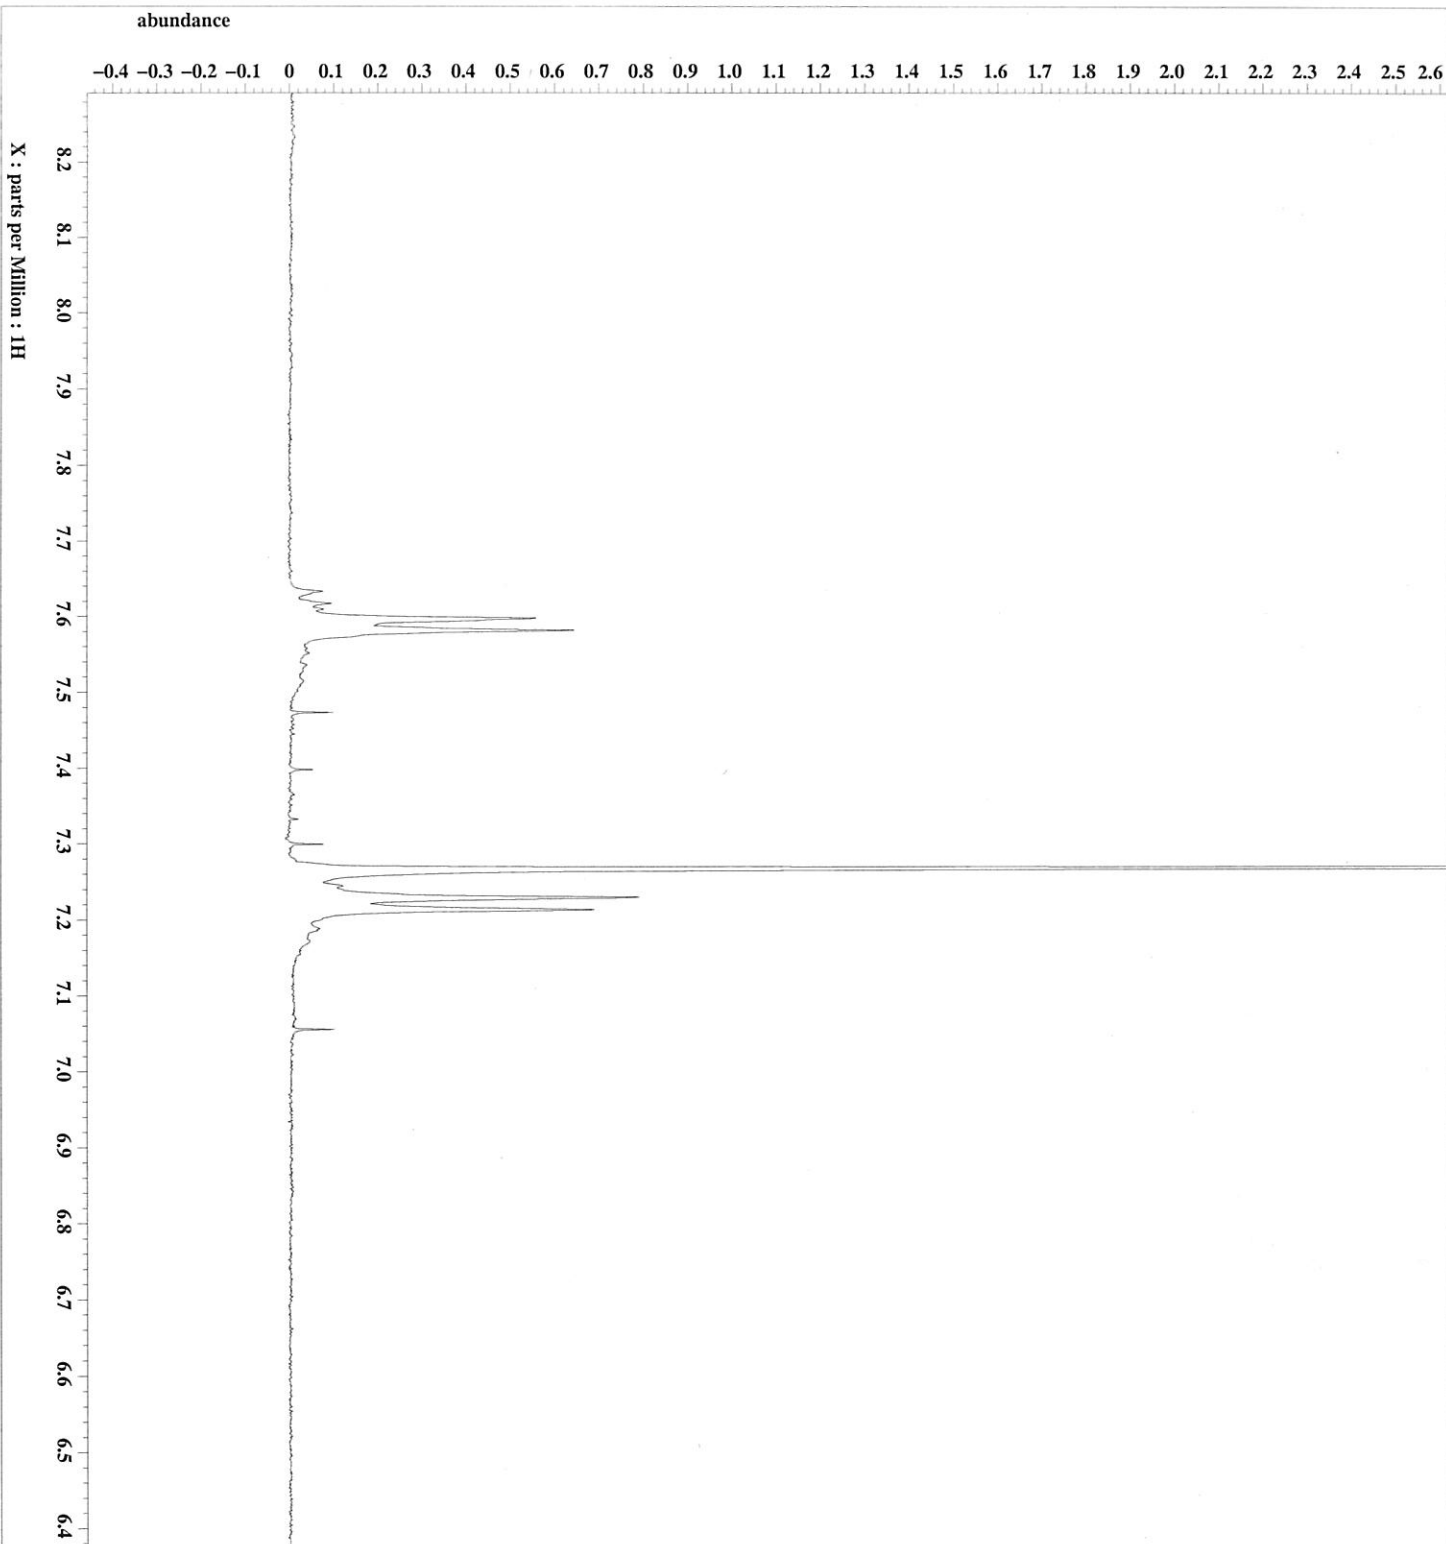

Figure S7. <sup>1</sup>H NMR of **1e** (Low-field region).

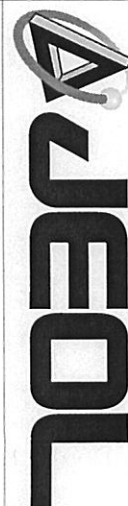

----- PROCESSING PARAMETERS -----  
dc\_balance : 0 : FALSE  
sweep : 0.2 [Hz] : 0.0 [s]  
trapzoid3 : 0 [%] : 80 [%]  
zerofill : 1  
fft : 1 : TRUE : TRUE  
machinephase  
ppm

Filename = 20170524c6h13ph-cl-2.  
Author = delta  
Experiment = single\_pulse.ex2  
Sample\_id = S#734655  
Solvent = CHLOROFORM-D  
Creation\_time = 24-MAY-2017 18:42:52  
Revision\_time = 7-JUL-2017 19:24:41  
Current\_time = 7-JUL-2017 19:27:10

Comment = single\_pulse  
Data\_format = ID COMPLEX  
Dim\_size = 13107  
Dim\_title = 1H  
Dim\_units = [ppm]  
Dimensions = X  
Site = ECA500  
Spectrometer = JNM-ECA500

Field\_strength = 11.7473579 [T] (500 [MH  
X\_acq\_duration = 1.74587904 [s]  
X\_domain = 1H  
X\_freq = 500.15991521 [MHz]  
X\_offset = 5.0 [ppm]  
X\_points = 16384  
X\_prescans = 1  
X\_resolution = 0.57277737 [Hz]  
X\_sweep = 9.38438438 [kHz]  
Irr\_domain = 1H  
Irr\_freq = 500.15991521 [MHz]  
Irr\_offset = 5.0 [ppm]  
Tri\_domain = 1H  
Tri\_freq = 500.15991521 [MHz]  
Tri\_offset = 5.0 [ppm]  
Clipped = FALSE  
Mod\_return = 1  
Scans = 8  
Total\_scans = 8

X\_90\_width = 6.24 [us]  
X\_acq\_time = 1.74587904 [s]  
X\_angle = 45 [deg]  
X\_atn = 3.4 [dB]  
X\_pulse = 3.12 [us]  
Tri\_mode = Off  
Tri\_offset = Off  
Dante\_presat = FALSE  
Initial\_wait = 1 [s]  
Recvr\_gain = 56  
Relaxation\_delay = 5 [s]  
Repetition\_time = 6.74587904 [s]  
Temp\_get = 21 [C]

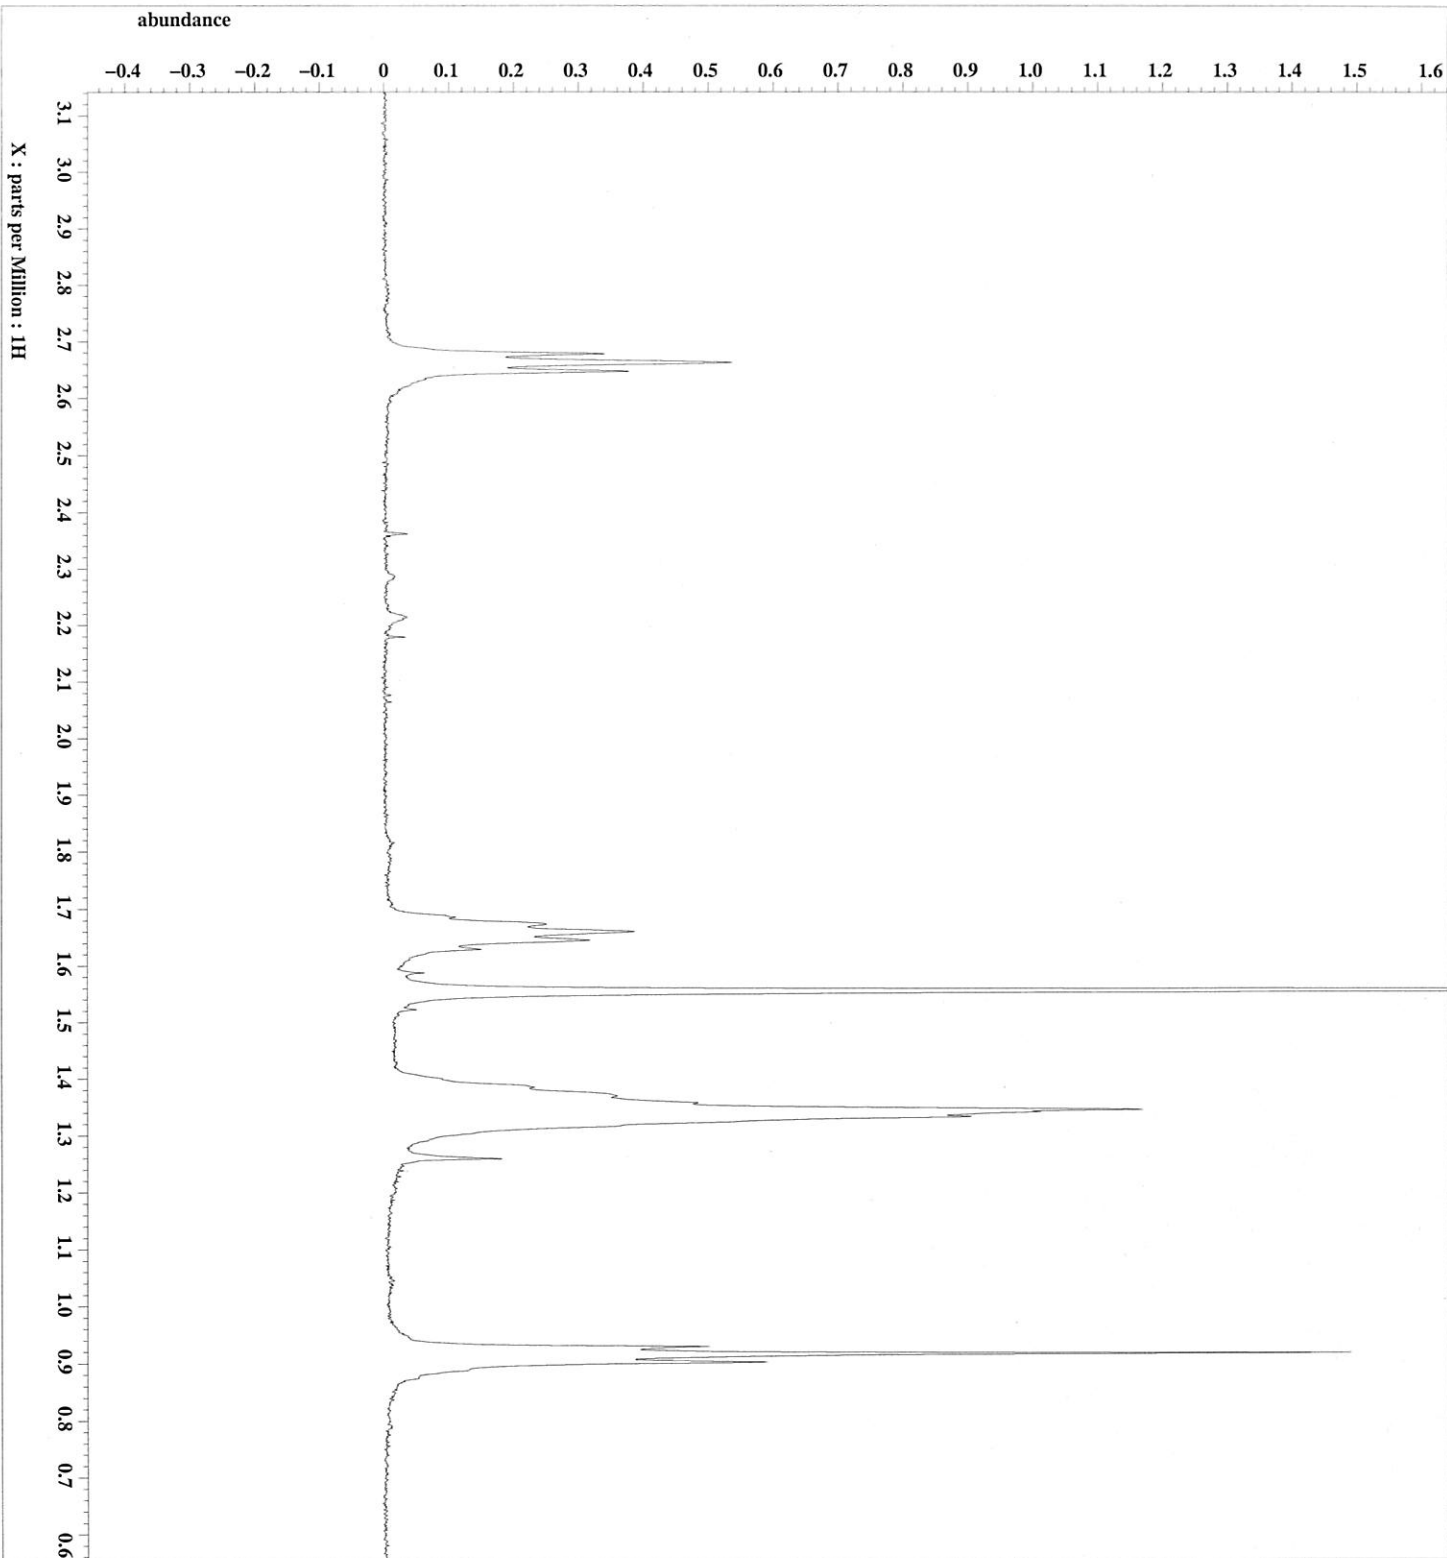

Figure S7. <sup>1</sup>H NMR of **1e** (Up-field region).

```

----- PROCESSING PARAMETERS -----
dc_balance : 0 : FALSE
semp : 0.2 [Hz] : 0.0 [s]
trapzoid3 : 0 [%] : 80 [%] : 100 [%]
zerofill : 1
ite : 1 : TRUE : TRUE
machinephase
ppm
  
```

```

Filename = 20161207CGH130Ph-Cl1-
Author =
Experiment = single_pulse.ex2
Sample_id = S#610866
Solvent = CHLOROFORM-D
Creation time = 7-DEC-2016 15:33:02
Revision time = 7-JUL-2017 19:28:42
Current_time = 7-JUL-2017 19:33:00
  
```

```

Comment = single_pulse
Data_format = 1D COMPLEX
Dim_size = 13107
Dim_title = 1H
Dim_units = [ppm]
Dimensions = X
Site = ECA500
Spectrometer = JNM-ECA500
  
```

```

Field_strength = 11.7473579 [T] (500 [MH
X_acq_duration = 1.74587904 [s]
X_domain = 1H
X_freq = 500.15991521 [MHz]
X_offset = 5.0 [ppm]
X_points = 16384
X_preampl = 1
X_resolution = 0.57277737 [Hz]
X_sweep = 9.38438438 [kHz]
Irr_domain = 1H
Irr_freq = 500.15991521 [MHz]
Irr_offset = 5.0 [ppm]
Irr_domain = 1H
Irr_freq = 500.15991521 [MHz]
Irr_offset = 5.0 [ppm]
Clipped = FALSE
Mod_return = 1
Scans = 8
Total_scans = 8
  
```

```

X_90_width = 6.24 [us]
X_acq_time = 1.74587904 [s]
X_angle = 45 [deg]
X_atn = 3.4 [dB]
X_pulse = 3.13 [us]
Irr_mode = Off
Irr_mode = FALSE
Dante_presat = 1 [s]
Recvr_gain = 58
Relaxation_delay = 5 [s]
Repetition_time = 6.74587904 [s]
Temp_get = 20.1 [dC]
  
```

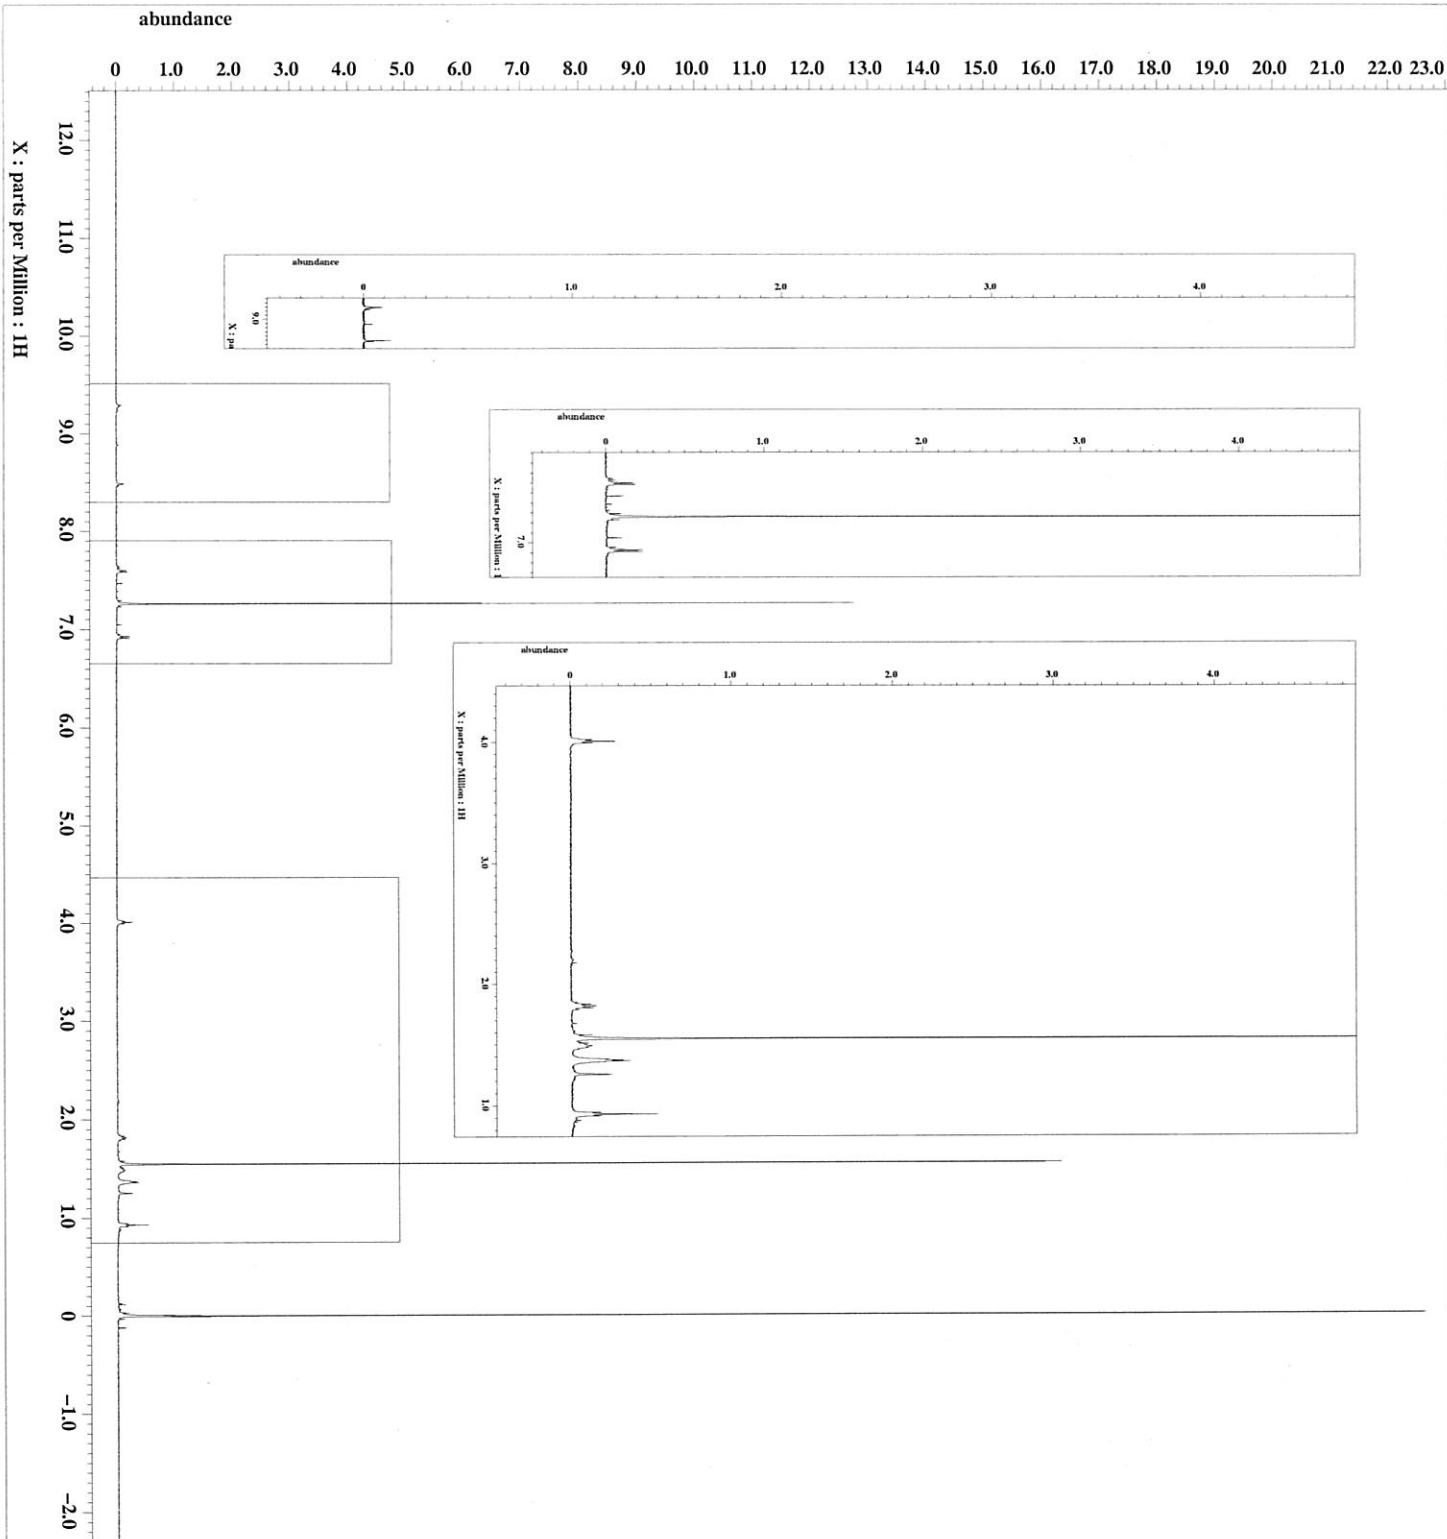

Figure S8. <sup>1</sup>H NMR of **1f**.

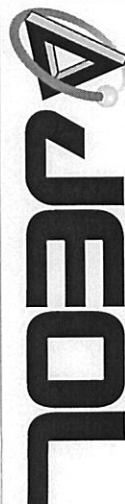

----- PROCESSING PARAMETERS -----  
dc\_balance : 0 : FALSE  
smp : 0.2 [Hz] : 0.0 [s]  
trepzoid3 : 0 [%] : 80 [%] : 100 [%]  
zerofill : 1  
ife : 1 : TRUE : TRUE  
machinepnase  
ppm

Filename = 20161215c4h9-f-2.jdf  
Author = delta  
Experiment = single\_pulse.ex2  
Sample\_id = S#447770  
Solvent = CHLOROFORM-D  
Creation time = 15-DEC-2016 10:59:35  
Revision time = 7-JUL-2017 19:34:27  
Current\_time = 7-JUL-2017 19:35:31

Comment = single\_pulse  
Data\_format = 1D COMPLEX  
Dim\_size = 13107  
Dim\_title = 1H  
Dim\_units = [ppm]  
Dimensions = X  
Site = ECA500  
Spectrometer = JNM-ECA500

Field\_strength = 11.7473579 [T] (500 [MH  
X\_acq\_duration = 1.74587904 [s]  
X\_domain = 1H  
X\_freq = 500.15991521 [MHz]  
X\_offset = 5.0 [ppm]  
X\_points = 16384  
X\_prescans = 1  
X\_resolution = 0.57277737 [Hz]  
X\_sweep = 9.38438438 [kHz]  
Irr\_domain = 1H  
Irr\_freq = 500.15991521 [MHz]  
Irr\_offset = 5.0 [ppm]  
Irr\_domain = 1H  
Irr\_freq = 500.15991521 [MHz]  
Irr\_offset = 5.0 [ppm]  
Mod\_return = FALSE  
Scans = 1  
Total\_scans = 8

X\_90\_width = 6.24 [us]  
X\_acq\_time = 1.74587904 [s]  
X\_angle = 45 [deg]  
X\_atn = 3.4 [dB]  
X\_pulse = 3.12 [us]  
Irr\_mode = Off  
Irr\_mode = Off  
Dante\_presat = FALSE  
Initial\_wait = 1 [s]  
Recvr\_gain = 54  
Relaxation\_delay = 5 [s]  
Repetition\_time = 6.74587904 [s]  
Temp\_get = 17.1 [dC]

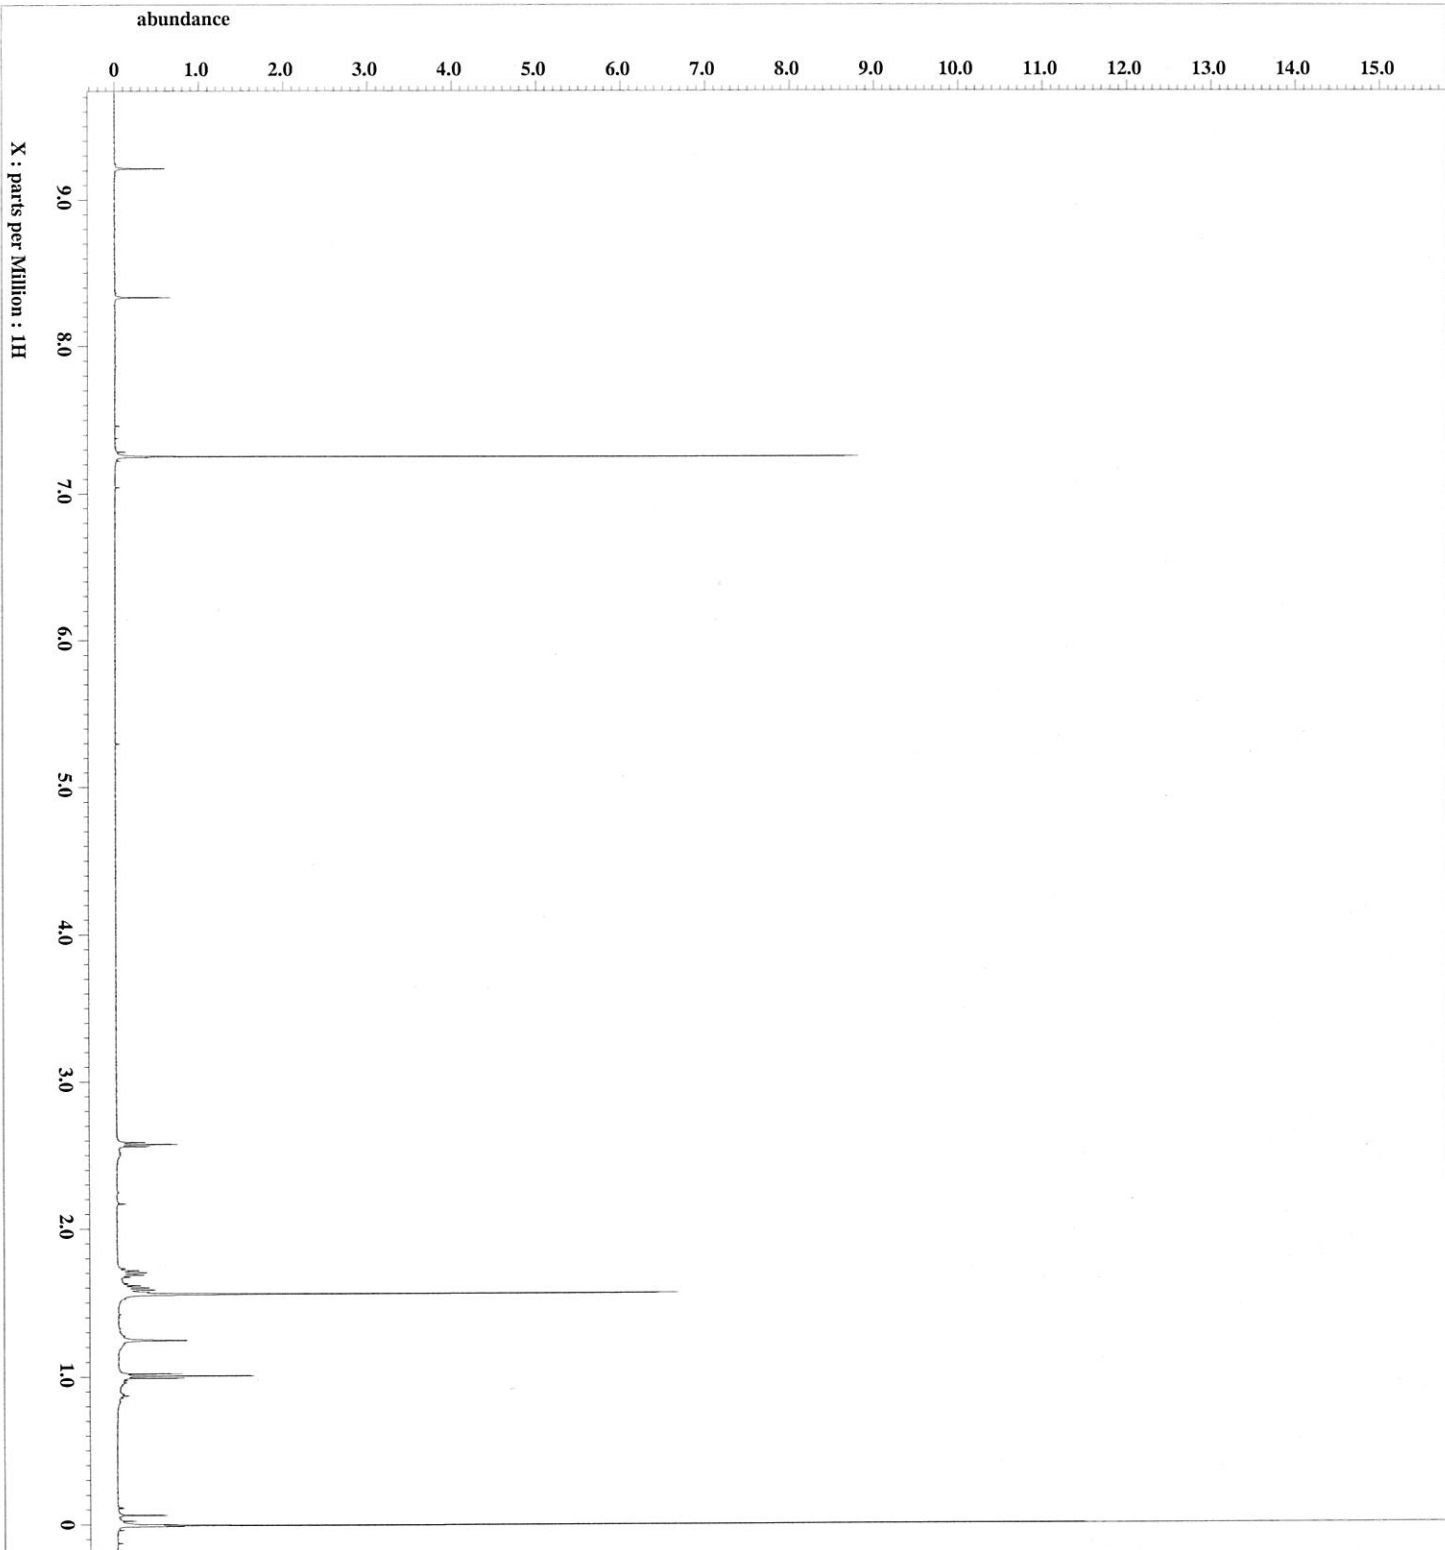

Figure S9. <sup>1</sup>H NMR of 2a.



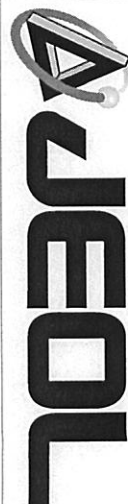

----- PROCESSING PARAMETERS -----  
dc\_balance : 0 : FALSE  
semp : 0.2 [Hz] : 0.0 [s]  
trapzoid3 : 0 [%] : 80 [%] : 100 [%]  
zerofill : 1  
fft : 1 : TRUE : TRUE  
machinphase  
ppm

Filename = 20170531c3h7ph-f-2.fid  
Author = delta  
Experiment = single\_pulse.ex2  
Sample\_id = S#659624  
Solvent = CHLOROFORM-D  
Creation\_time = 31-MAY-2017 16:35:46  
Revision\_time = 7-JUL-2017 19:40:39  
Current\_time = 7-JUL-2017 19:41:07

Comment = single\_pulse  
Data\_format = 1D COMPLEX  
Dim\_size = 13107  
Dim\_title = 1H  
Dim\_units = [ppm]  
Dimensions = X  
Spectrometer = ECA500  
Site = JNM-ECA500

Field\_strength = 11.743579 [T] (500 [MH  
X\_acq\_duration = 1.74587904 [s]  
X\_domain = 1H  
X\_freq = 500.15991521 [MHz]  
X\_offset = 5.0 [ppm]  
X\_points = 16384  
X\_prescans = 1  
X\_resolution = 0.57277737 [Hz]  
X\_sweep = 9.38438438 [kHz]  
Irr\_domain = 1H  
Irr\_freq = 500.15991521 [MHz]  
Irr\_offset = 5.0 [ppm]  
Tri\_domain = 1H  
Tri\_freq = 500.15991521 [MHz]  
Tri\_offset = 5.0 [ppm]  
Clipped = FALSE  
Mod\_return = 1  
Scans = 8  
Total\_scans = 8

X\_90\_width = 6.24 [us]  
X\_acq\_time = 1.74587904 [s]  
X\_angle = 45 [deg]  
X\_atn = 3.4 [db]  
X\_pulse = 3.12 [us]  
Irr\_mode = Off  
Tri\_mode = Off  
Dante\_presat = FALSE  
Initial\_wait = 1 [s]  
Recvr\_gain = 56  
Relaxation\_delay = 5 [s]  
Repetition\_time = 6.74587904 [s]  
Temp\_get = 19.6 [dc]

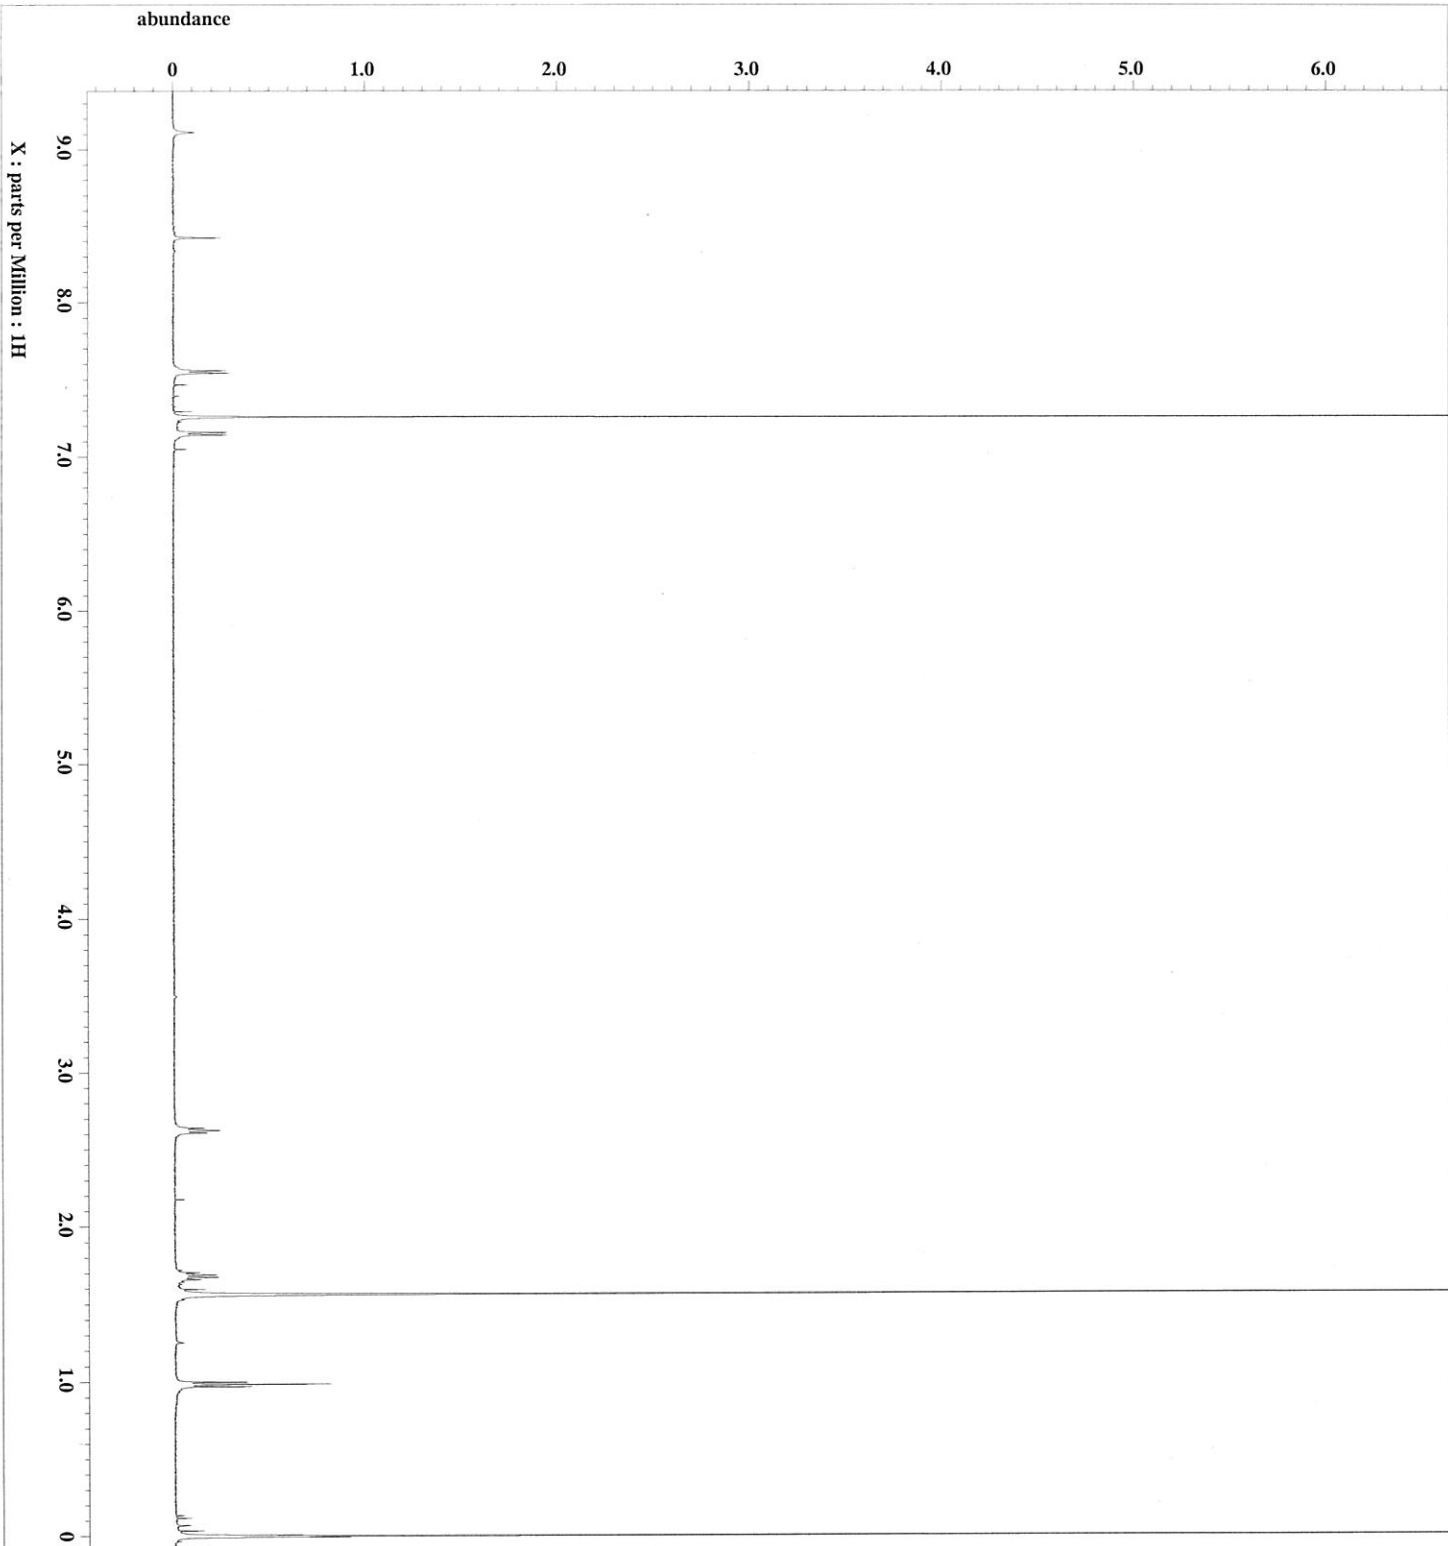

Figure S11. <sup>1</sup>H NMR of 2d.

```

---- PROCESSING PARAMETERS ----
dc balance : 0 : FALSE
smp : 0.2 [Hz] : 0.0 [s]
trapzoid3 : 0 [%] : 80 [%]
zerofill : 1
fft : 1 : TRUE : TRUE
machinephase
ppm
  
```

```

Filename = 20170531c3h7ph-f-2.fid
Author = delta
Experiment = single_pulse.ex2
Sample_id = S#559624
Solvent = CHLOROFORM-D
Creation time = 31-MAY-2017 16:35:46
Revision time = 7-JUL-2017 19:40:39
Current_time = 7-JUL-2017 19:41:31
  
```

```

Comment = single_pulse
Data_format = 1D COMPLEX
Dim_size = 13107
Dim_title = 1H
Dim_units = [ppm]
Dimensions = X
Spectrum = ECA500
Spectrometer = JNM-ECA500
  
```

```

Field_strength = 11.7473579 [T] (500 [MH])
X_acq_duration = 1.74587904 [s]
X_domain = 1H
X_freq = 500.15991521 [MHz]
X_offset = 5.0 [ppm]
X_points = 16384
X_prescans = 1
X_resolution = 0.57277737 [Hz]
X_sweep = 9.38438438 [kHz]
Irr_domain = 1H
Irr_freq = 500.15991521 [MHz]
Irr_offset = 5.0 [ppm]
Tri_domain = 1H
Tri_freq = 500.15991521 [MHz]
Tri_offset = 5.0 [ppm]
Clipped = FALSE
Mod_return = 1
Scans = 8
Total_scans = 8
  
```

```

X_90_width = 6.24 [us]
X_acq_time = 1.74587904 [s]
X_angle = 45 [deg]
X_atn = 3.4 [dB]
X_pulse = 3.12 [us]
Irr_mode = Off
Tri_mode = FALSE
Dante_presat = 1 [s]
Recvr_gain = 56
Relaxation_delay = 5 [s]
Repetition_time = 6.74587904 [s]
Temp_get = 19.6 [dC]
  
```

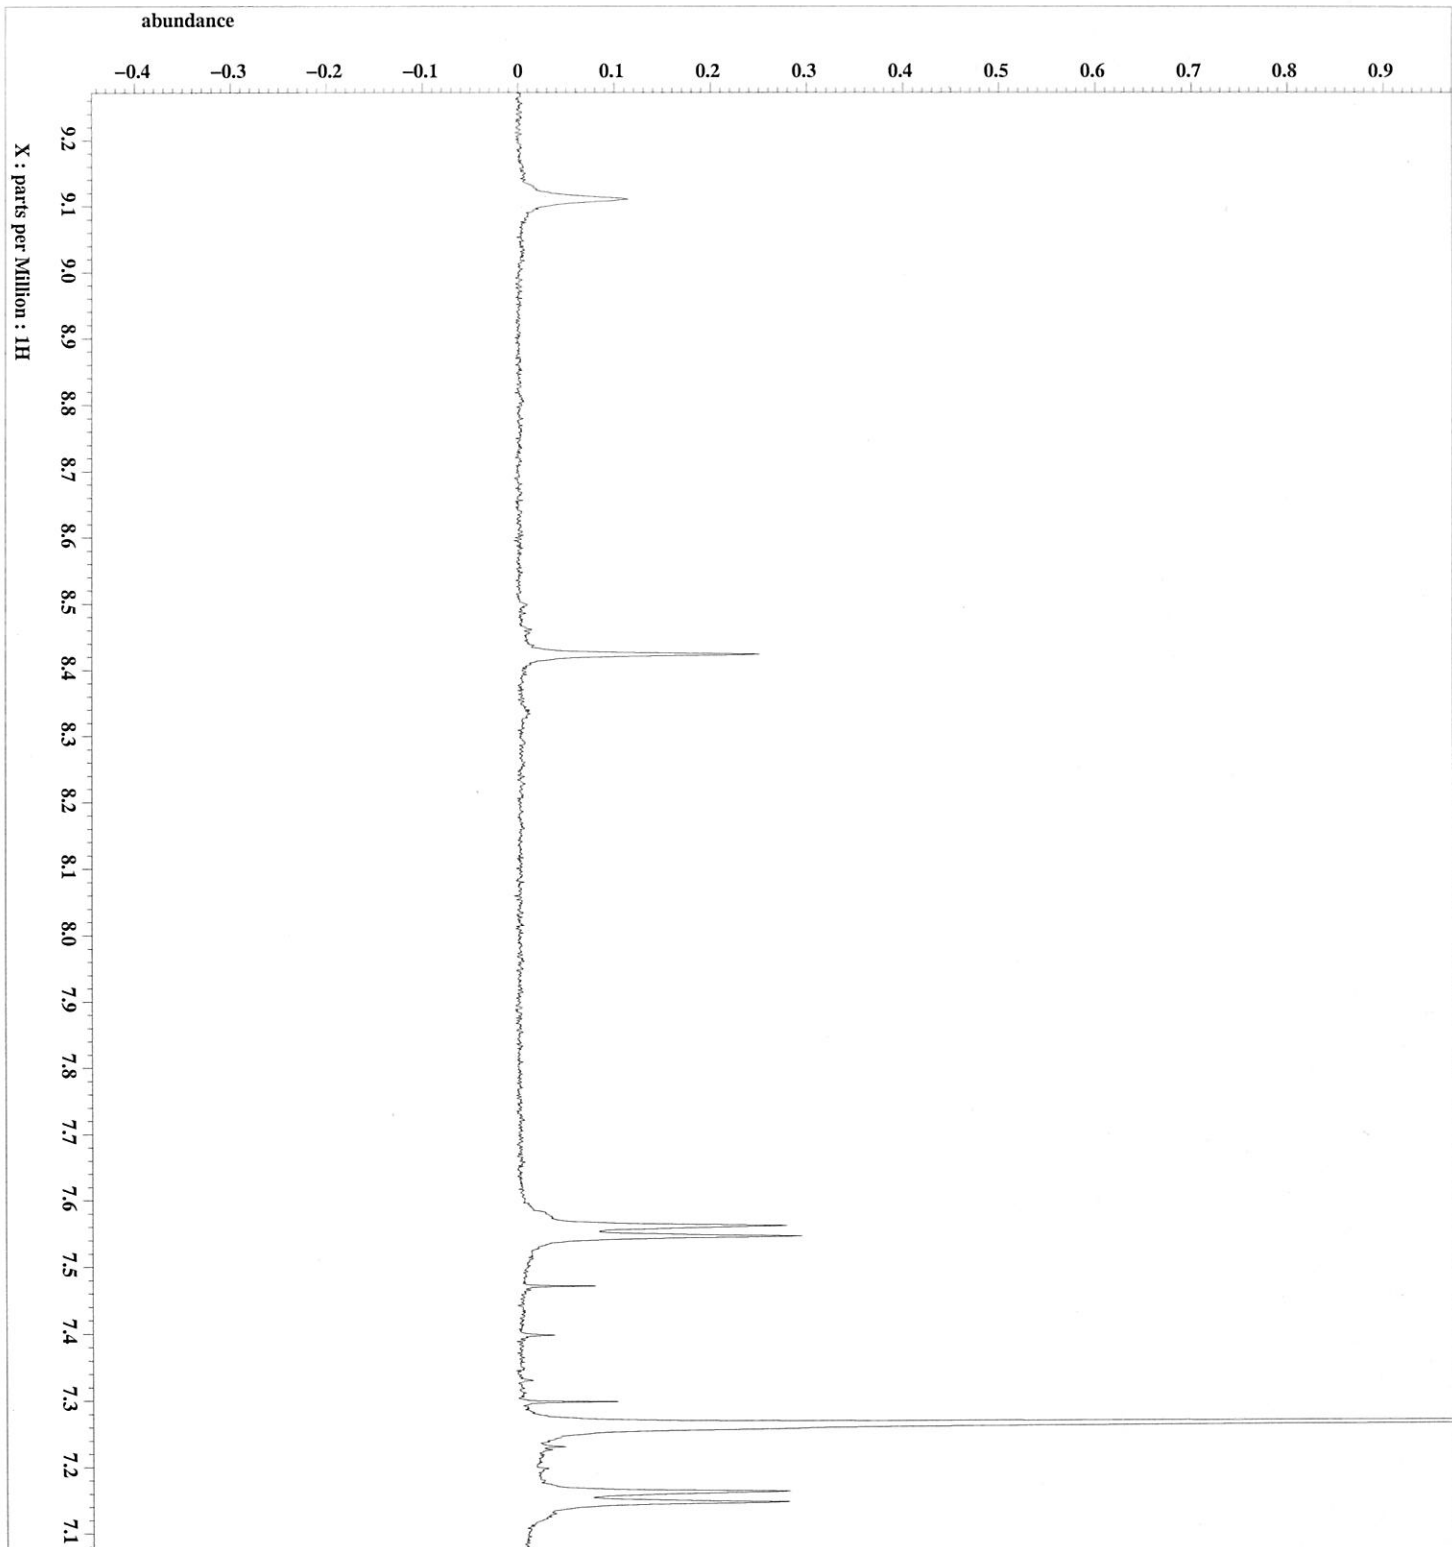

Figure S11. <sup>1</sup>H NMR of 2d (Low-field region).

```

---- PROCESSING PARAMETERS ----
dc balance : 0 : FALSE
semp : 0.2 [Hz] : 0.0 [s]
trapezoid3 : 0 [%] : 80 [%] : 100 [%]
zerofill : 1
fft : 1 : TRUE : TRUE
machinephase
ppm
  
```

```

Filename = 20170531c3h7ph-f-2.fid
Author = delta
Experiment = single_pulse.ex2
Sample_id = S#559624
Solvent = CHLOROFORM-D
Creation time = 31-MAY-2017 16:35:46
Revision time = 7-JUL-2017 19:40:39
Current_time = 7-JUL-2017 19:41:40
  
```

```

Comment = single_pulse
Data_format = 1D COMPLEX
Dim_size = 13107
Dim_title = 1H
Dim_units = [ppm]
Dimensions = X
Site = ECA500
Spectrometer = JNM-ECA500
  
```

```

Field_strength = 11.7473579 [T] (500 [MH
X_acq_duration = 1.74587904 [s]
X_domain = 1H
X_freq = 500.15991521 [MHz]
X_offset = 5.0 [ppm]
X_points = 16384
X_prescans = 1
X_resolution = 0.57227737 [Hz]
X_sweep = 9.38438438 [kHz]
Irr_domain = 1H
Irr_freq = 500.15991521 [MHz]
Irr_offset = 5.0 [ppm]
Tri_domain = 1H
Tri_freq = 500.15991521 [MHz]
Tri_offset = 5.0 [ppm]
Clipped = FALSE
Mod_return = 1
Scans = 8
Total_scans = 8
  
```

```

X_90_width = 6.24 [us]
X_acq_time = 1.74587904 [s]
X_angle = 45 [deg]
X_atn = 3.4 [db]
X_pulse = 3.12 [us]
Irr_mode = Off
Tri_mode = OFF
Dance_presat = FALSE
Initial_wait = 1 [s]
Recvr_gain = 56
Relaxation_delay = 5 [s]
Repetition_time = 6.74587904 [s]
Temp_get = 19.6 [dcl]
  
```

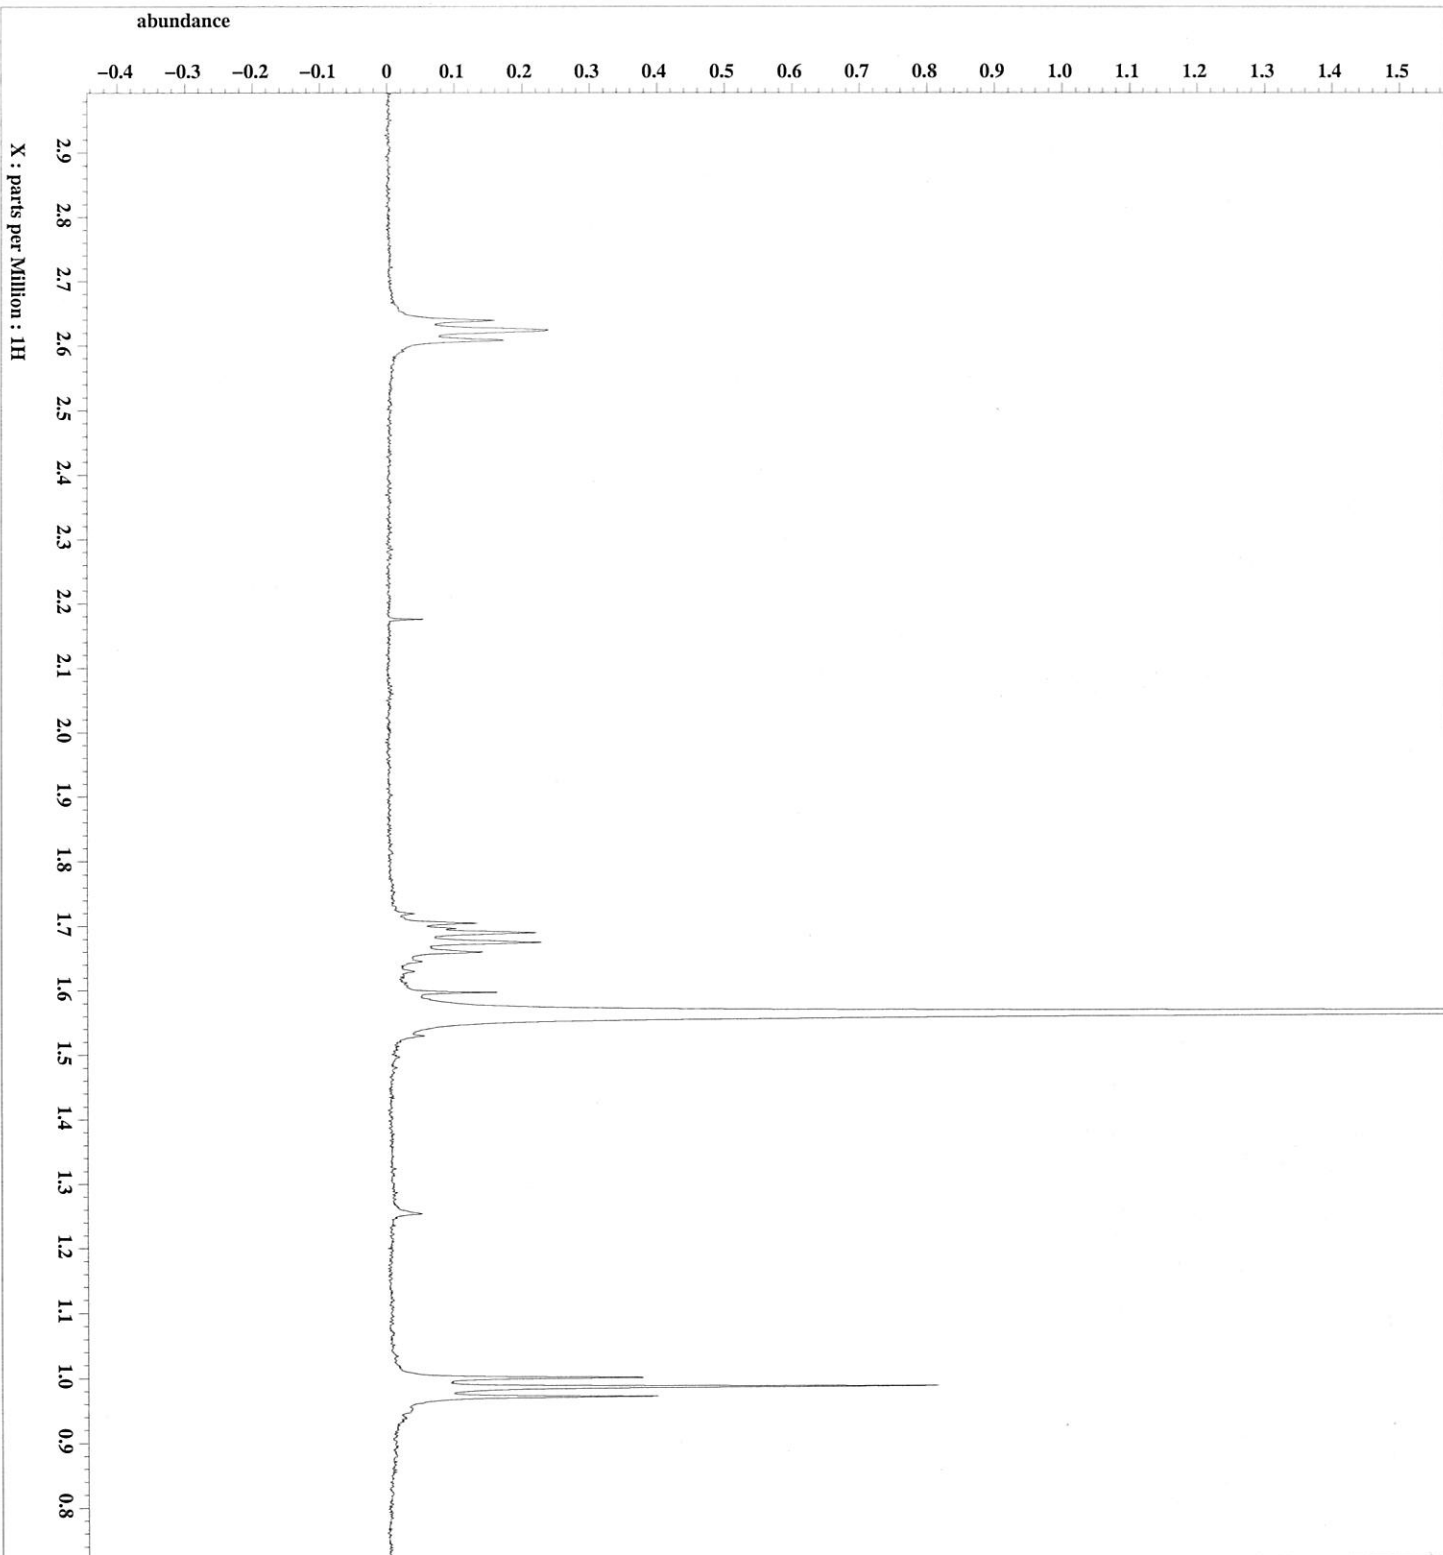

Figure S11. <sup>1</sup>H NMR of **2d** (Up-field region).



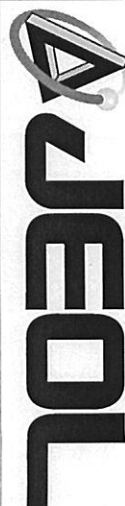

----- PROCESSING PARAMETERS -----  
dc\_balance : 0 : FALSE  
semp : 0.2 [Hz] : 0.0 [s]  
trapzoid3 : 0 [%] : 80 [%] : 100 [%]  
zerofill : 1  
f1c : 1 : TRUE : TRUE  
machinephase  
ppm

Filename = 20170510c6h13ph-f-2.f  
Author = delta  
Experiment = single\_pulse.ex2  
Sample\_id = S#771540  
Solvent = CHLOROFORM-D  
Creation\_time = 10-MAY-2017 19:44:38  
Revision\_time = 7-JUL-2017 19:44:52  
Current\_time = 7-JUL-2017 19:46:02

Comment = single\_pulse  
Data\_format = 1D COMPLEX  
Dim\_size = 13107  
Dim\_title = 1H  
Dim\_units = [ppm]  
Dimensions = X  
Site = ECA500  
Spectrometer = JNM-ECA500

Field\_strength = 11.7473579 [T] (500 [MH  
X\_acq\_duration = 1.74587904 [s]  
X\_domain = 1H  
X\_freq = 500.15991521 [MHz]  
X\_offset = 5.0 [ppm]  
X\_points = 16384  
X\_prescans = 1  
X\_resolution = 0.57277737 [Hz]  
X\_sweep = 9.38438438 [kHz]  
Irr\_domain = 1H  
Irr\_freq = 500.15991521 [MHz]  
Irr\_offset = 5.0 [ppm]  
Tri\_domain = 1H  
Tri\_freq = 500.15991521 [MHz]  
Tri\_offset = 5.0 [ppm]  
Clipped = FALSE  
Mod\_return = 1  
Scans = 8  
Tocal\_scans = 8

X\_90\_width = 6.24 [us]  
X\_acq\_time = 1.74587904 [s]  
X\_angle = 45 [deg]  
X\_atn = 3.4 [db]  
X\_pulse = 3.12 [us]  
Irr\_mode = Off  
Tri\_mode = Off  
Dante\_presat = FALSE  
Initial\_wait = 1 [s]  
Recvr\_gain = 54  
Relaxation\_delay = 5 [s]  
Repetition\_time = 6.74587904 [s]  
Temp\_get = 20.9 [dcl]

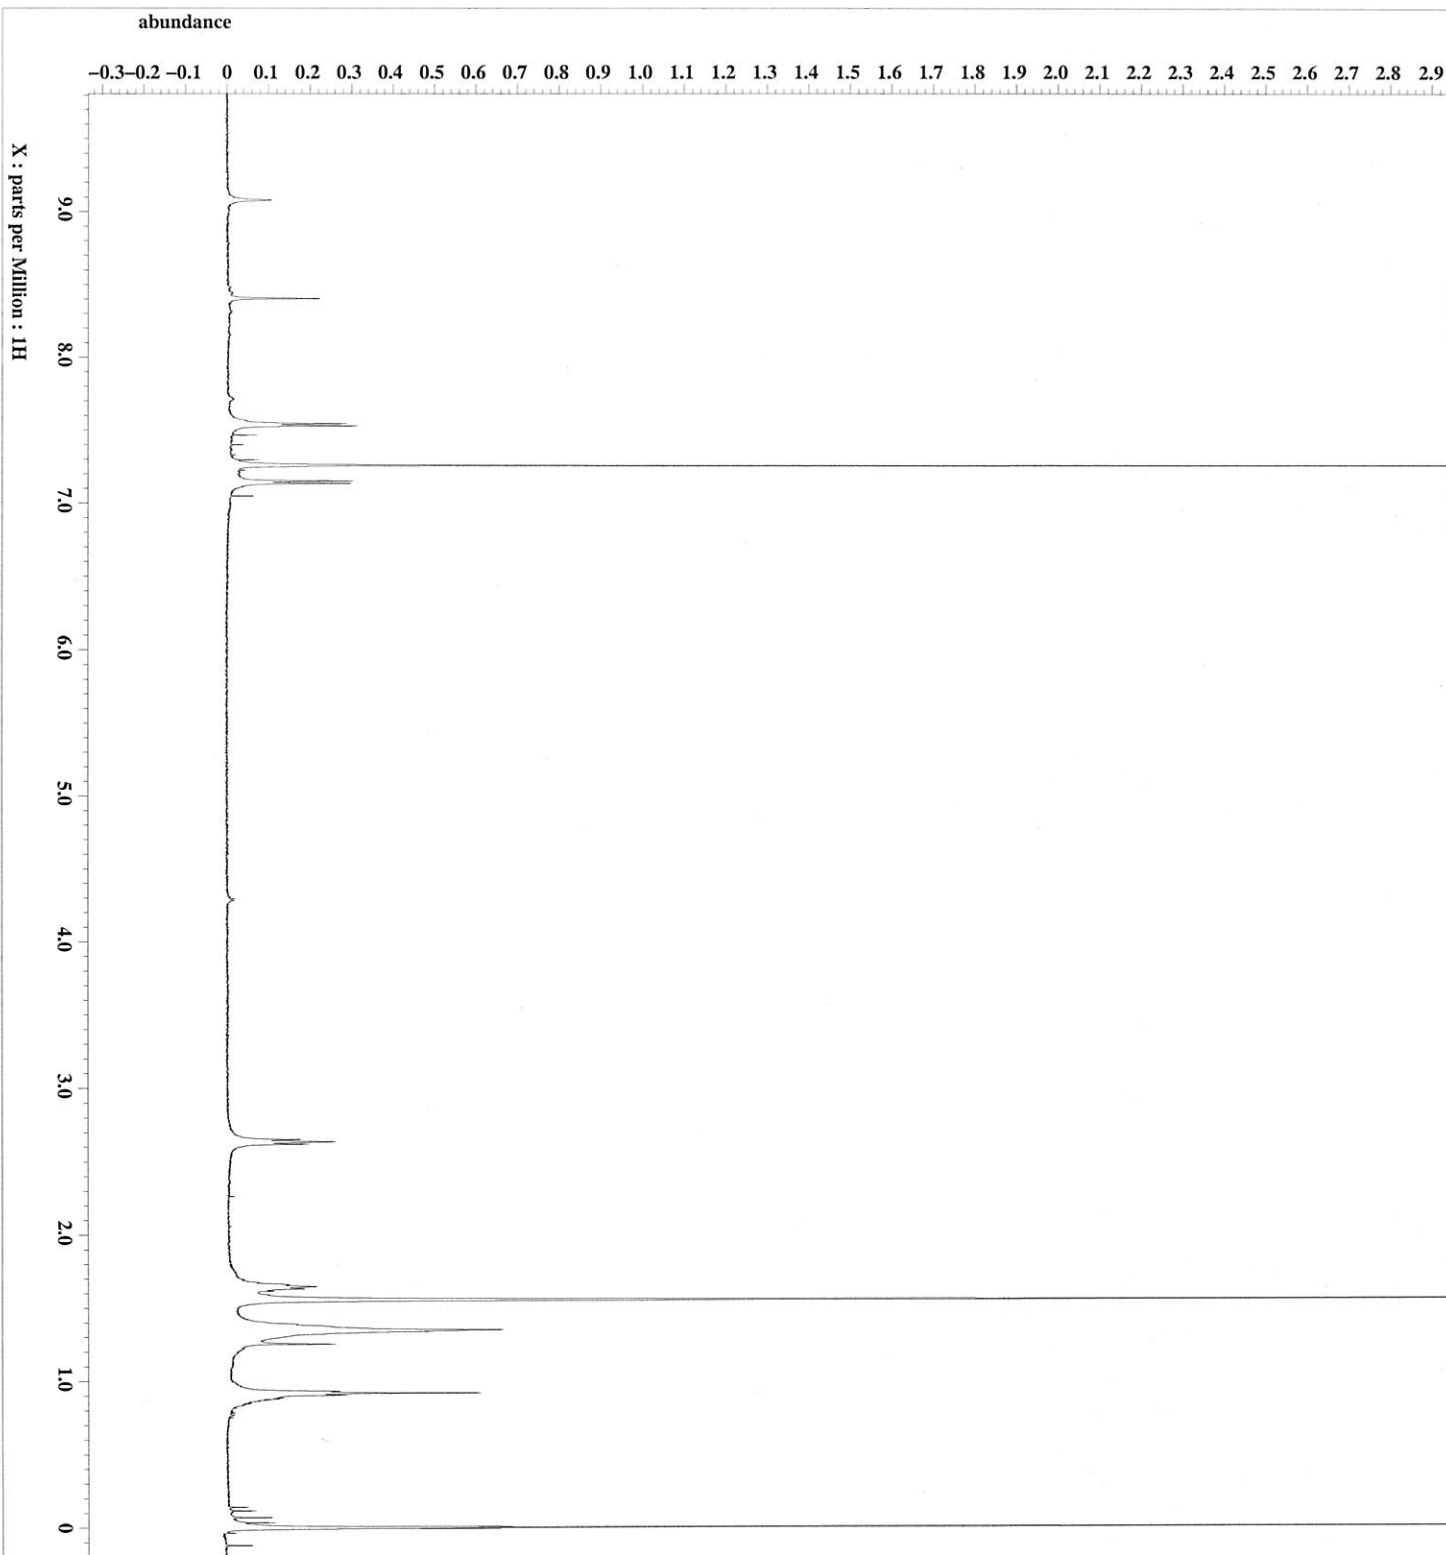

Figure S12. <sup>1</sup>H NMR of 2e.

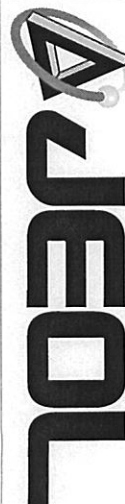

----- PROCESSING PARAMETERS -----  
dc\_balance : 0 : FALSE  
semp : 0.2 [Hz] : 0.0 [s]  
trapzoid3 : 0 [%] : 80 [%] : 100 [%]  
zerofill : 1  
fft : 1 : TRUE : TRUE  
machinephase  
ppm

Filename = 20170224CGH130Pn-F-2.  
Author = delta  
Experiment = single\_pulse\_ex2  
Sample\_id = S#630814  
Solvent = CHLOROFORM-D  
Creation\_time = 24-FEB-2017 15:58:37  
Revision\_time = 7-JUL-2017 19:49:01  
Current\_time = 7-JUL-2017 19:49:23

Comment = single\_pulse  
Data\_format = 1D COMPLEX  
Dim\_size = 13107  
Dim\_title = 1H  
Dim\_units = [ppm]  
Dimensions = X  
Site = ECA500  
Spectrometer = JNM-ECA500

Field\_strength = 11.7473579 [T] (500 [MH  
X\_acq\_duration = 1.74587904 [s]  
X\_domain = 1H  
X\_freq = 500.15991521 [MHz]  
X\_offset = 5.0 [ppm]  
X\_points = 16384  
X\_prescans = 1  
X\_resolution = 0.57277737 [Hz]  
X\_sweep = 9.38438438 [kHz]  
Irr\_domain = 1H  
Irr\_freq = 500.15991521 [MHz]  
Irr\_offset = 5.0 [ppm]  
Tri\_domain = 1H  
Tri\_freq = 500.15991521 [MHz]  
Tri\_offset = 5.0 [ppm]  
Clipped = FALSE  
Mod\_return = 1  
Scans = 8  
Total\_scans = 8

X\_90\_width = 6.24 [us]  
X\_acq\_time = 1.74587904 [s]  
X\_angle = 45 [deg]  
X\_atn = 3.4 [db]  
X\_pulse = 3.12 [us]  
Irr\_mode = Off  
Tri\_mode = Off  
Dante\_presat = FALSE  
Initial\_wait = 1 [s]  
Recvr\_gain = 54  
Relaxation\_delay = 5 [s]  
Repetition\_time = 6.74587904 [s]  
Temp\_set = 21.1 [dcl]

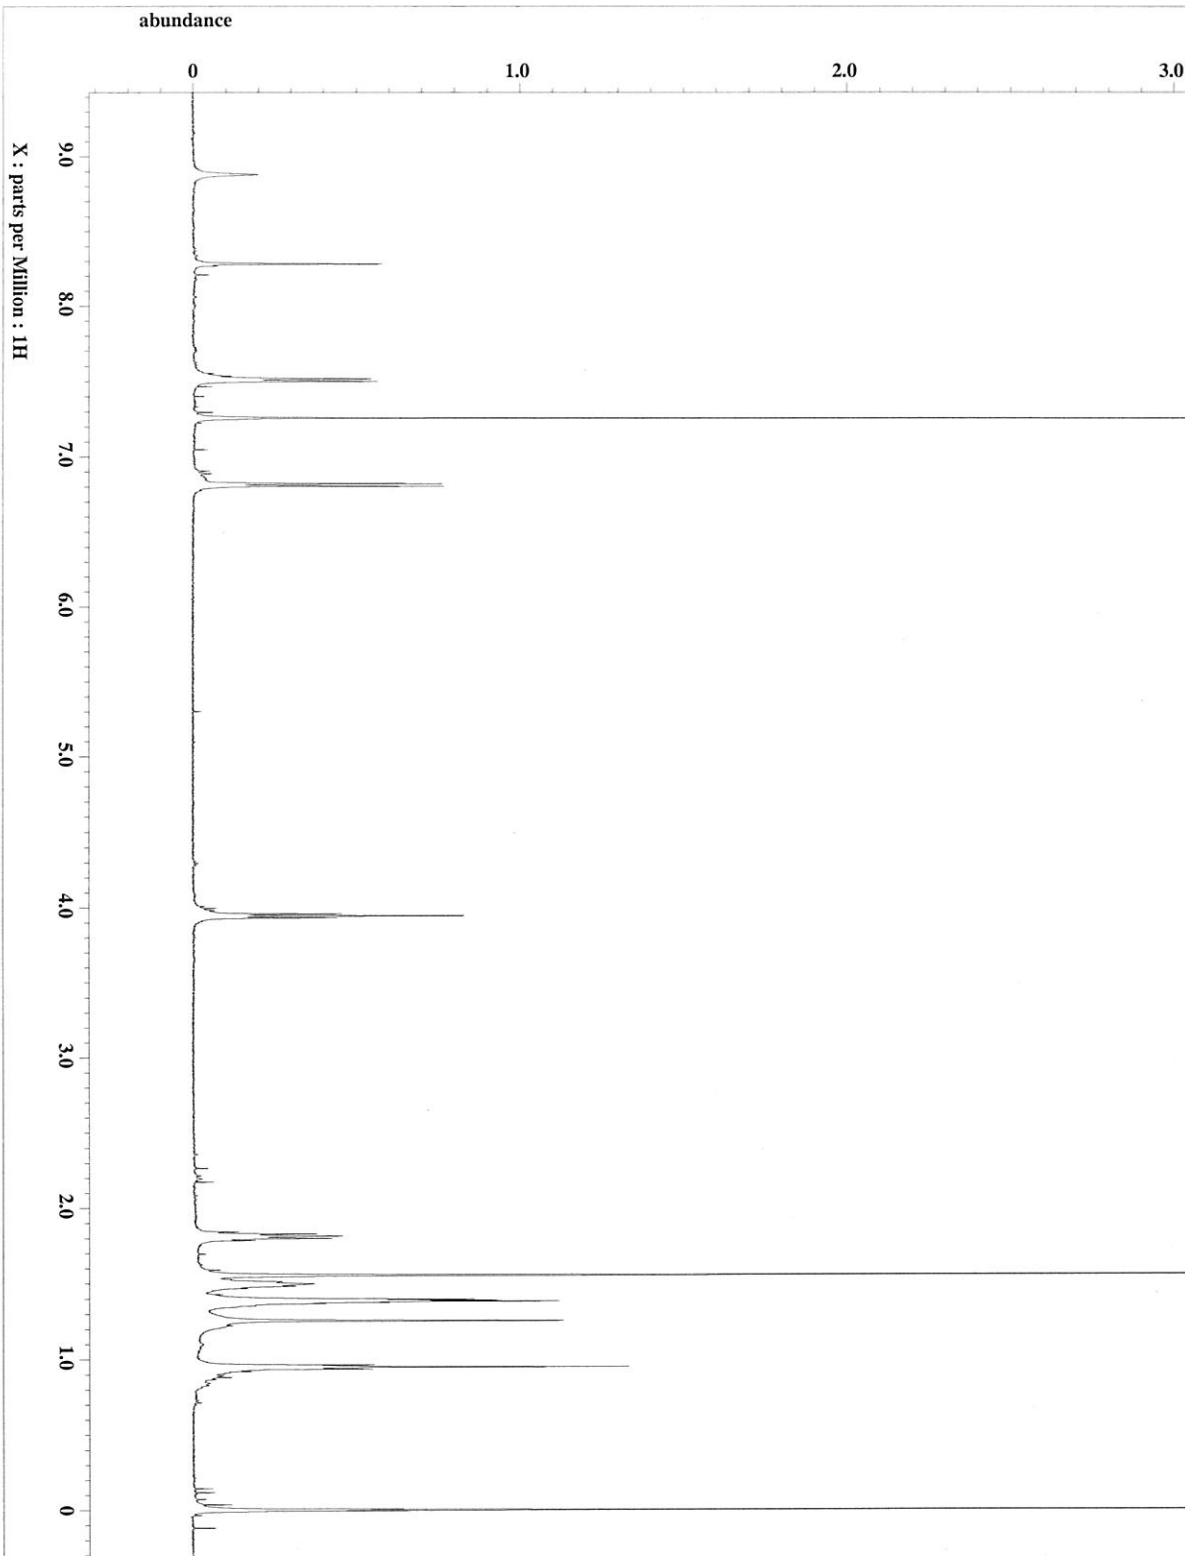

Figure S13. <sup>1</sup>H NMR of 2f.

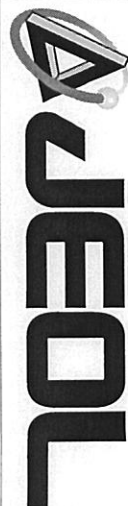

----- PROCESSING PARAMETERS -----  
dc\_balance : 0 : FALSE  
temp : 0.2 [Hz] : 0.0 [s]  
tzero[id3] : 0 [%] : 80 [%] : 100 [%]  
zero[fill] : 1  
fft : 1 : TRUE : TRUE  
machinephase  
ppm

Filename = 20170419 (C6H13O) 3Pb-F  
Author = delta  
Experiment = single\_pulse.ex2  
Sample\_id = S#568103  
Solvent = CHLOROFORM-D  
Creation time = 19-APR-2017 14:07:47  
Revision time = 7-JUL-2017 19:51:20  
Current\_time = 7-JUL-2017 19:51:50

Comment = single\_pulse  
Data\_format = 1D COMPLEX  
Dim\_size = 13107  
Dim\_title = 1H  
Dim\_units = [ppm]  
Dimensions = X  
Site = ECA500  
Spectrometer = JNM-ECA500

Field\_strength = 11.7473579 [T] (500 [MH  
X\_acq\_duration = 1.74587904 [s]  
X\_domain = 1H  
X\_freq = 500.15991521 [MHz]  
X\_offset = 5.0 [ppm]  
X\_points = 16384  
X\_prescans = 1  
X\_resolution = 0.57277737 [Hz]  
X\_sweep = 9.38438438 [kHz]  
Irr\_domain = 1H  
Irr\_freq = 500.15991521 [MHz]  
Irr\_offset = 5.0 [ppm]  
Tri\_domain = 1H  
Tri\_freq = 500.15991521 [MHz]  
Tri\_offset = 5.0 [ppm]  
Clipped = FALSE  
Mod\_return = 1  
Scans = 8  
Total\_scans = 8  
X\_90\_width = 6.24 [us]  
X\_acq\_time = 1.74587904 [s]  
X\_angle = 45 [deg]  
X\_atn = 3.4 [db]  
X\_pulse = 3.13 [us]  
Irr\_mode = Off  
Tri\_mode = Off  
Dante\_presat = FALSE  
Initial\_wait = 1 [s]  
Recvr\_gain = 40  
Relaxation\_delay = 5 [s]  
Repetition\_time = 6.74587904 [s]  
Temp\_get = 21.7 [dC]

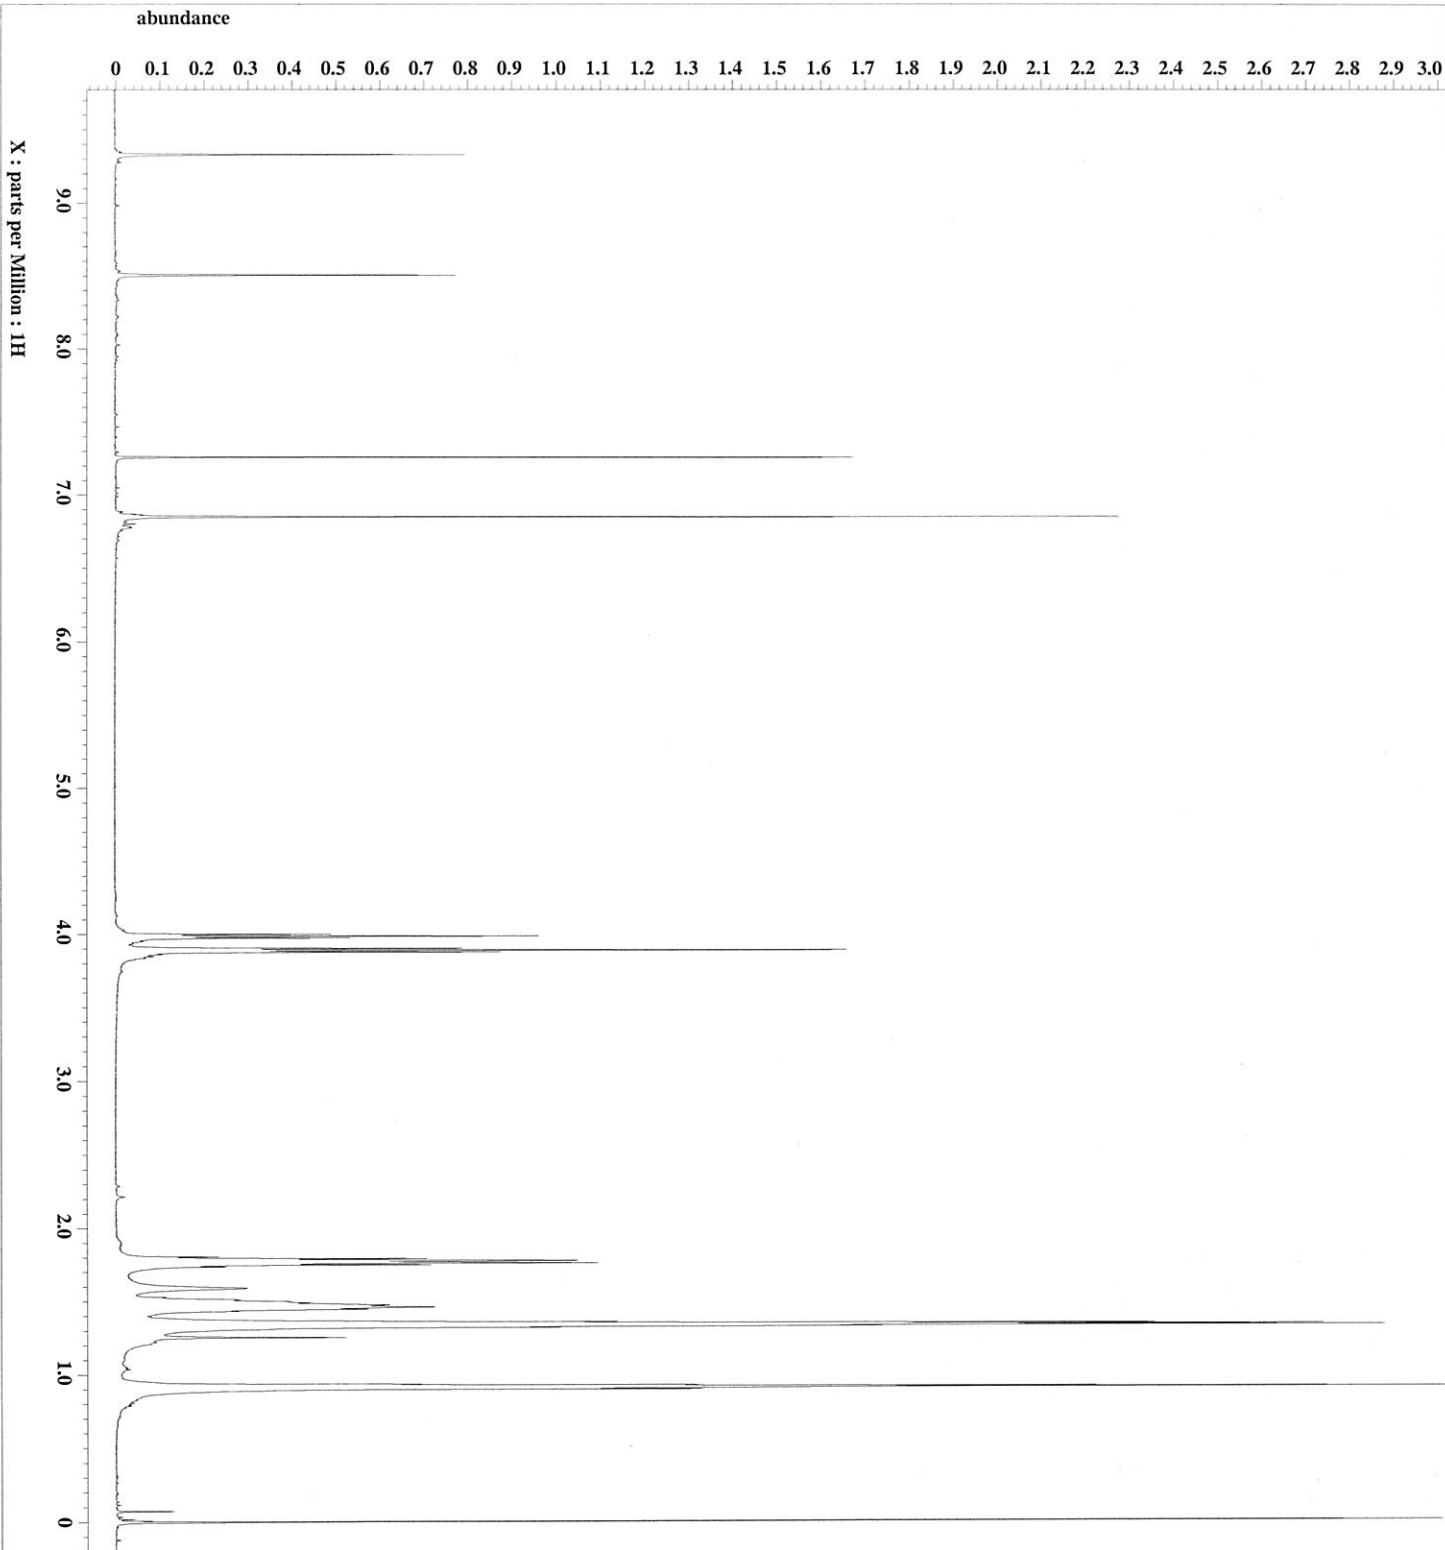

Figure S14. <sup>1</sup>H NMR of 2g.



```

---- PROCESSING PARAMETERS ----
dc balance : 0 : FALSE
sepd : 2.0 [Hz] : 0.0 [s]
t1rho3 : 0 [s] : 80 [%] : 100 [%]
zerofill : 1
fft : 1 : TRUE : TRUE
machinephase
dpm
  
```

```

Filename = 20170419 (C6H13O) 3ph-F
Author = delta
Experiment = single_pulse_dec
Sample_id = S#572271
Solvent = CHLOROFORM-D
Creation_time = 19-APR-2017 15:29:04
Revision_time = 7-JUL-2017 19:52:13
Current_time = 7-JUL-2017 19:53:20
  
```

```

Comment = single pulse decouple
Data_format = 1D COMPLEX
Dim_size = 26214
Dim_title = 13C
Dim_units = [ppm]
Dimensions = X
Site = ECA500
Spectrometer = JNM-ECA500
  
```

```

Field_strength = 11.7473579 [T] (500 [MH]
X_acq_duration = 0.83361792 [s]
X_domain = 13C
X_freq = 125.76529768 [MHz]
X_offset = 100 [ppm]
X_points = 32768
X_prescans = 4
X_resolution = 1.19959034 [Hz]
X_sweep = 39.3081761 [kHz]
Irr_domain = 1H
Irr_freq = 500.15991521 [MHz]
Irr_offset = 5.0 [ppm]
Clipped = FALSE
Mod_return = 1
Scans = 1600
rotal_scans = 1600
  
```

```

X_90_width = 10.87 [us]
X_acq_time = 0.83361792 [s]
X_angle = 30 [deg]
X_atn = 6.5 [dB]
X_pulse = 3.62333333 [us]
Irr_atn_dec = 26.772 [dB]
Irr_atn_noe = 26.772 [dB]
Irr_noise = WALTZ
Decoupling = TRUE
Initial_wait = 1 [s]
Noe_time = TRUE
Noe_wait = 2 [s]
Recvr_gain = 50
Relaxation_delay = 2 [s]
Repetition_time = 2.83361792 [s]
Temp_get = 19.8 [dc]
  
```

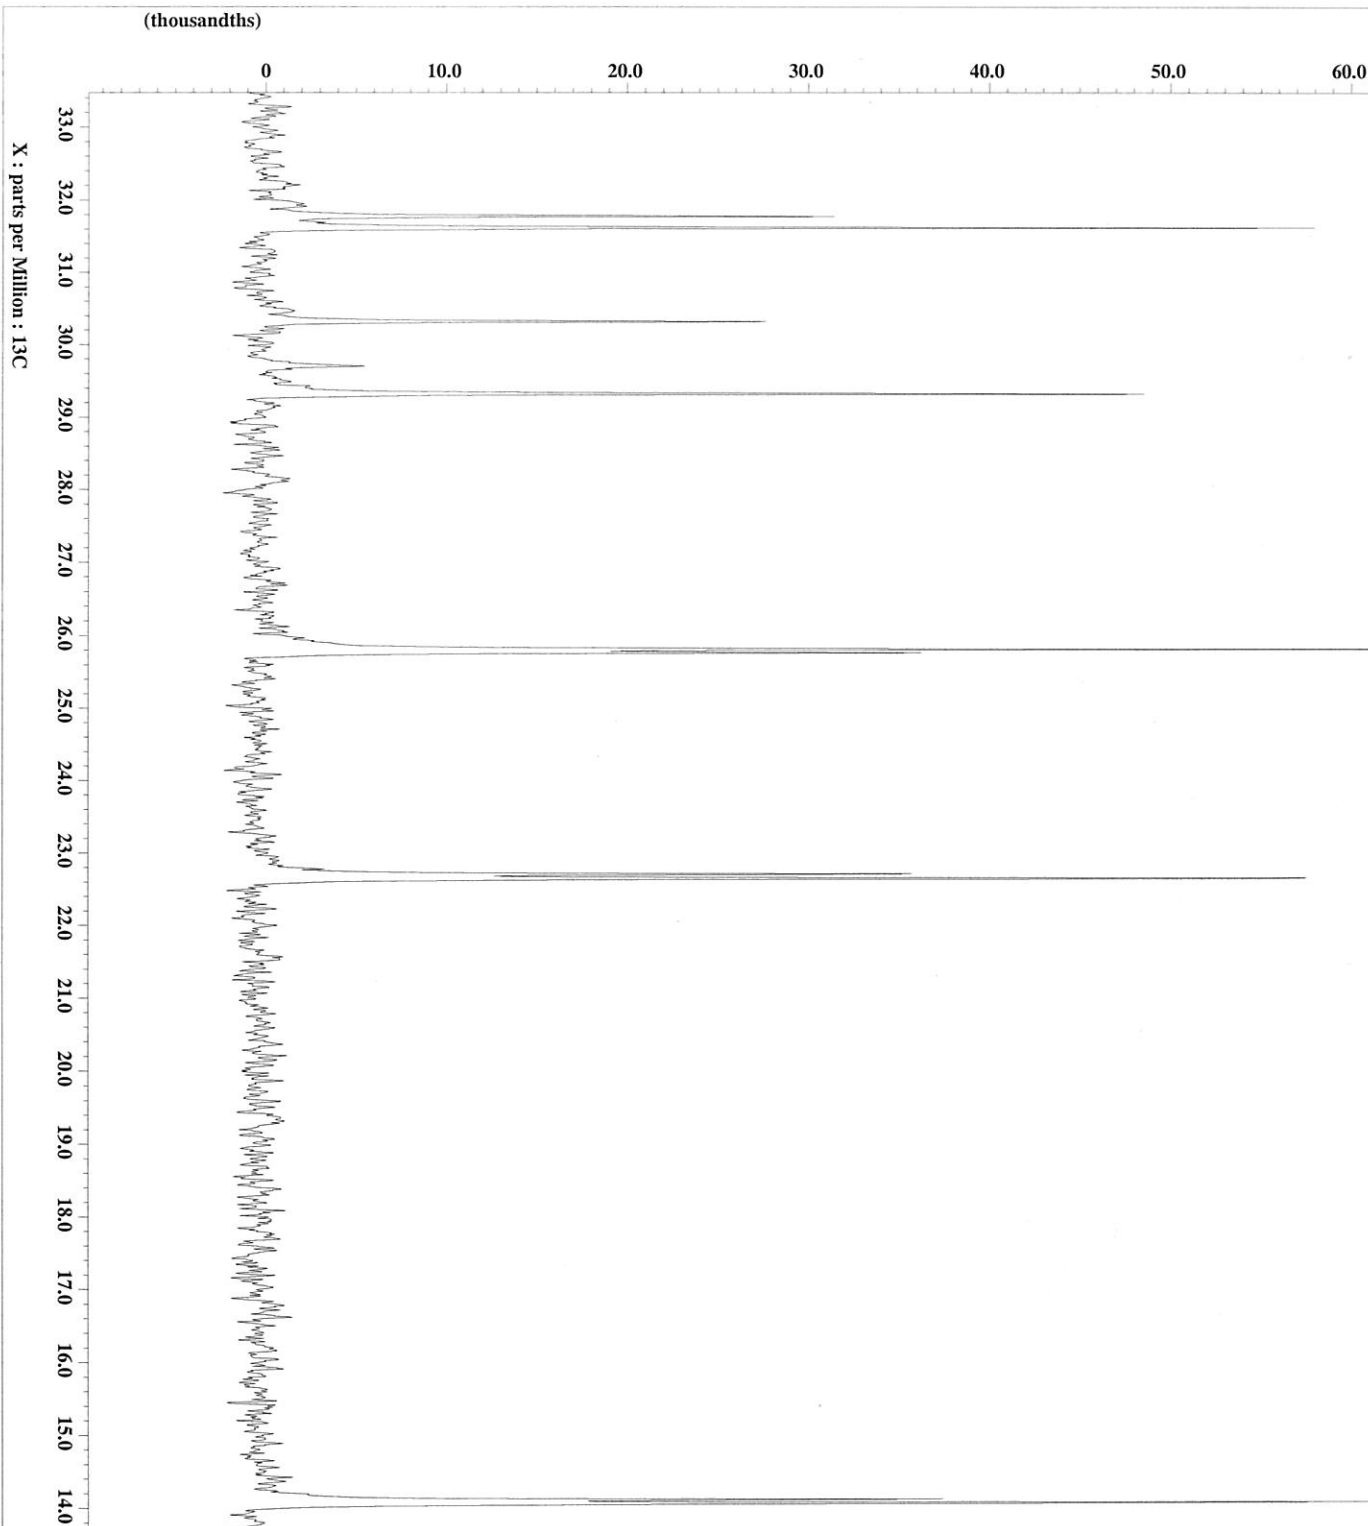

Figure S15. <sup>13</sup>C NMR of **2g** (Up-field region).

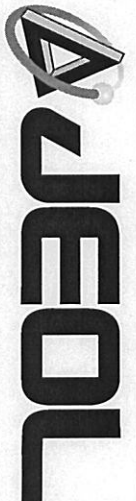

----- PROCESSING PARAMETERS -----  
dc\_balance : 0 : FALSE  
sweep : 0.2 [Hz] : 0.0 [s]  
creep\_ratio : 0 [%] : 80 [%] : 100 [%]  
zero\_fill : 1  
ift : 1 : TRUE : TRUE  
machinephase  
ppm

Filename = 20170203BE-Ph345 (OC6H  
Author = delta  
Experiment = single\_pulse.ex2  
Sample\_id = S#498241  
Solvent = CHLOROFORM-D  
Creation\_time = 3-FEB-2017 12:18:58  
Revision\_time = 7-JUL-2017 20:05:39  
Current\_time = 7-JUL-2017 20:06:03

Comment = single\_pulse  
Data\_format = 1D COMPLEX  
Dim\_size = 13107  
Dim\_title = 1H  
Dim\_units = [ppm]  
Dimensions = X  
Site = ECA500  
Spectrometer = JNM-ECA500

Field\_strength = 11.7473579 [T] (500 [MH  
X\_acq\_duration = 1.74587904 [s]  
X\_domain = 1H  
X\_freq = 500.15991521 [MHz]  
X\_offset = 5.0 [ppm]  
X\_points = 16384  
X\_prescans = 1  
X\_resolution = 0.5727737 [Hz]  
X\_sweep = 9.38438438 [kHz]  
Irr\_domain = 1H  
Irr\_freq = 500.15991521 [MHz]  
Irr\_offset = 5.0 [ppm]  
Tri\_domain = 1H  
Tri\_freq = 500.15991521 [MHz]  
Tri\_offset = 5.0 [ppm]  
Clipped = FALSE  
Mod\_return = 1  
Scans = 8  
Total\_scans = 8

X\_90\_width = 6.24 [us]  
X\_acq\_time = 1.74587904 [s]  
X\_angle = 45 [deg]  
X\_atn = 3.4 [ds]  
X\_pulse = 3.12 [us]  
Irr\_mode = Off  
Tri\_mode = Off  
Dante\_preset = FALSE  
Initial\_wait = 1 [s]  
Recur\_gain = 32  
Relaxation\_delay = 5 [s]  
Repetition\_time = 6.74587904 [s]  
Temp\_get = 20.5 [dc]

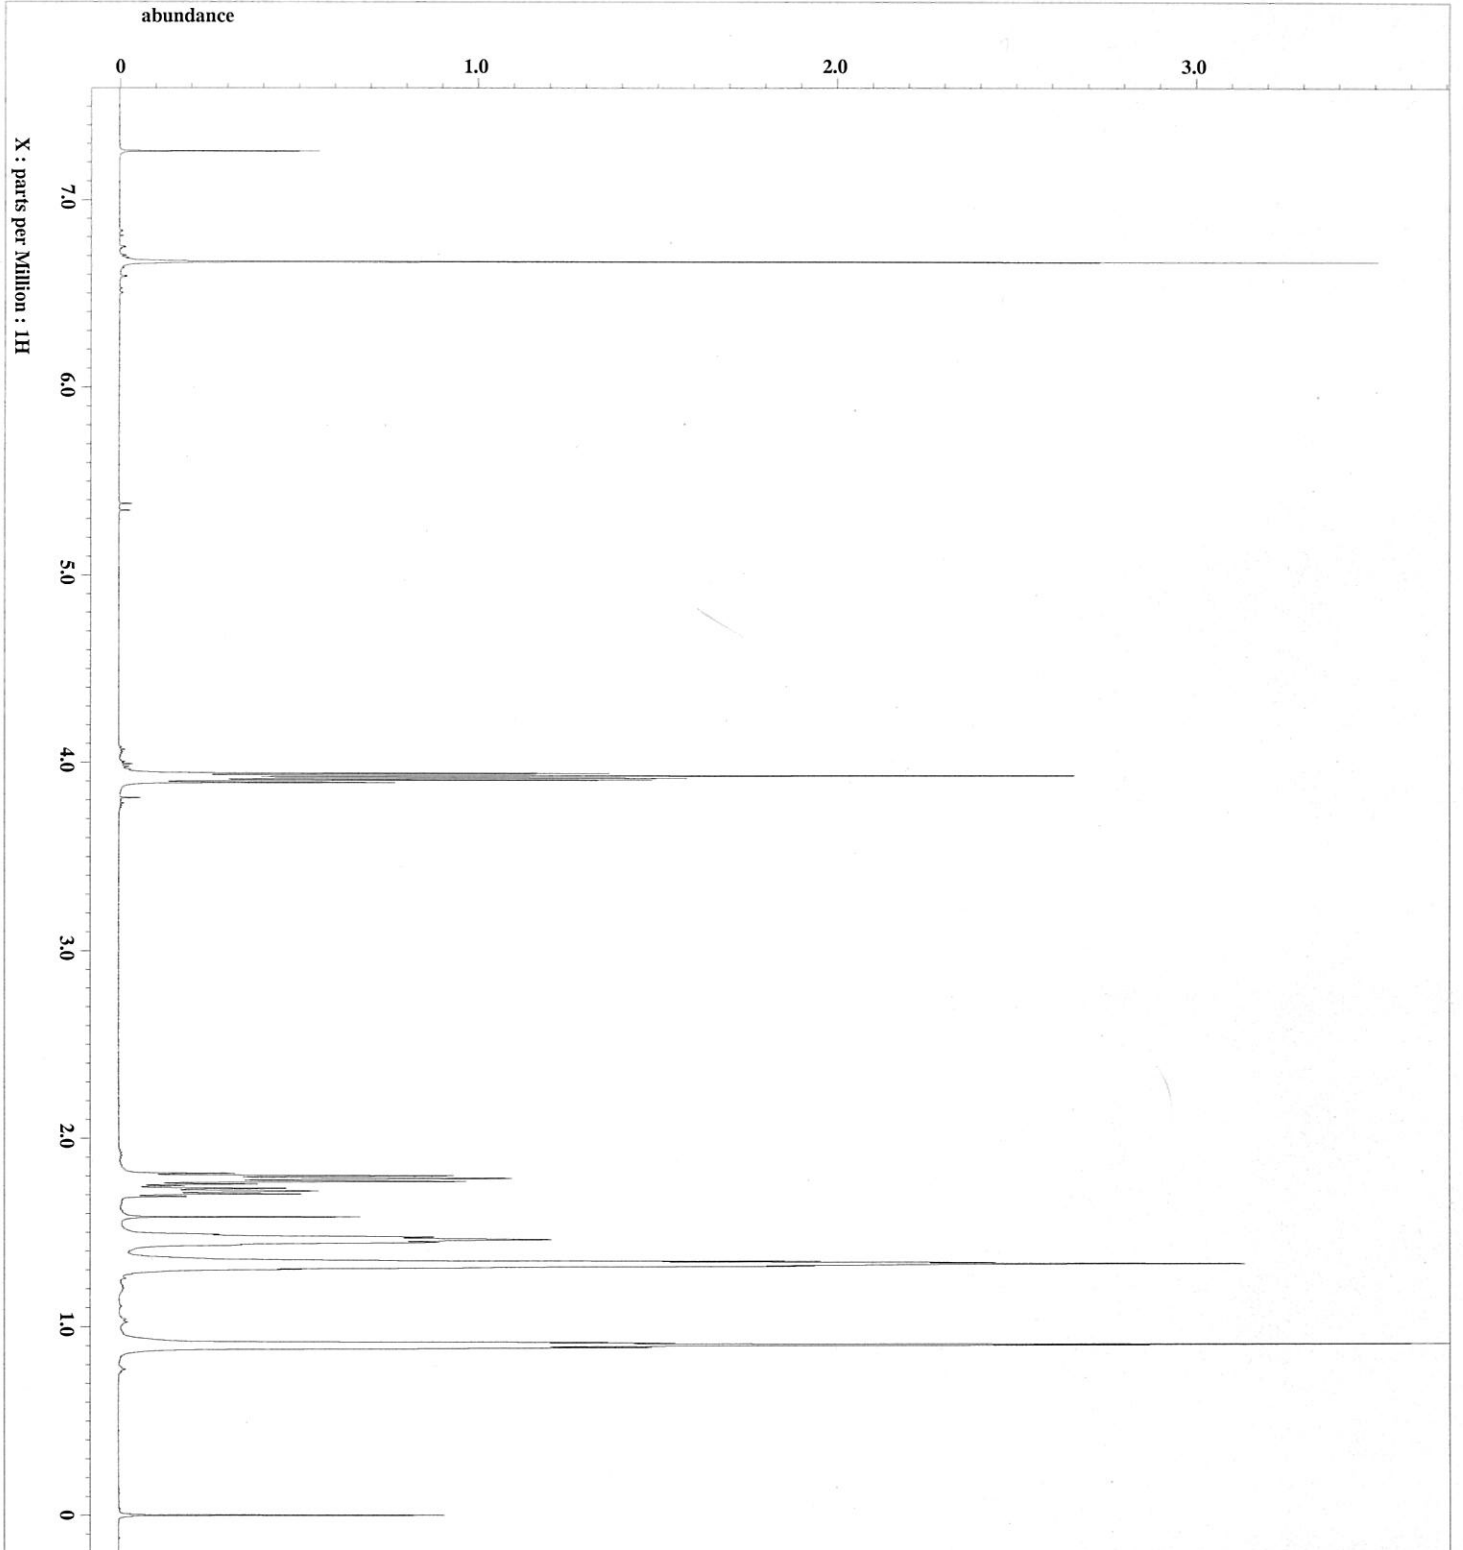

Figure S16. <sup>1</sup>H NMR of 13.

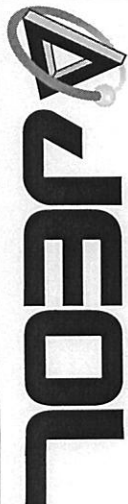

----- PROCESSING PARAMETERS -----  
dc\_balance : 0 : FALSE  
secp : 0.2 [Hz] : 0.0 [Hz]  
trapzoid3 : 0 [%] : 80 [%] : 100 [%]  
zerofill : 1  
fft : 1 : TRUE : TRUE  
machinephase  
ppm

Filename = 20170217trimethyl1SI-P  
Author = delta  
Experiment = single\_pulse.ex2  
Sample\_id = S#770023  
Solvent = CHLOROFORM-D  
Creation\_time = 17-FEB-2017 19:50:48  
Revision\_time = 7-JUL-2017 20:08:45  
Current\_time = 7-JUL-2017 20:09:06

Comment = single\_pulse  
Data\_format = 1D COMPLEX  
Dim\_size = 13107  
Dim\_title = 1H  
Dim\_units = [ppm]  
Dimensions = X  
Site = ECA500  
Spectrometer = JNM-ECA500

Field\_strength = 11.7473579 [T] (500 [MH  
X\_acq\_duration = 1.74587904 [s]  
X\_domain = 1H  
X\_freq = 500.15991521 [MHz]  
X\_offset = 5.0 [ppm]  
X\_points = 16384  
X\_prescans = 1  
X\_resolution = 0.57277737 [Hz]  
X\_sweep = 9.38438438 [kHz]  
Irr\_domain = 1H  
Irr\_freq = 500.15991521 [MHz]  
Irr\_offset = 5.0 [ppm]  
Irr\_domain = 1H  
Irr\_freq = 500.15991521 [MHz]  
Irr\_offset = 5.0 [ppm]  
Clipped = FALSE  
Mod\_return = 1  
Scans = 8  
Total\_scans = 8

X\_90\_width = 6.24 [us]  
X\_acq\_time = 1.74587904 [s]  
X\_angle = 45 [deg]  
X\_atn = 3.4 [dB]  
X\_pulse = 3.12 [us]  
Irr\_mode = Off  
Irr\_mods = Off  
Dante\_presat = FALSE  
Initial\_wait = 1 [s]  
Recvr\_gain = 42  
Relaxation\_delay = 5 [s]  
Repetition\_time = 6.74587904 [s]  
Temp\_get = 20.5 [dC]

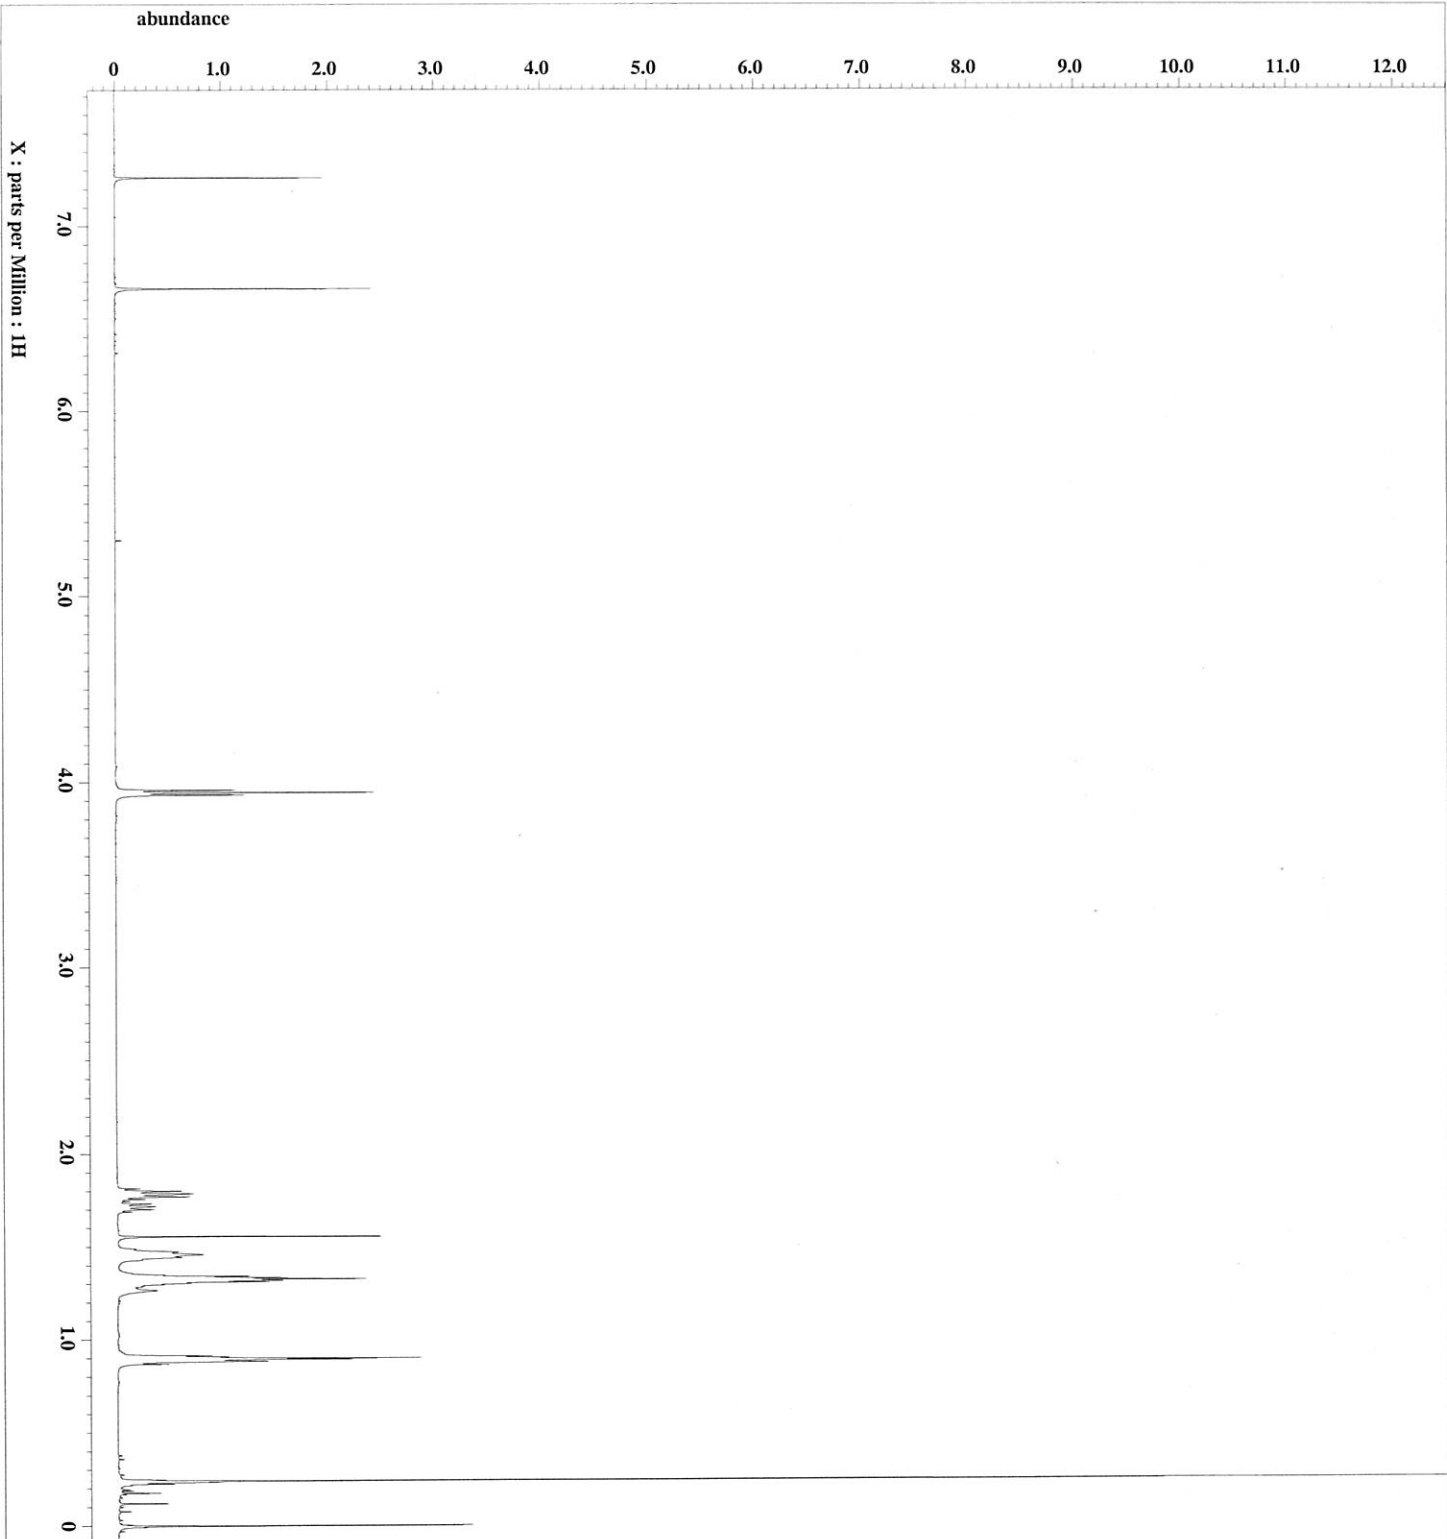

Figure S17. <sup>1</sup>H NMR of 14.

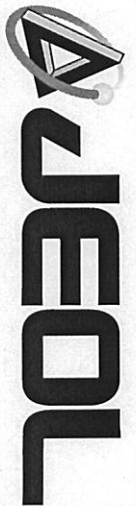

```

----- PROCESSING PARAMETERS -----
dc_balance : 0 : FALSE
sweep : 0.2 [Hz] : 0.0 [s]
curepolds : 0 [%] : 80 [%] : 100 [%]
zerofill : 1
ift : 1 : TRUE : TRUE
machinephase
ppm
  
```

```

Filename = 20170222ADPh345 (CGH130)
Author = delta
Experiment = single_pulse.ex2
Sample_id = #741529
Solvent = CHLOROFORM-D
Creation_time = 22-FEB-2017 19:02:26
Revision_time = 7-JUL-2017 20:11:20
Current_time = 7-JUL-2017 20:11:35
  
```

```

Comment = single_pulse
Data_format = 1D_COMPLEX
Dim_size = 13107
Dim_title = 1H
Dim_units = [ppm]
Dimensions = X
Site = ECA500
Spectrometer = JNM-ECA500
  
```

```

Field_strength = 11.7473579 [G] (500 [MH]
X_acq_duration = 1.74587904 [s]
X_domain = 1H
X_freq = 500.15991521 [MHz]
X_offset = 5.0 [ppm]
X_points = 16384
X_prescans = 1
X_resolution = 0.57277737 [Hz]
X_sweep = 9.38438438 [kHz]
Irr_domain = 1H
Irr_freq = 500.15991521 [MHz]
Irr_offset = 5.0 [ppm]
Irr_domain = 1H
Irr_freq = 500.15991521 [MHz]
Irr_offset = 5.0 [ppm]
Clipped = FALSE
Mod_return = 1
Scans = 8
Total_scans = 8
  
```

```

X_90_width = 6.24 [us]
X_acq_time = 1.74587904 [s]
X_angle = 45 [deg]
X_atn = 3.4 [dB]
X_pulse = 3.12 [us]
Irr_mode = Off
Irr_mode = Off
Dante_presat = FALSE
Initial_wait = 1 [s]
Recvr_gain = 36
Relaxation_delay = 5 [s]
Repetition_time = 6.74587904 [s]
Temp_get = 21.2 [dC]
  
```

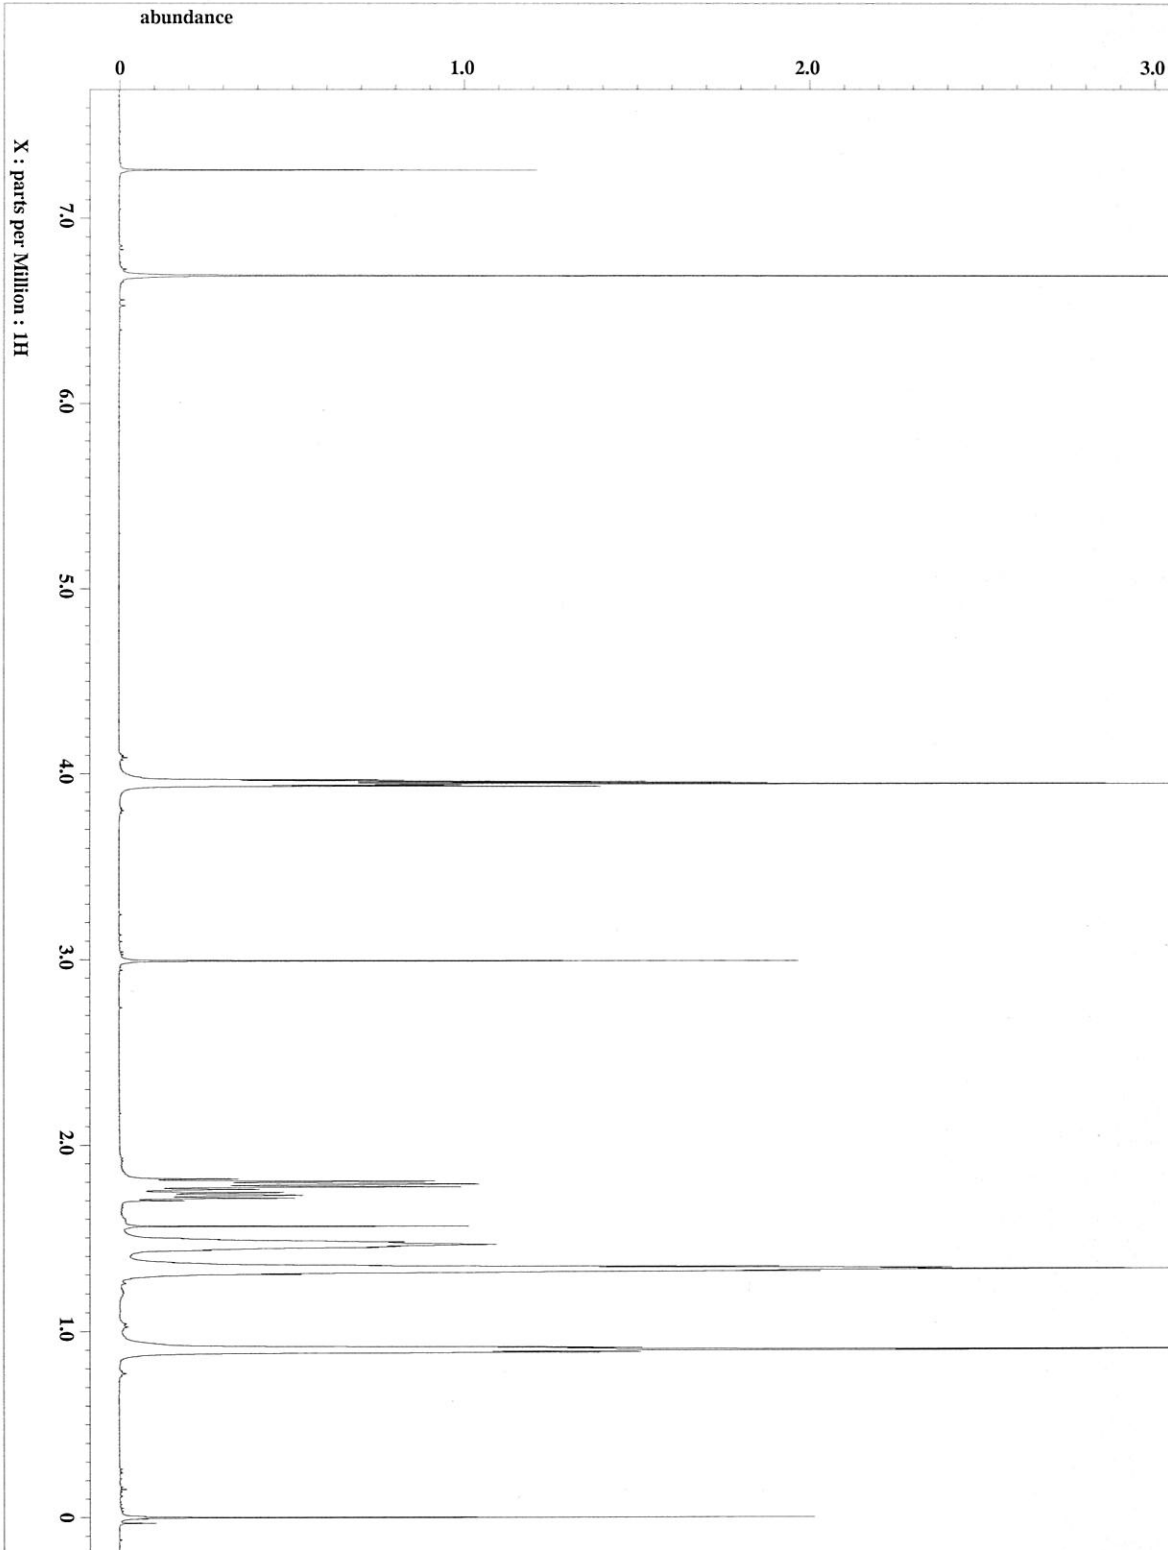

Figure S18. <sup>1</sup>H NMR of 15.



Comment 1

Comment 2

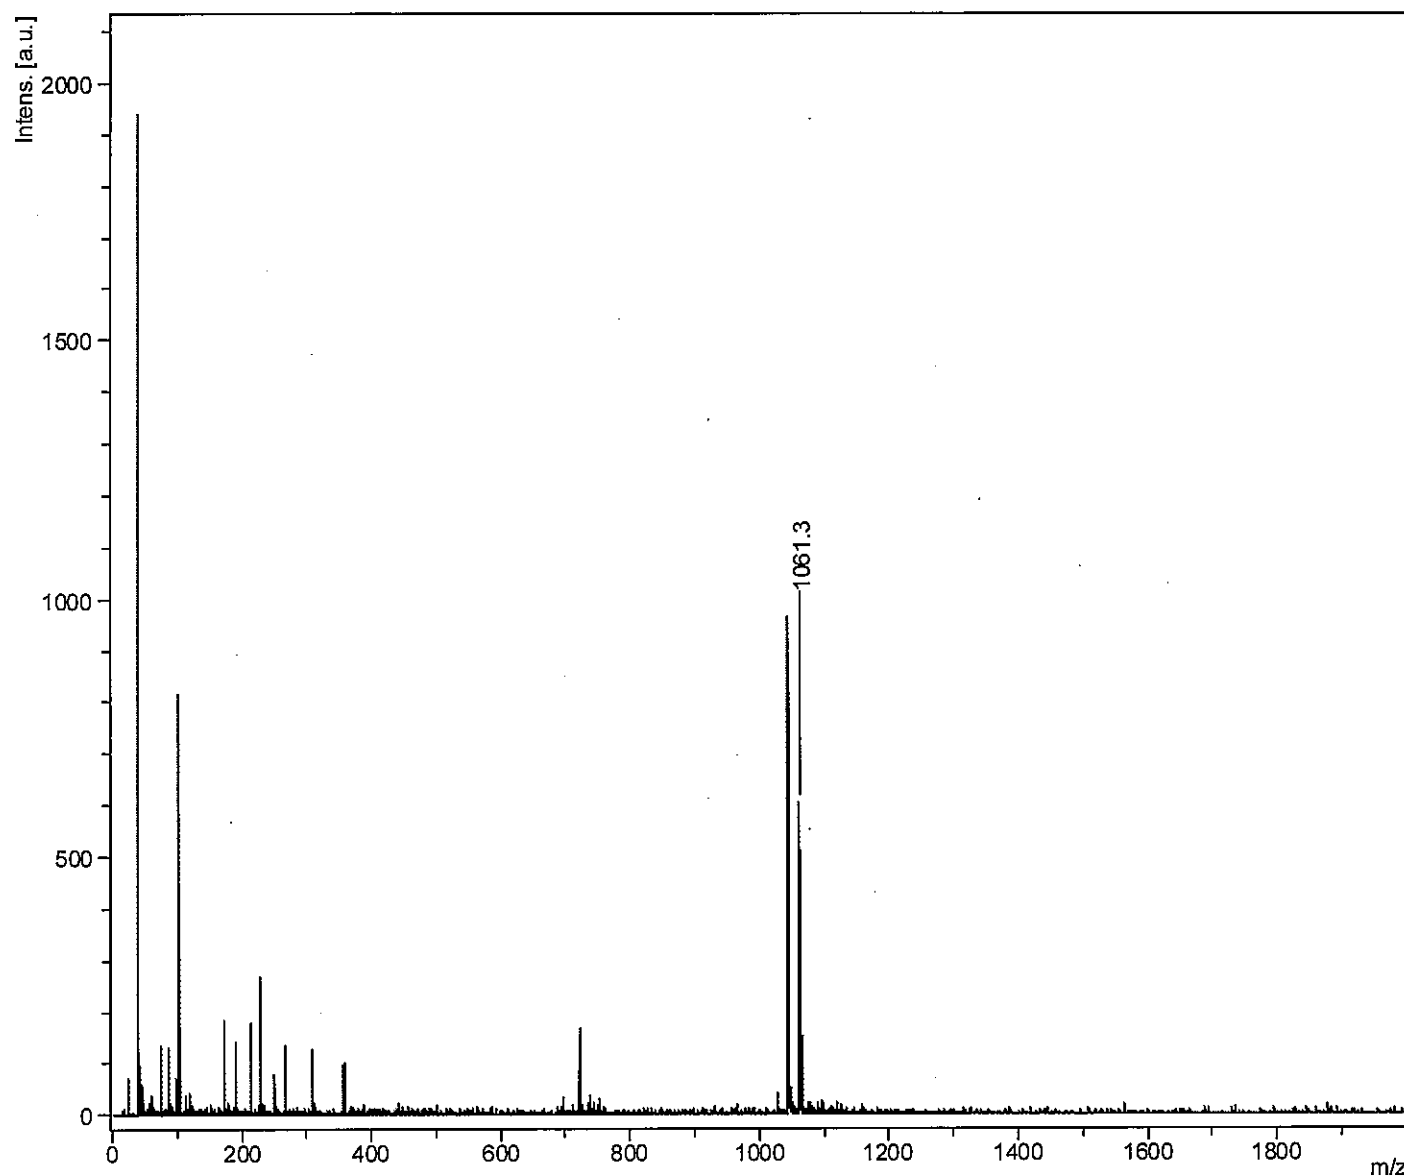

**Acquisition Parameter**

Date of acquisition 2016-10-06T13:29:11.171+09:00  
Acquisition method name D:\Methods\flexControl\Methods\RP\_0-2000\_Da.par  
Acquisition operation mode Reflector  
Voltage polarity POS  
Number of shots 500  
Name of spectrum used for calibration  
Calibration reference list used

**Instrument Info**

User DoshisyaUniv  
Instrument FLEX-PC  
Instrument type autoflex

Comment 1

Comment 2

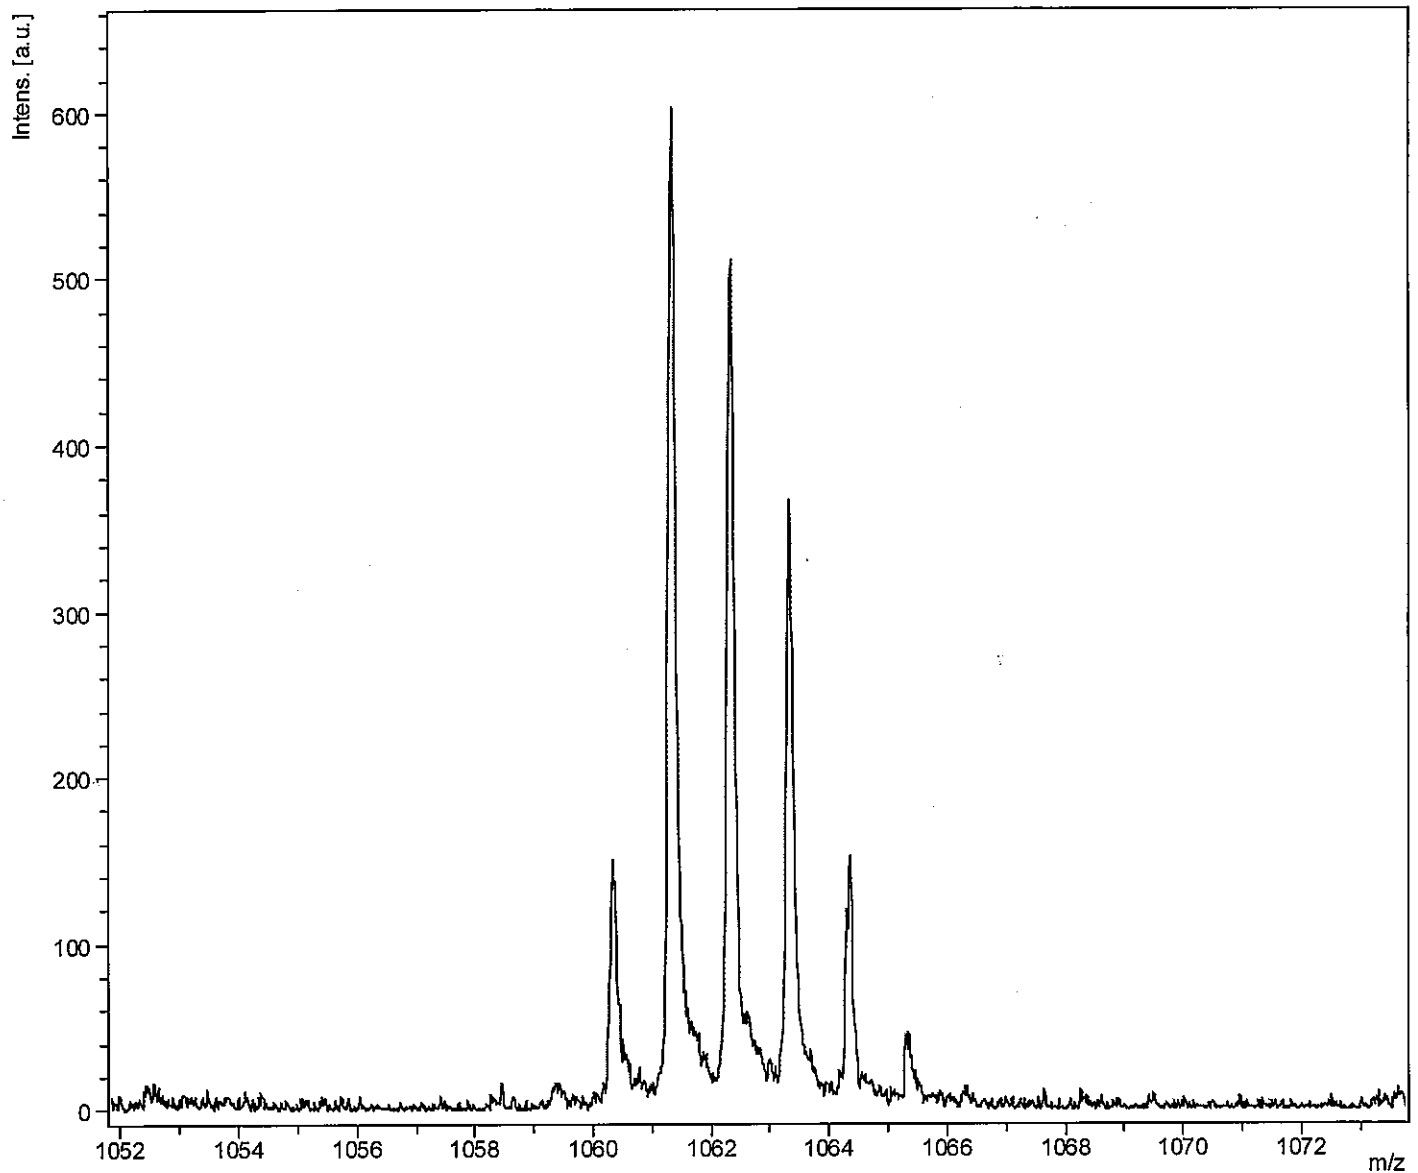

**Acquisition Parameter**

Date of acquisition 2016-10-06T13:29:11.171+09:00  
Acquisition method name D:\Methods\flexControlMethods\RP\_0-2000\_Da.par  
Acquisition operation mode Reflector  
Voltage polarity POS  
Number of shots 500  
Name of spectrum used for calibration  
Calibration reference list used

**Instrument Info**

User DoshisyaUniv  
Instrument FLEX-PC  
Instrument type autoflex

Comment 1

Comment 2

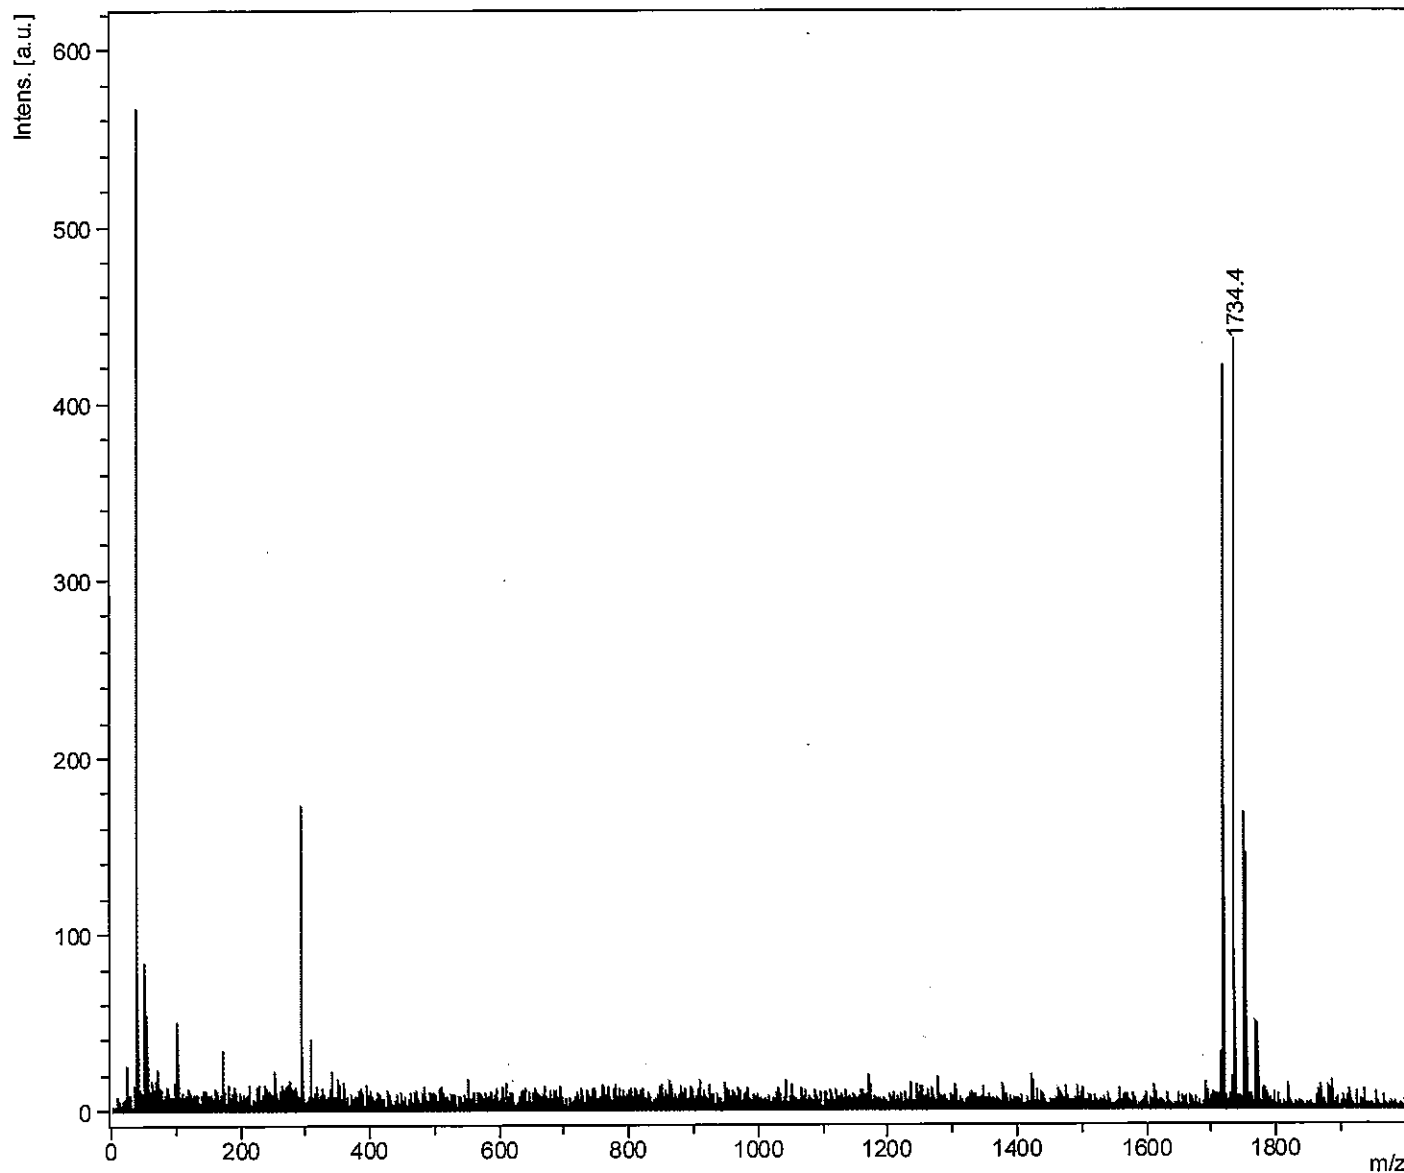

Comment 1

Comment 2

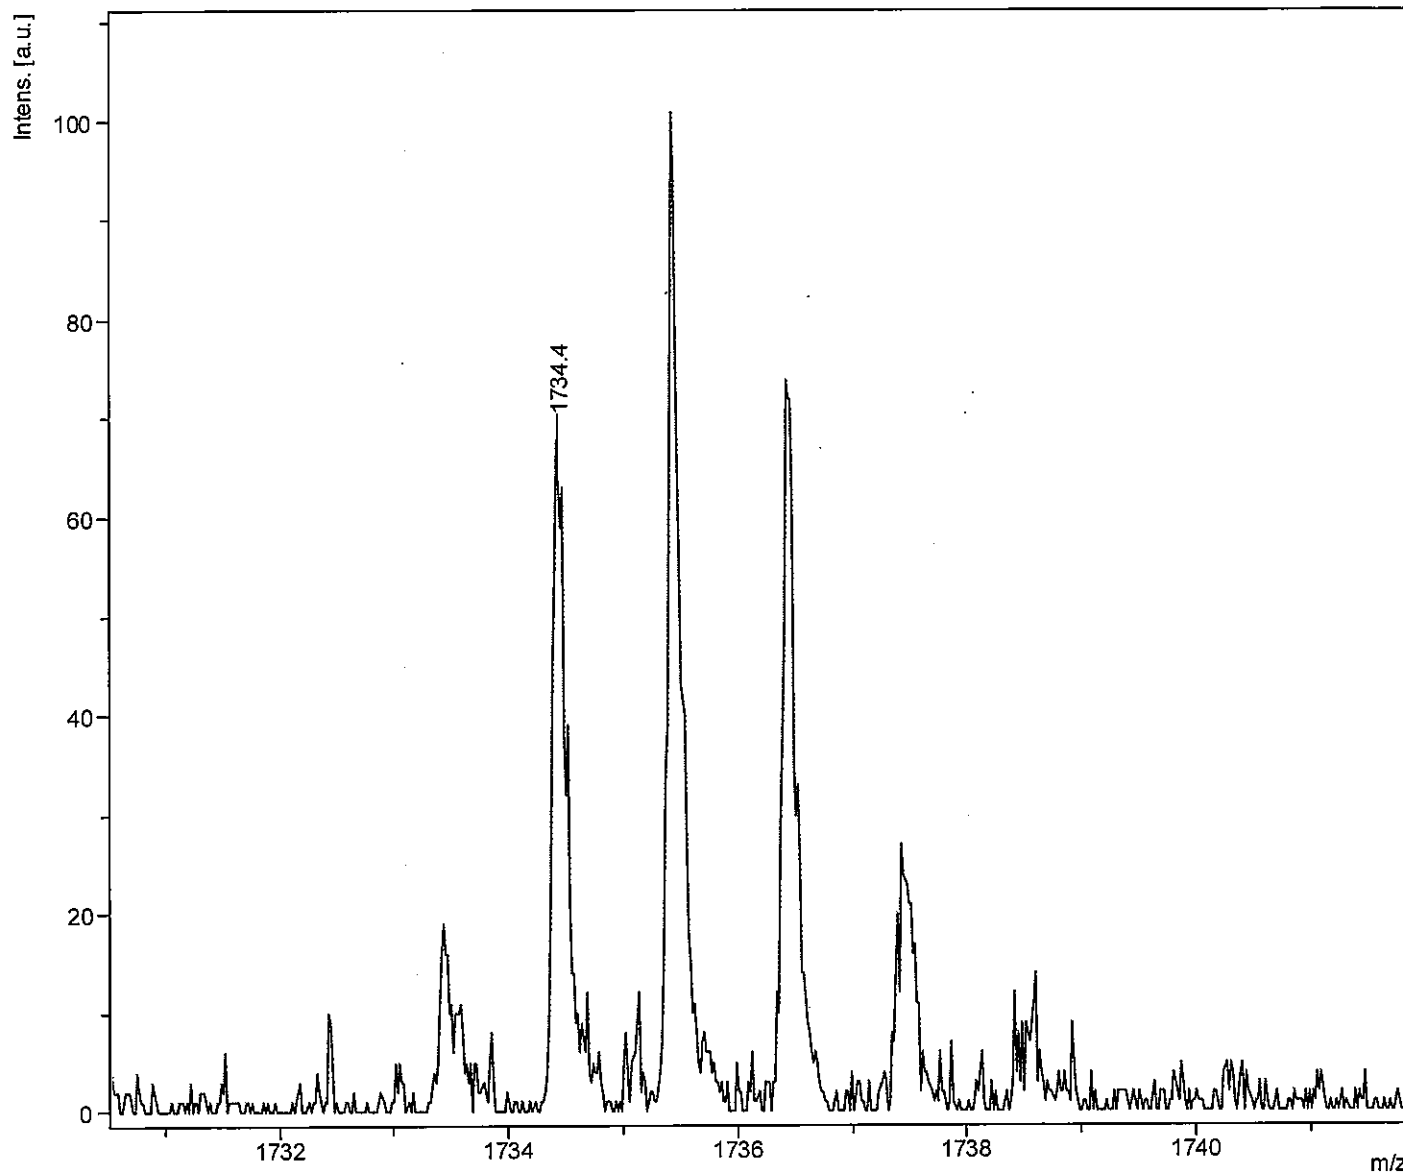

**Acquisition Parameter**

Date of acquisition 2016-10-06T13:31:10.171+09:00  
Acquisition method name D:\Methods\flexControlMethods\RP\_0-2000\_Da.par  
Acquisition operation mode Reflector  
Voltage polarity POS  
Number of shots 500  
Name of spectrum used for calibration  
Calibration reference list used

**Instrument Info**

User DoshisyaUniv  
Instrument FLEX-PC  
Instrument type autoflex

Figure S20. MALDI-TOF mass spectrum of 1b (Molecular ion peaks).

Comment 1

Comment 2

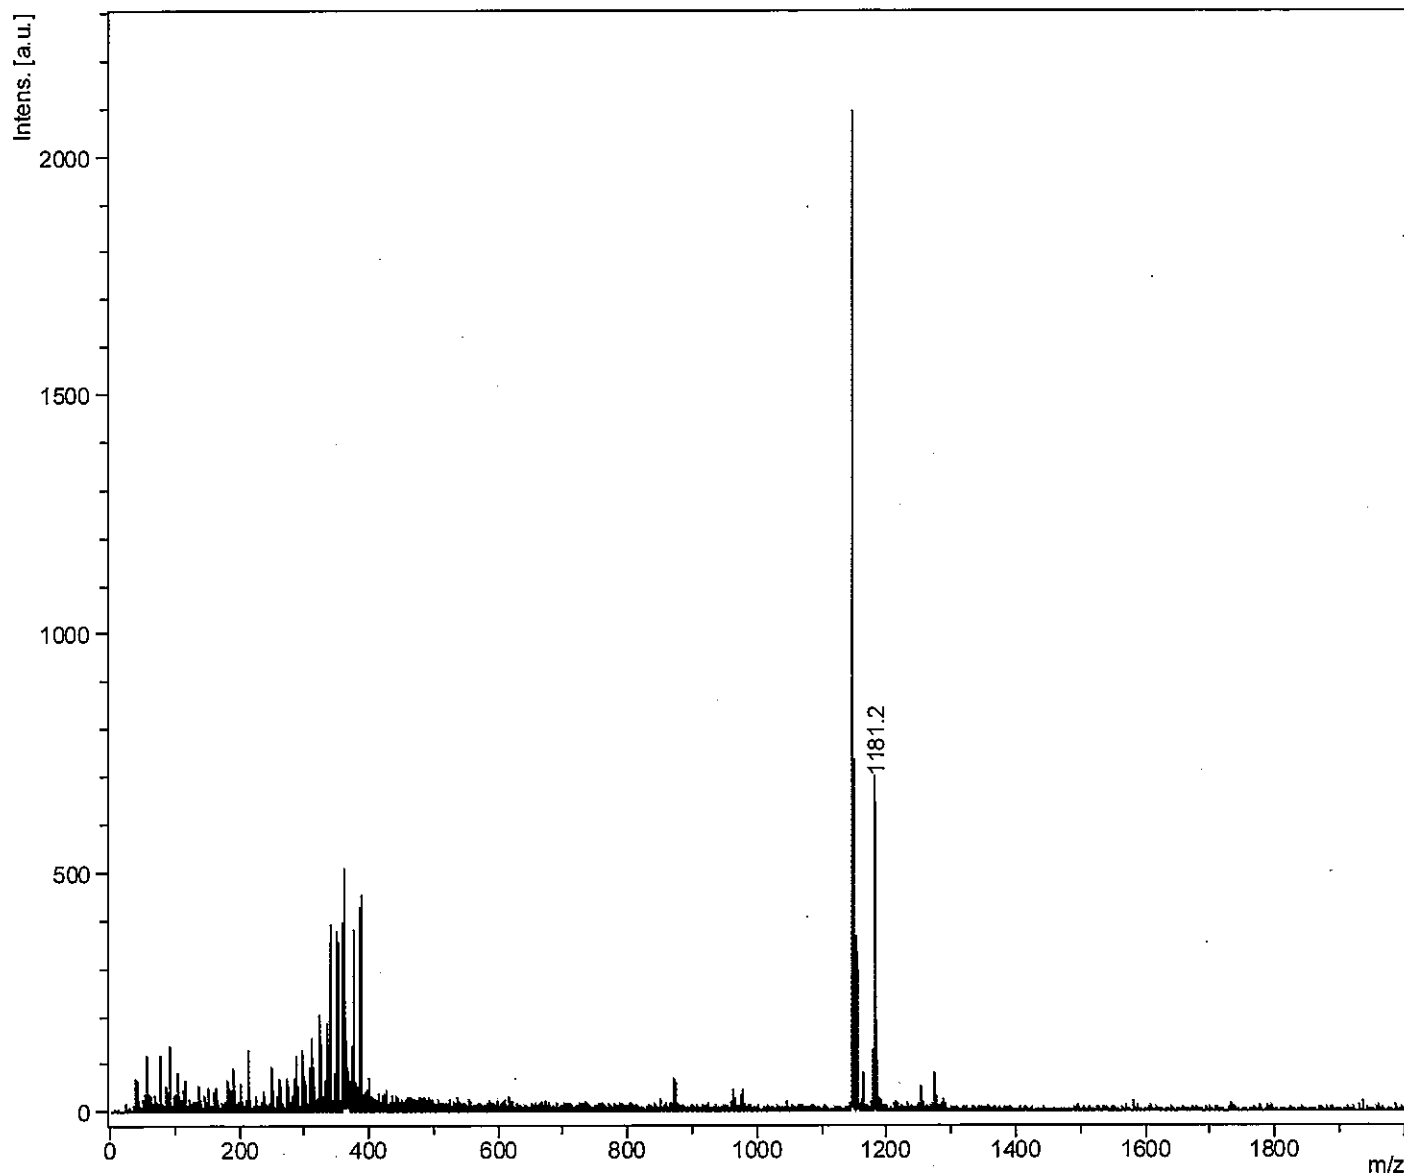

**Acquisition Parameter**

Date of acquisition 2016-10-06T13:32:48.765+09:00  
Acquisition method name D:\Methods\flexControlMethods\RP\_0-2000\_Da.par  
Acquisition operation mode Reflector  
Voltage polarity POS  
Number of shots 500  
Name of spectrum used for calibration  
Calibration reference list used

**Instrument Info**

User DoshisyaUniv  
Instrument FLEX-PC  
Instrument type autoflex

Comment 1

Comment 2

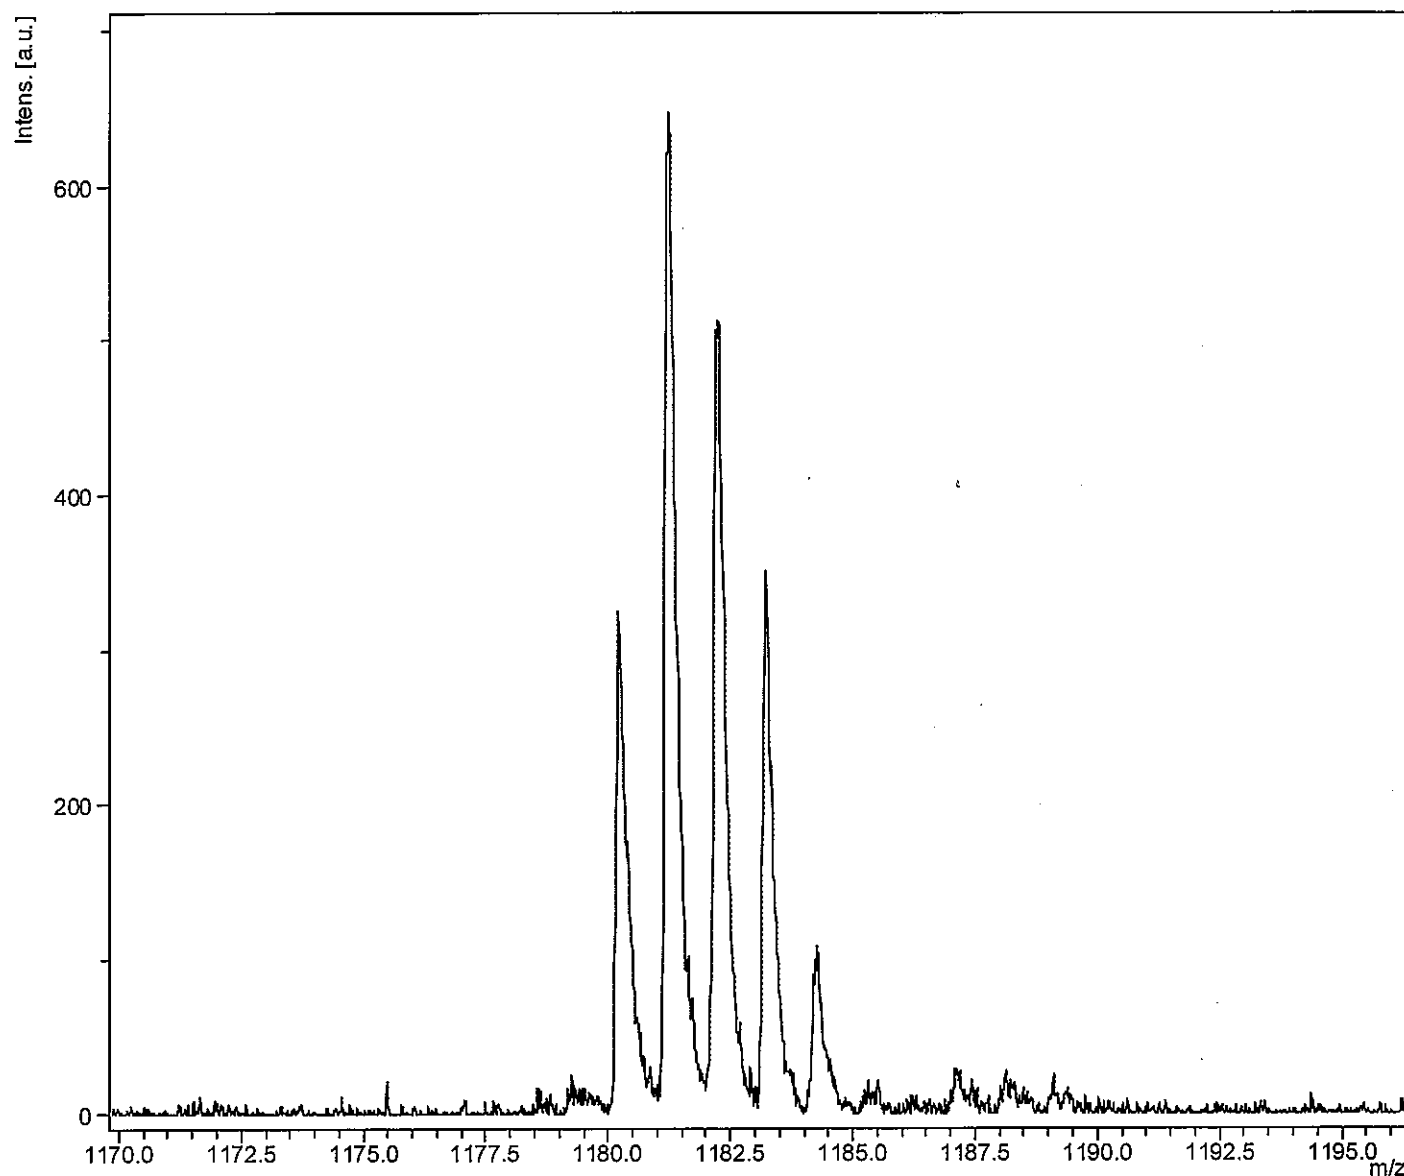

**Acquisition Parameter**

Date of acquisition 2016-10-06T13:32:48.765+09:00  
Acquisition method name D:\Methods\flexControlMethods\RP\_0-2000\_Da.par  
Acquisition operation mode Reflector  
Voltage polarity POS  
Number of shots 500  
Name of spectrum used for calibration  
Calibration reference list used

**Instrument Info**

User DoshisyaUniv  
Instrument FLEX-PC  
Instrument type autoflex

Figure S21. MALDI-TOF mass spectrum of **1c** (Molecular ion peaks).

Comment 1

Comment 2

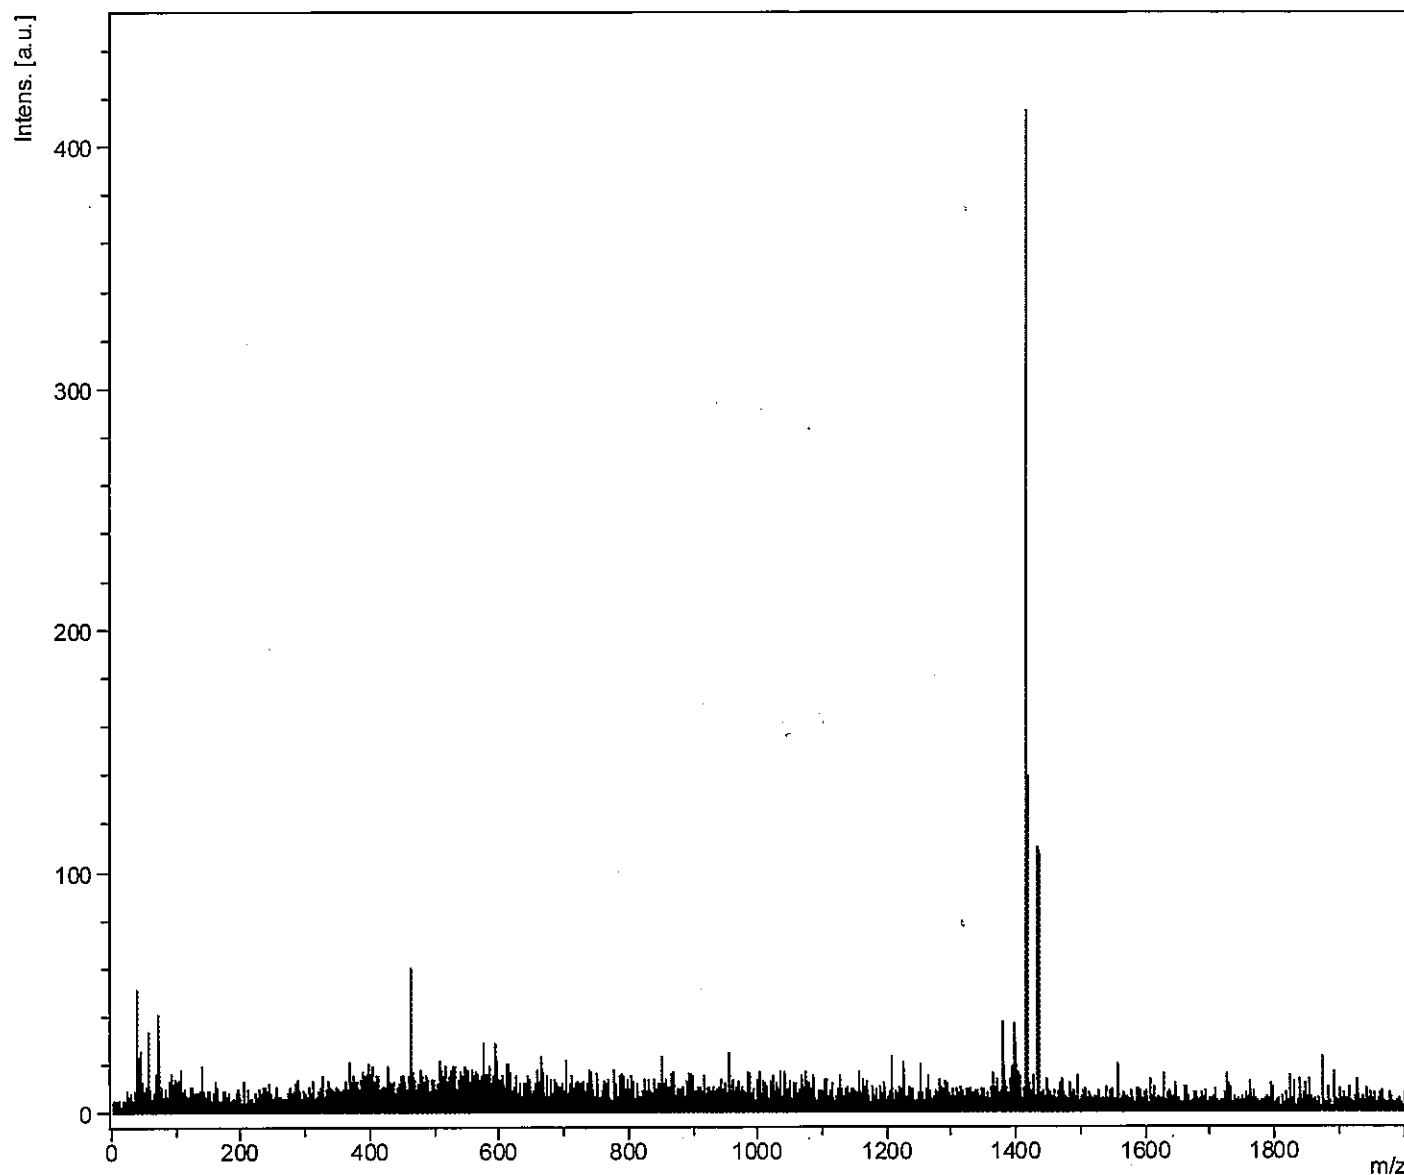

**Acquisition Parameter**

Date of acquisition 2017-01-16T10:50:16.781+09:00  
Acquisition method name D:\Methods\flexControlMethods\RP\_0-2000\_Da.par  
Acquisition operation mode Reflector  
Voltage polarity POS  
Number of shots 500  
Name of spectrum used for calibration  
Calibration reference list used

**Instrument Info**

User DoshisyaUniv  
Instrument FLEX-PC  
Instrument type autoflex

Comment 1

Comment 2

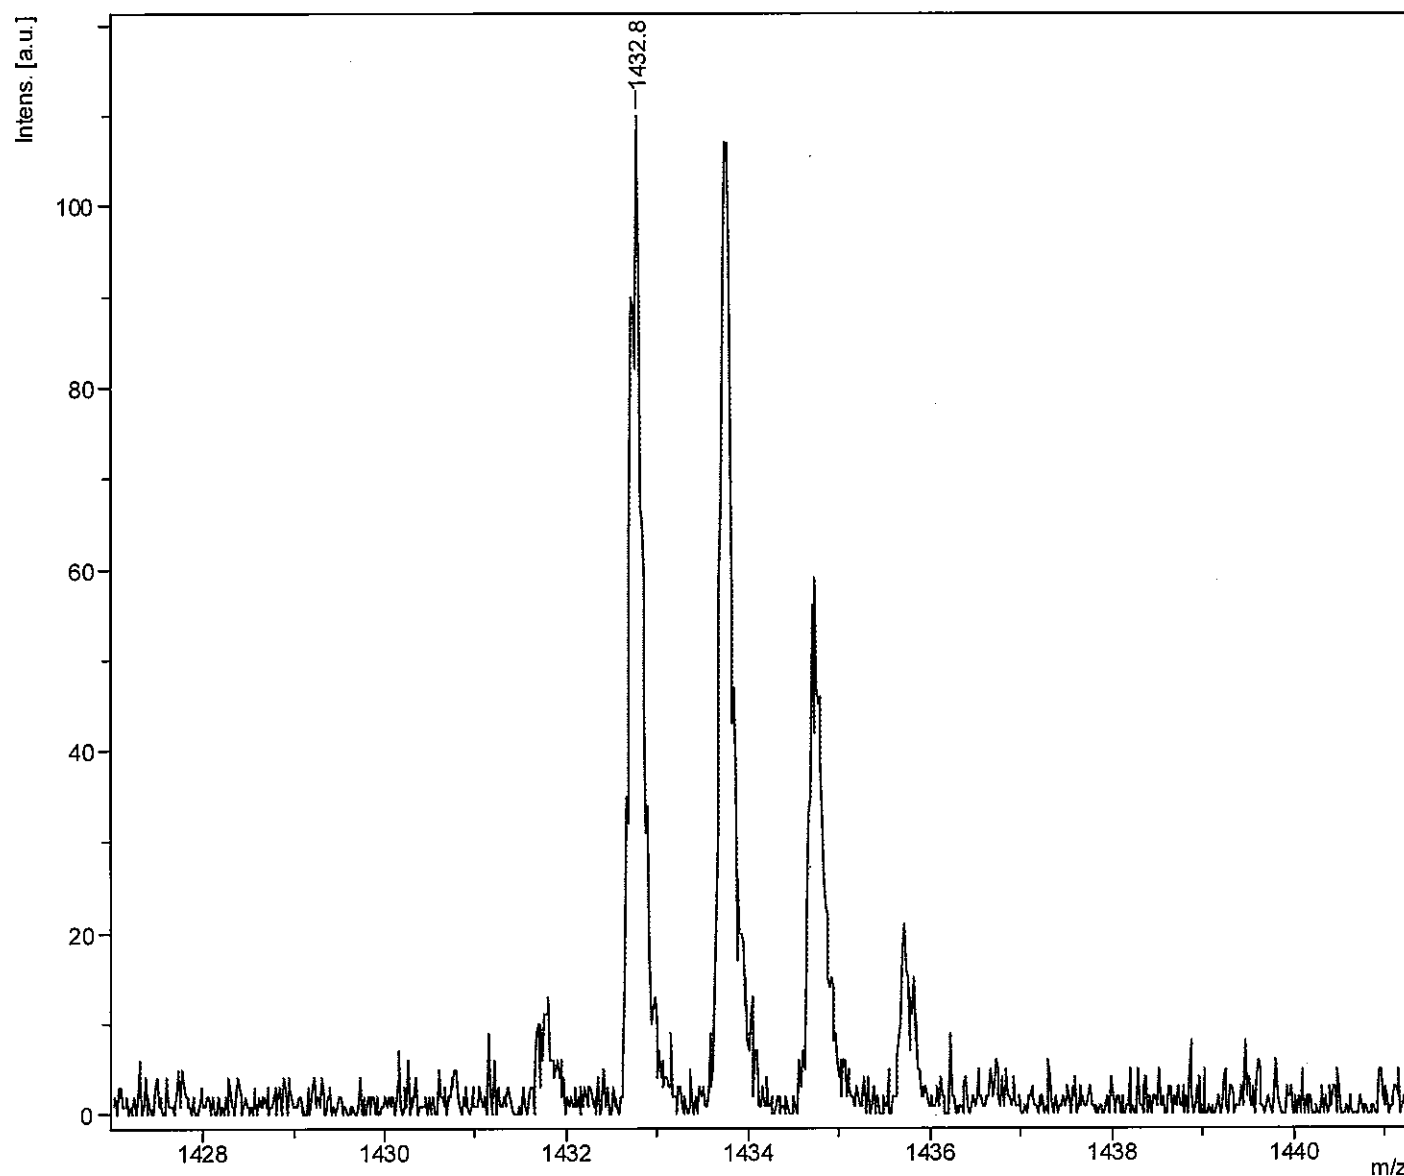

#### Acquisition Parameter

Date of acquisition 2017-01-16T10:50:16.781+09:00  
Acquisition method name D:\Methods\flexControl\Methods\RP\_0-2000\_Da.par  
Acquisition operation mode Reflector  
Voltage polarity POS  
Number of shots 500  
Name of spectrum used for calibration  
Calibration reference list used

#### Instrument Info

User DoshisyaUniv  
Instrument FLEX-PC  
Instrument type autoflex



Comment 1

Comment 2

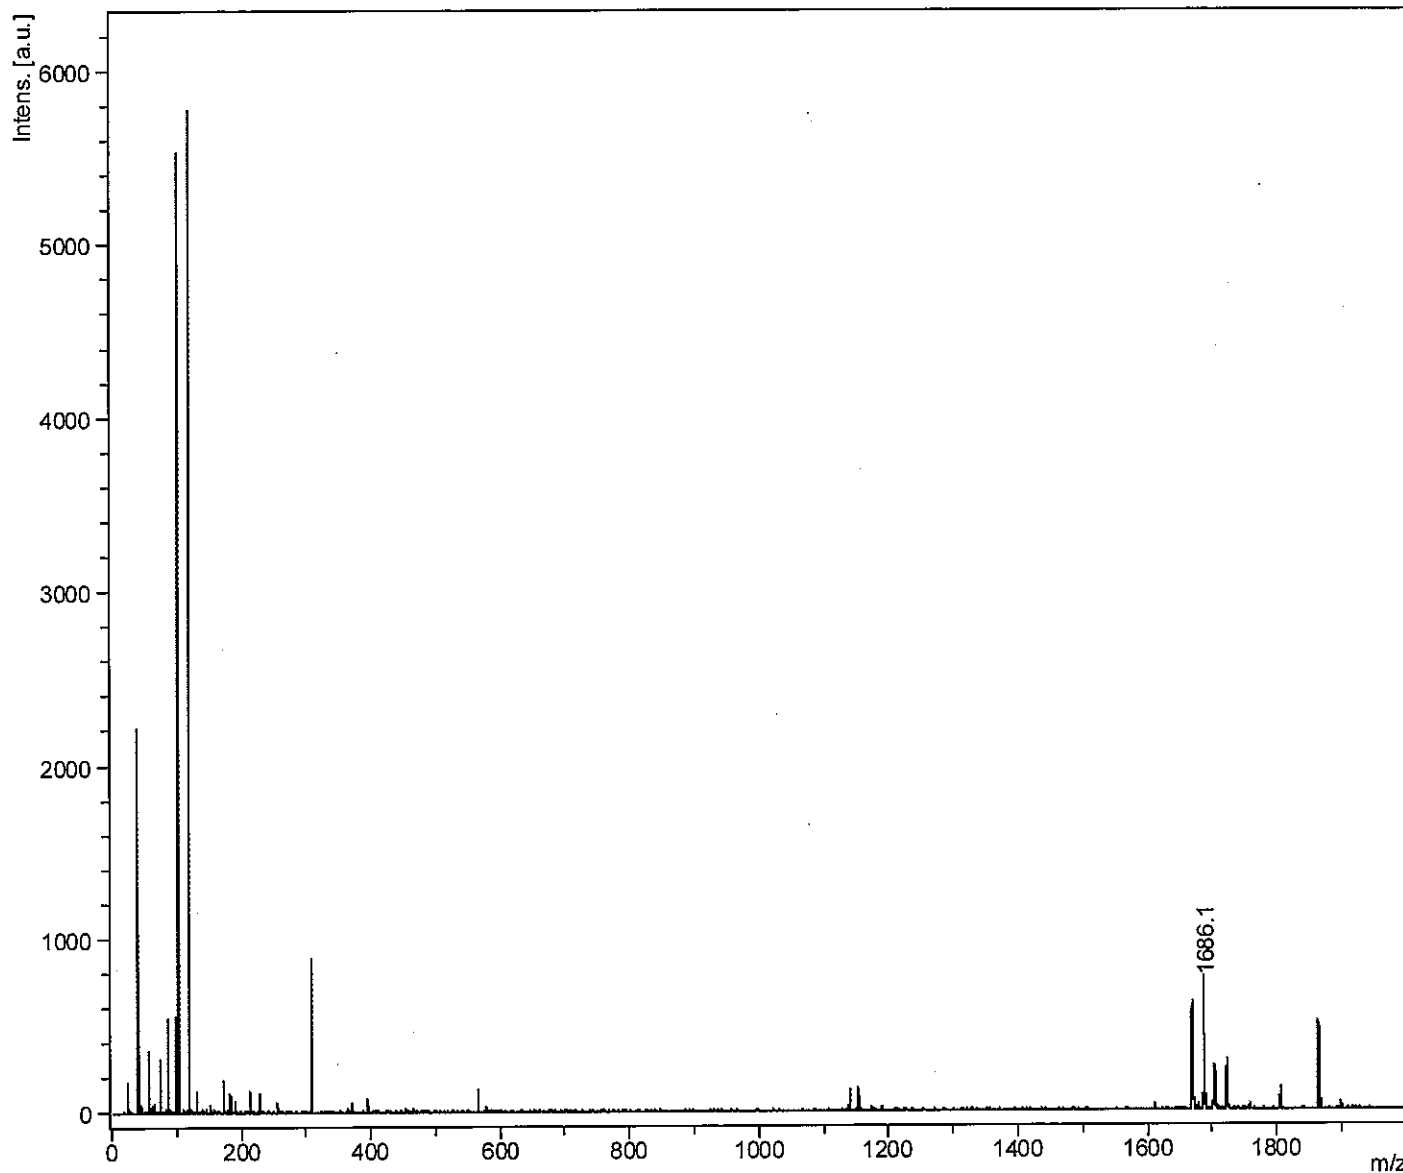

**Acquisition Parameter**

Date of acquisition 2016-10-06T13:34:03.875+09:00  
Acquisition method name D:\Methods\flexControlMethods\RP\_0-2000\_Da.par  
Acquisition operation mode Reflector  
Voltage polarity POS  
Number of shots 500  
Name of spectrum used for calibration  
Calibration reference list used

**Instrument Info**

User DoshisyaUniv  
Instrument FLEX-PC  
Instrument type autoflex

Figure S23. MALDI-TOF mass spectrum of **1e**.

Comment 1

Comment 2

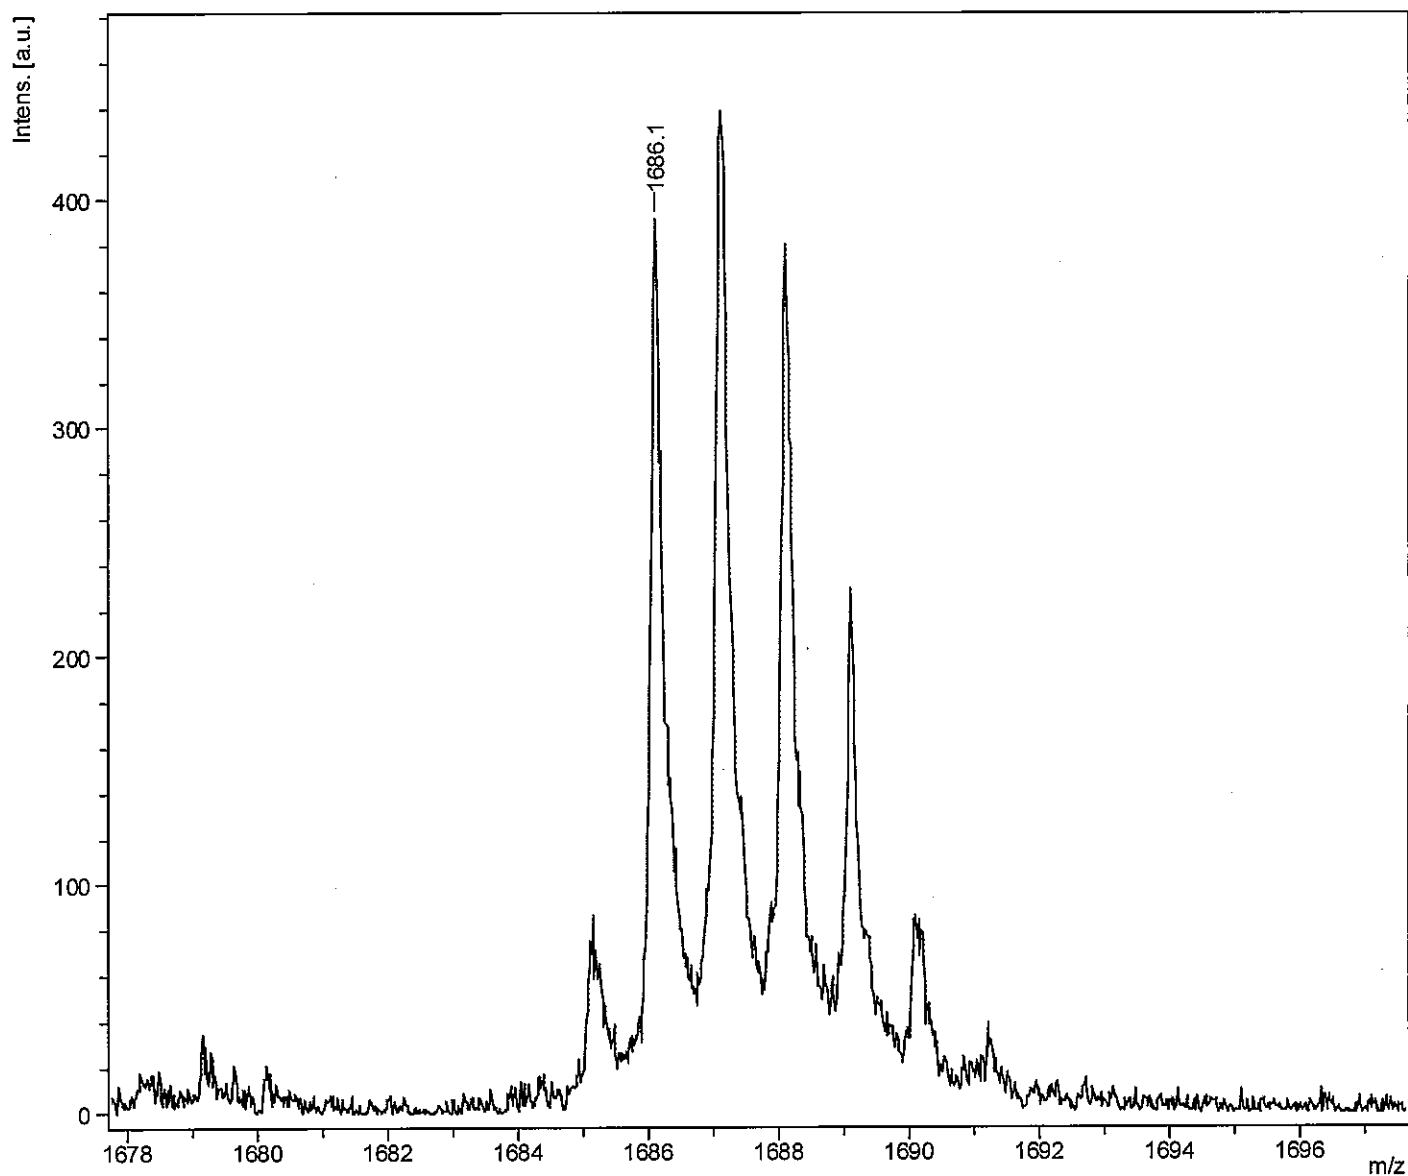

**Acquisition Parameter**

Date of acquisition 2016-10-06T13:34:03.875+09:00  
Acquisition method name D:\Methods\flexControlMethods\RP\_0-2000\_Da.par  
Acquisition operation mode Reflector  
Voltage polarity POS  
Number of shots 500  
Name of spectrum used for calibration  
Calibration reference list used

**Instrument Info**

User DoshisyaUniv  
Instrument FLEX-PC  
Instrument type autoflex

Comment 1

Comment 2

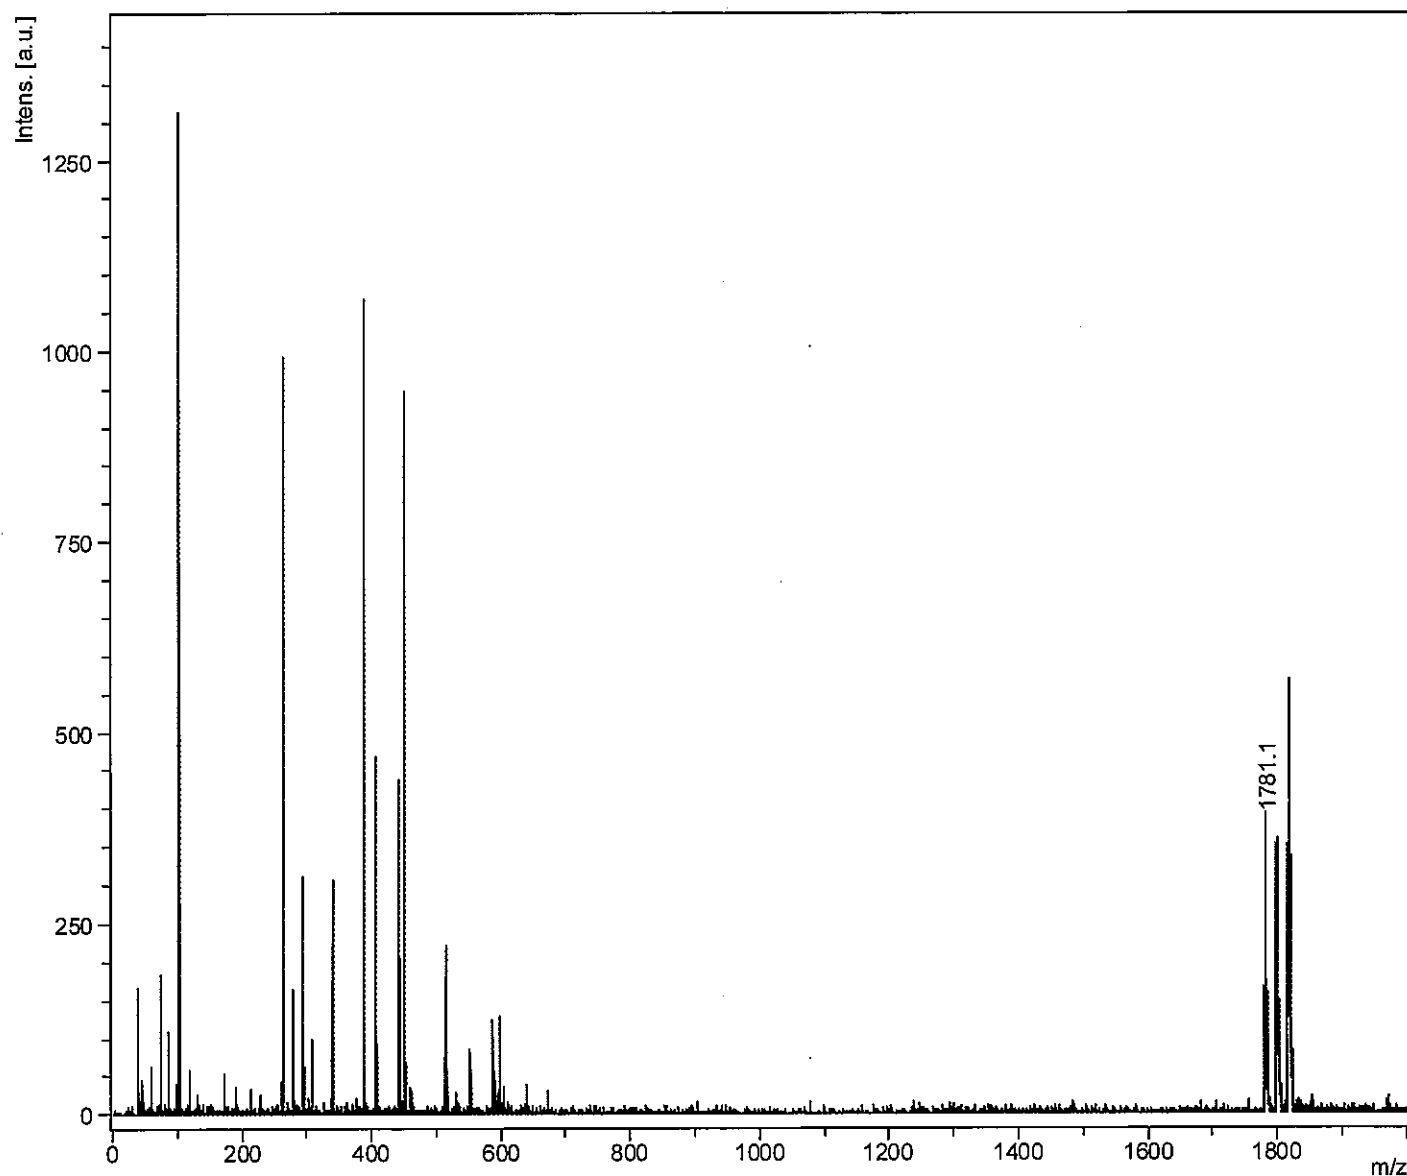

**Acquisition Parameter**

Date of acquisition 2016-10-06T13:37:43.531+09:00  
Acquisition method name D:\Methods\flexControlMethods\RP\_0-2000\_Da.par  
Acquisition operation mode Reflector  
Voltage polarity POS  
Number of shots 500  
Name of spectrum used for calibration  
Calibration reference list used

**Instrument Info**

User DoshisyaUniv  
Instrument FLEX-PC  
Instrument type autoflex

Comment 1

Comment 2

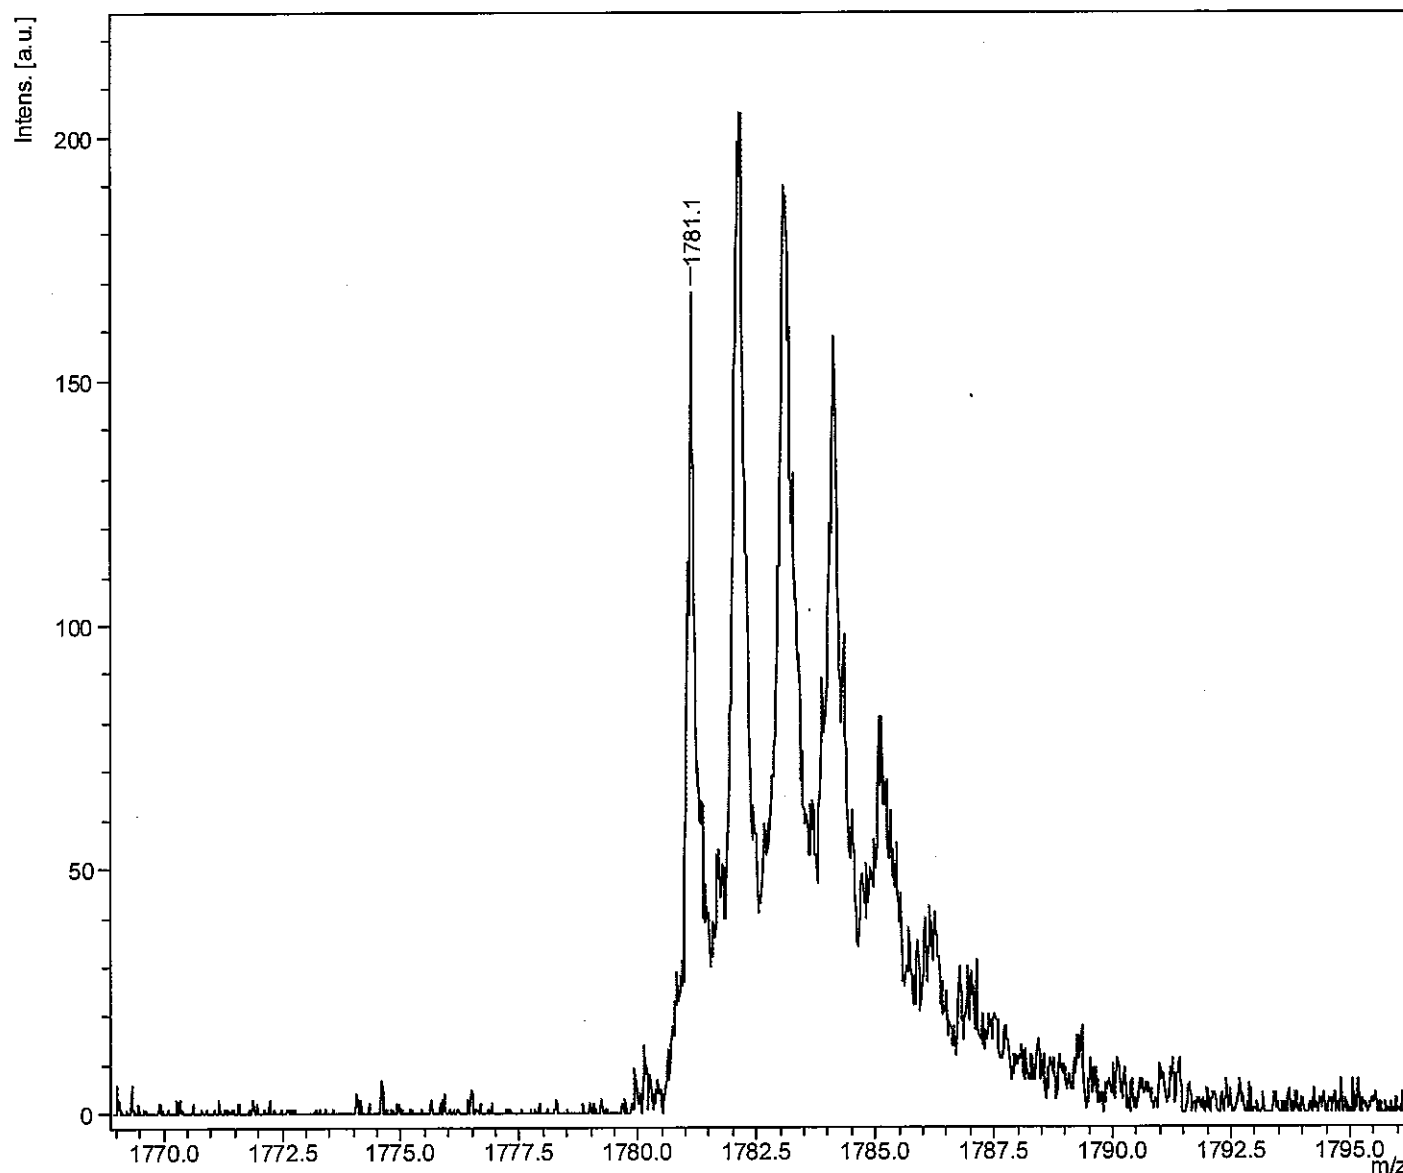

#### Acquisition Parameter

Date of acquisition 2016-10-06T13:37:43.531+09:00  
Acquisition method name D:\Methods\flexControlMethods\RP\_0-2000\_Da.par  
Acquisition operation mode Reflector  
Voltage polarity POS  
Number of shots 500  
Name of spectrum used for calibration  
Calibration reference list used

#### Instrument Info

User DoshisyaUniv  
Instrument FLEX-PC  
Instrument type autoflex

Comment 1

Comment 2

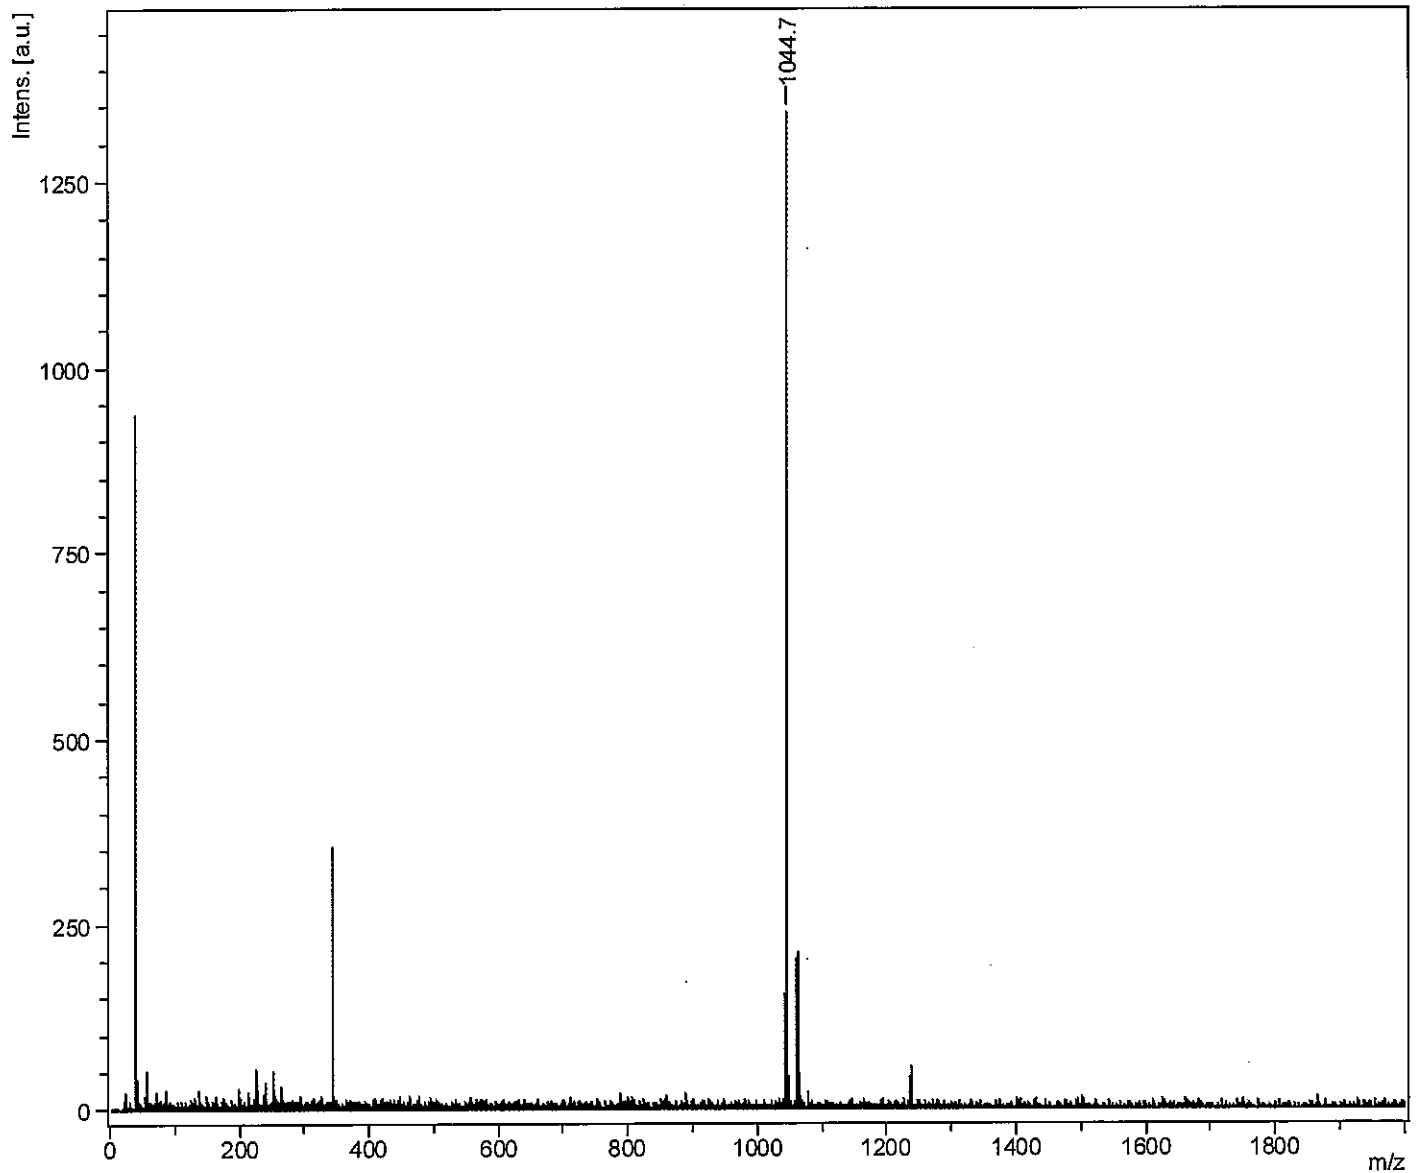

**Acquisition Parameter**

Date of acquisition 2017-01-18T19:38:51.687+09:00  
Acquisition method name D:\Methods\flexControlMethods\RP\_0-2000\_Da.par  
Acquisition operation mode Reflector  
Voltage polarity POS  
Number of shots 500  
Name of spectrum used for calibration  
Calibration reference list used

**Instrument Info**

User DoshisyaUniv  
Instrument FLEX-PC  
Instrument type autoflex

Comment 1

Comment 2

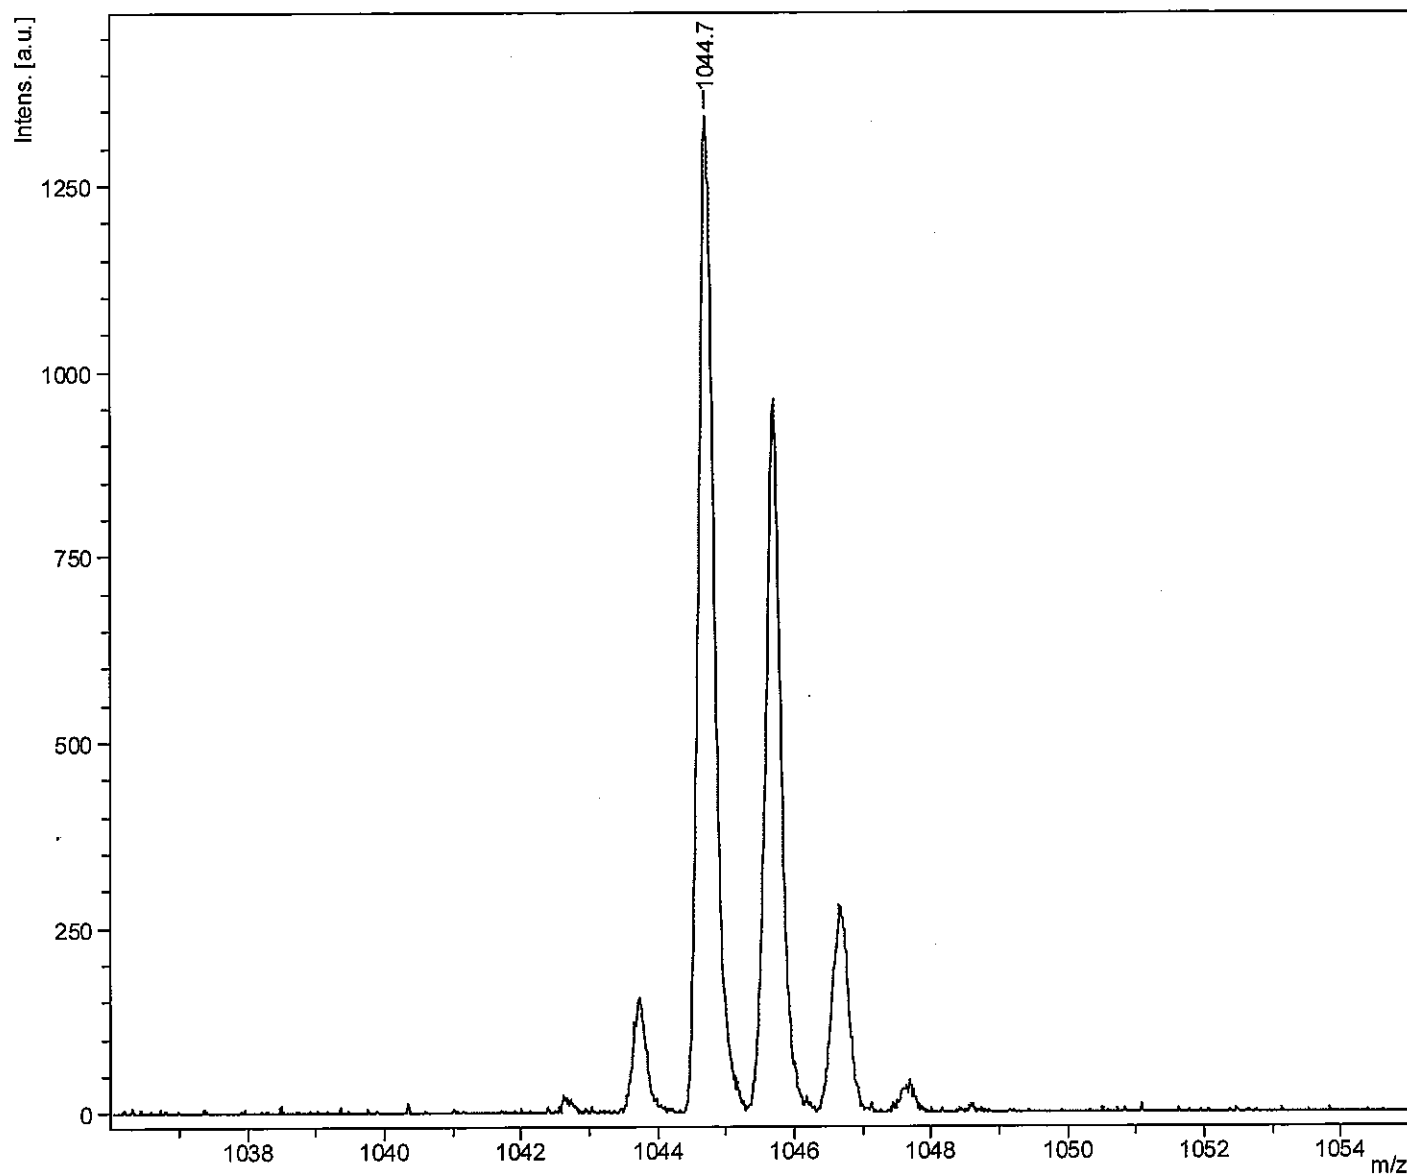

**Acquisition Parameter**

Date of acquisition 2017-01-18T19:38:51.687+09:00  
Acquisition method name D:\Methods\flexControlMethods\RP\_0-2000\_Da.par  
Acquisition operation mode Reflector  
Voltage polarity POS  
Number of shots 500  
Name of spectrum used for calibration  
Calibration reference list used

**Instrument Info**

User DoshisyaUniv  
Instrument FLEX-PC  
Instrument type autoflex

Comment 1

Comment 2

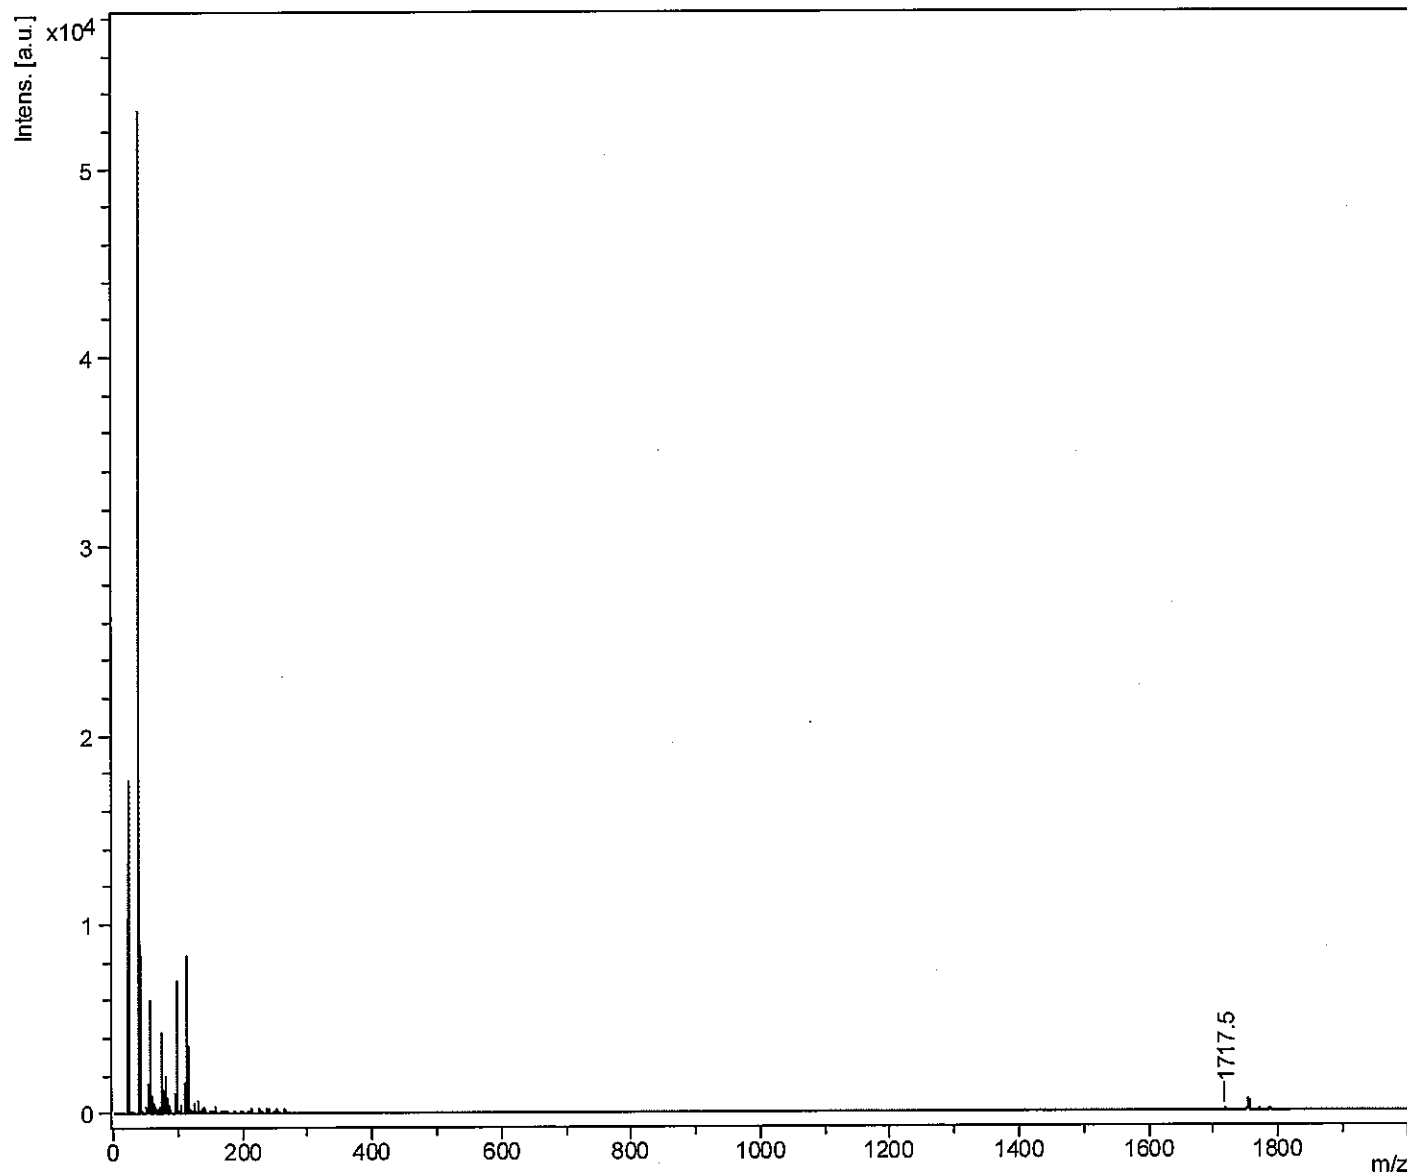

**Acquisition Parameter**

Date of acquisition 2017-06-05T13:10:35.921+09:00  
Acquisition method name D:\Methods\flexControl\Methods\RP\_0-2000\_Da.par  
Acquisition operation mode Reflector  
Voltage polarity POS  
Number of shots 500  
Name of spectrum used for calibration  
Calibration reference list used

**Instrument Info**

User DoshisyaUniv  
Instrument FLEX-PC  
Instrument type autoflex

Figure S26. MALDI-TOF mass spectrum of **2b**.

Comment 1

Comment 2

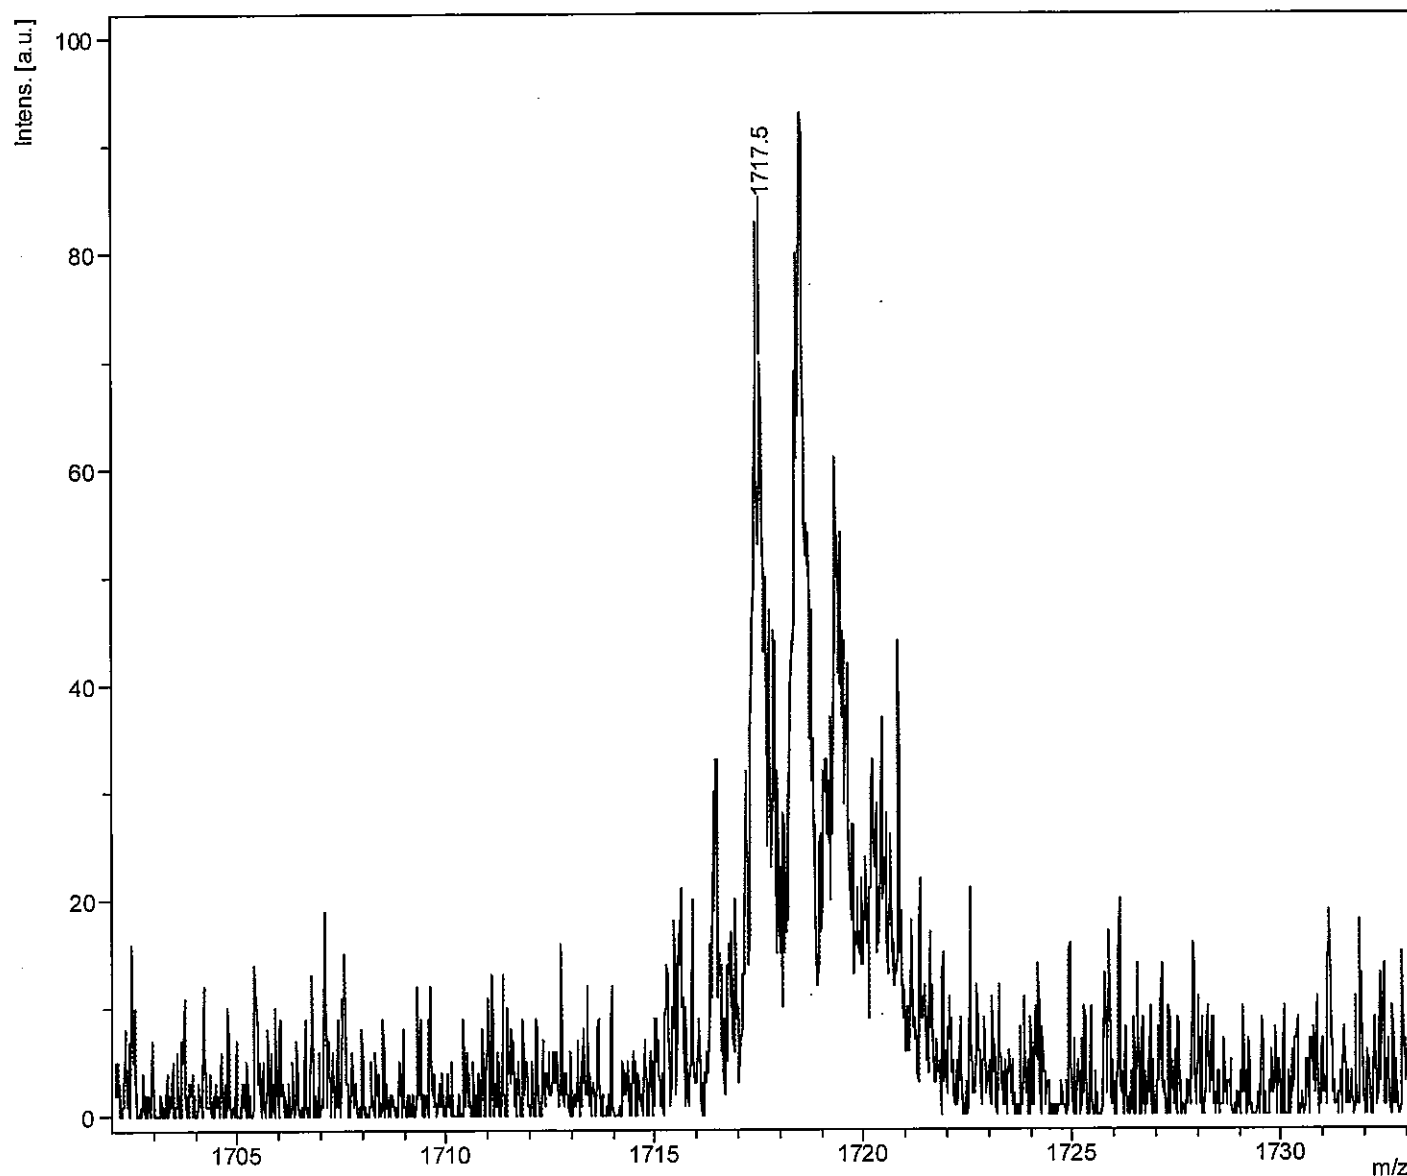

**Acquisition Parameter**

Date of acquisition 2017-06-05T13:10:35.921+09:00  
Acquisition method name D:\Methods\flexControlMethods\RP\_0-2000\_Da.par  
Acquisition operation mode Reflector  
Voltage polarity POS  
Number of shots 500  
Name of spectrum used for calibration  
Calibration reference list used

**Instrument Info**

User DoshisyaUniv  
Instrument FLEX-PC  
Instrument type autoflex

Figure S26. MALDI-TOF mass spectrum of **2b** (Molecular ion peaks).



Comment 1

Comment 2

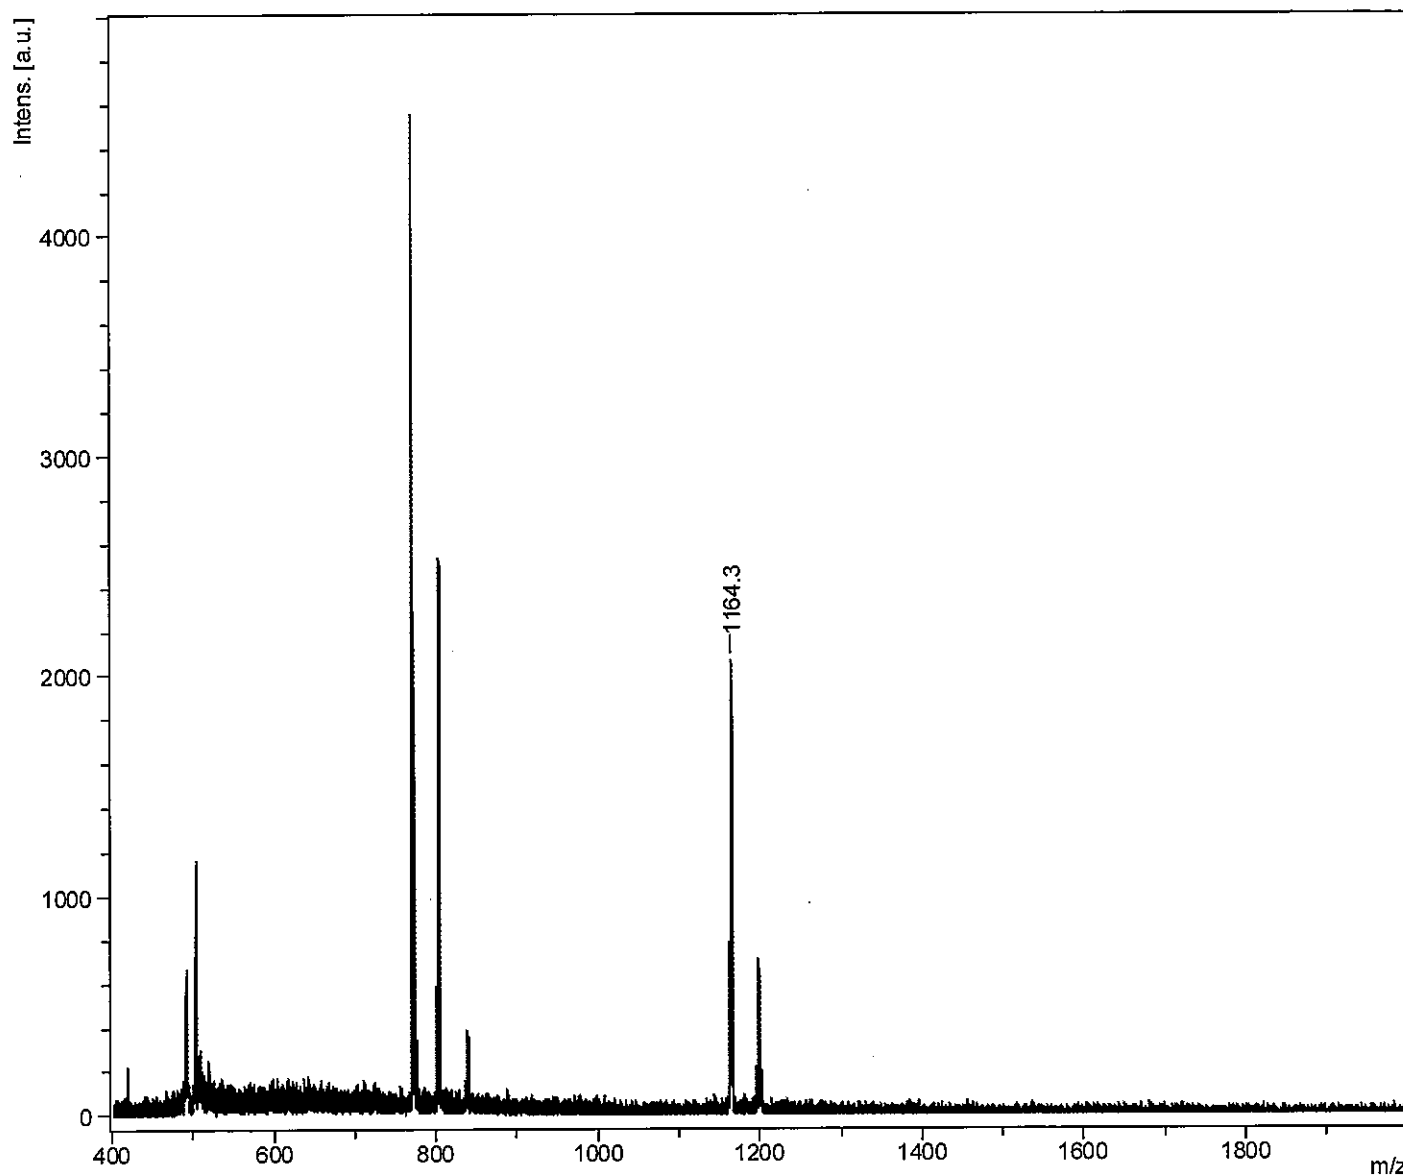

**Acquisition Parameter**

Date of acquisition 2017-06-05T15:56:11.281+09:00  
Acquisition method name D:\Methods\flexControlMethods\RP\_700-4500\_Da.par  
Acquisition operation mode Reflector  
Voltage polarity POS  
Number of shots 500  
Name of spectrum used for calibration  
Calibration reference list used

**Instrument Info**

User DoshisyaUniv  
Instrument FLEX-PC  
Instrument type autoflex

Comment 1

Comment 2

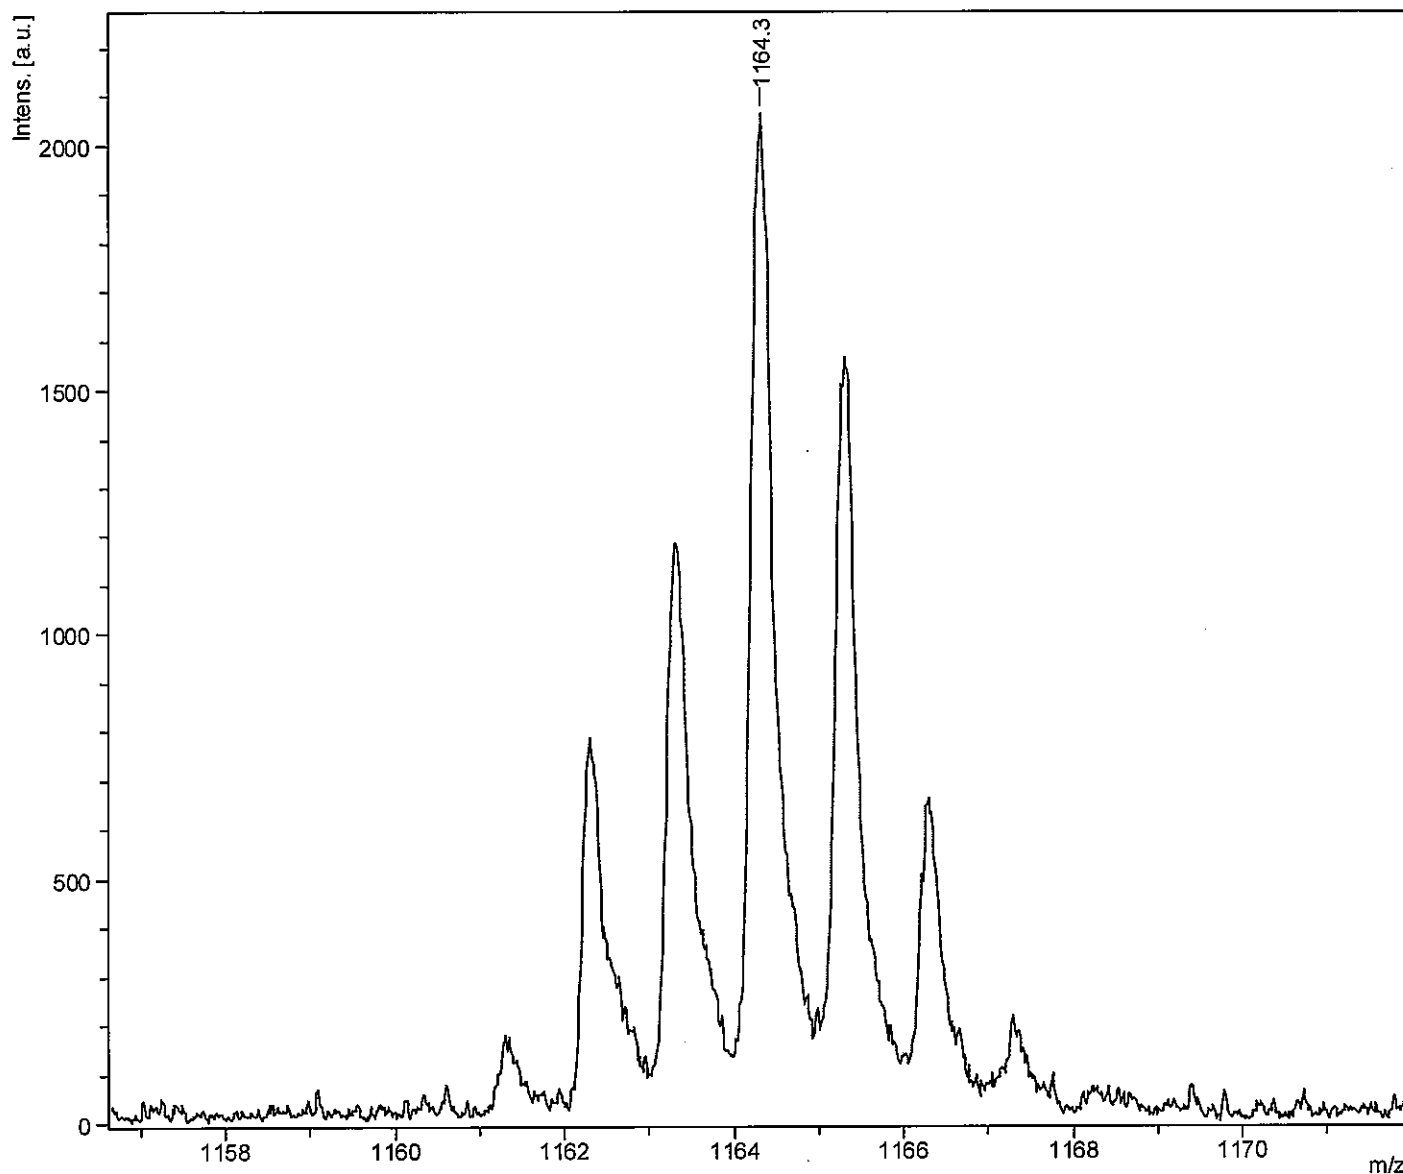

**Acquisition Parameter**

Date of acquisition 2017-06-05T15:56:11.281+09:00  
Acquisition method name D:\Methods\flexControlMethods\RP\_700-4500\_Da.par  
Acquisition operation mode Reflector  
Voltage polarity POS  
Number of shots 500  
Name of spectrum used for calibration  
Calibration reference list used

**Instrument Info**

User DoshisyaUniv  
Instrument FLEX-PC  
Instrument type autoflex

Comment 1

Comment 2

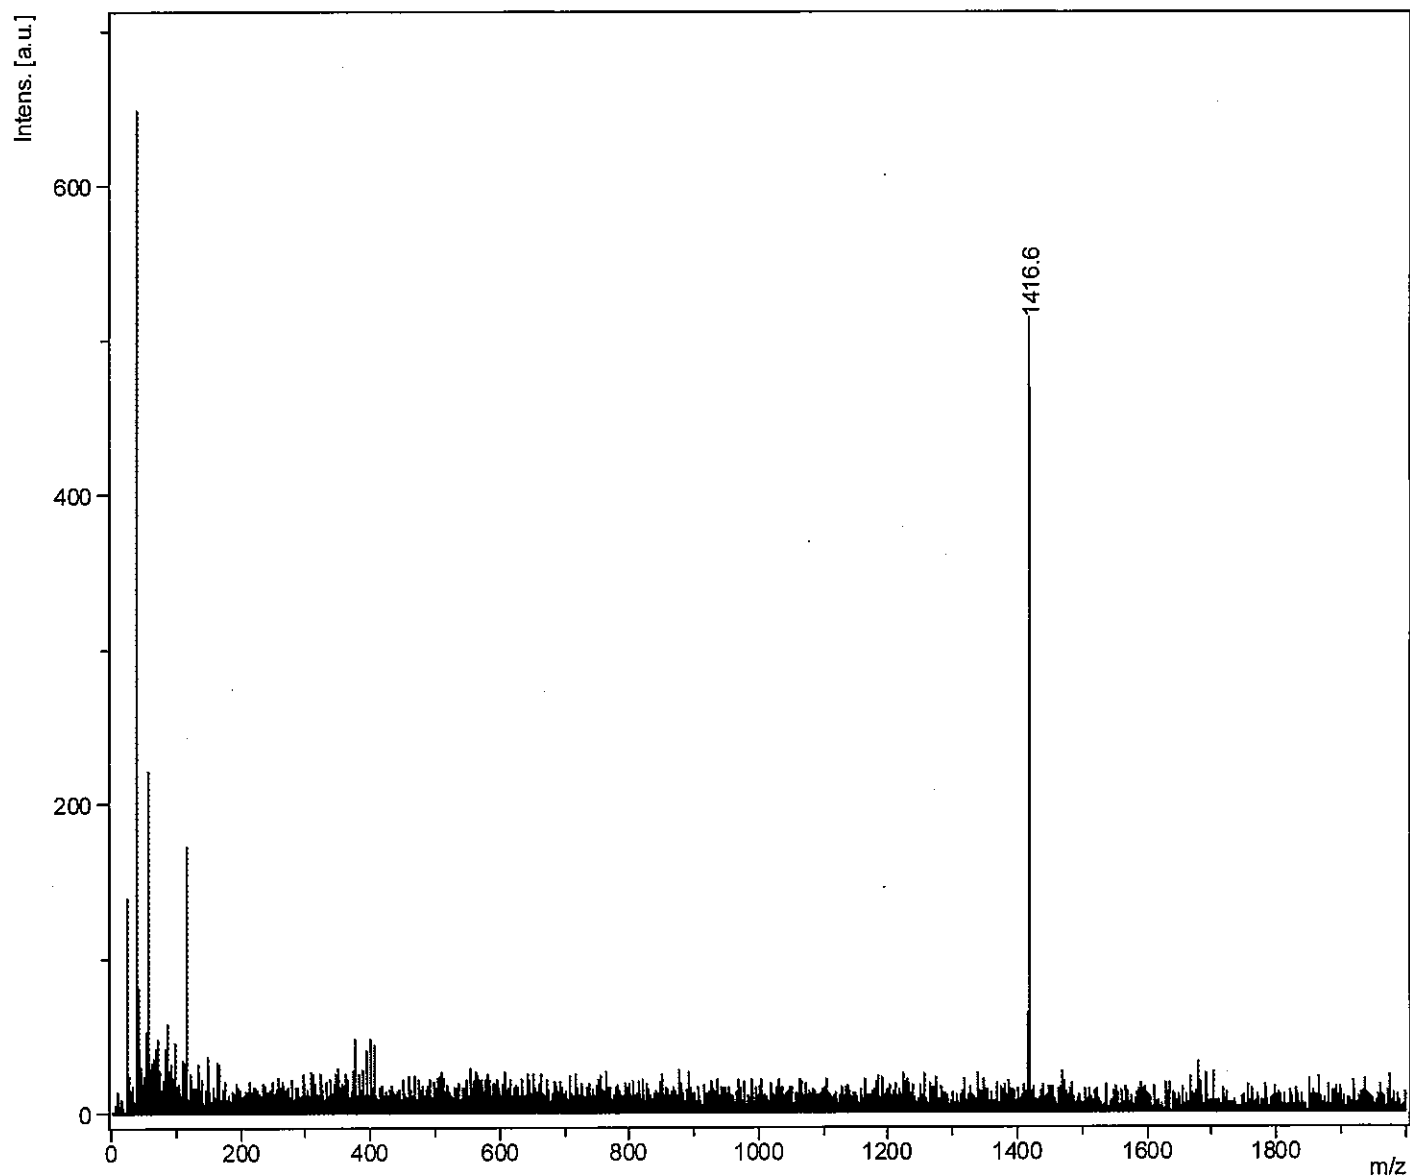

**Acquisition Parameter**

Date of acquisition 2017-06-05T11:26:13.812+09:00  
Acquisition method name D:\Methods\flexControlMethods\RP\_0-2000\_Da.par  
Acquisition operation mode Reflector  
Voltage polarity POS  
Number of shots 500  
Name of spectrum used for calibration  
Calibration reference list used

**Instrument Info**

User DoshisyaUniv  
Instrument FLEX-PC  
Instrument type autoflex

Comment 1

Comment 2

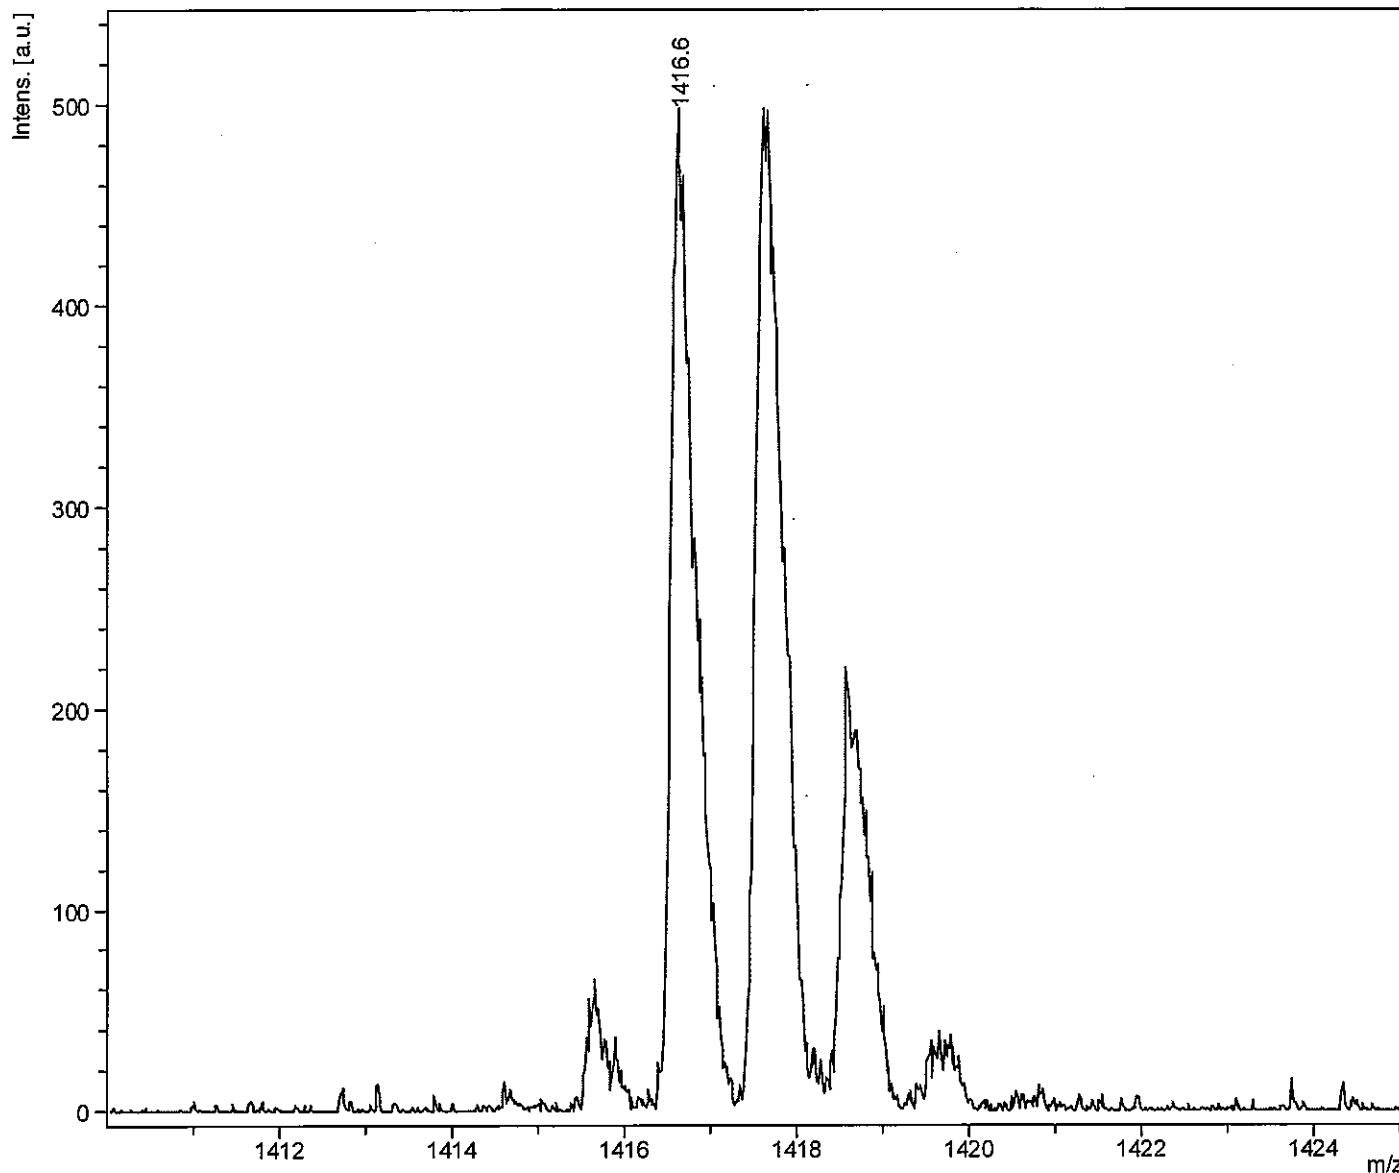

**Acquisition Parameter**

Date of acquisition 2017-06-05T11:26:13.812+09:00  
Acquisition method name D:\Methods\flexControlMethods\RP\_0-2000\_Da.par  
Acquisition operation mode Reflector  
Voltage polarity POS  
Number of shots 500  
Name of spectrum used for calibration  
Calibration reference list used

**Instrument Info**

User DoshisyaUniv  
Instrument FLEX-PC  
Instrument type autoflex

Comment 1

Comment 2

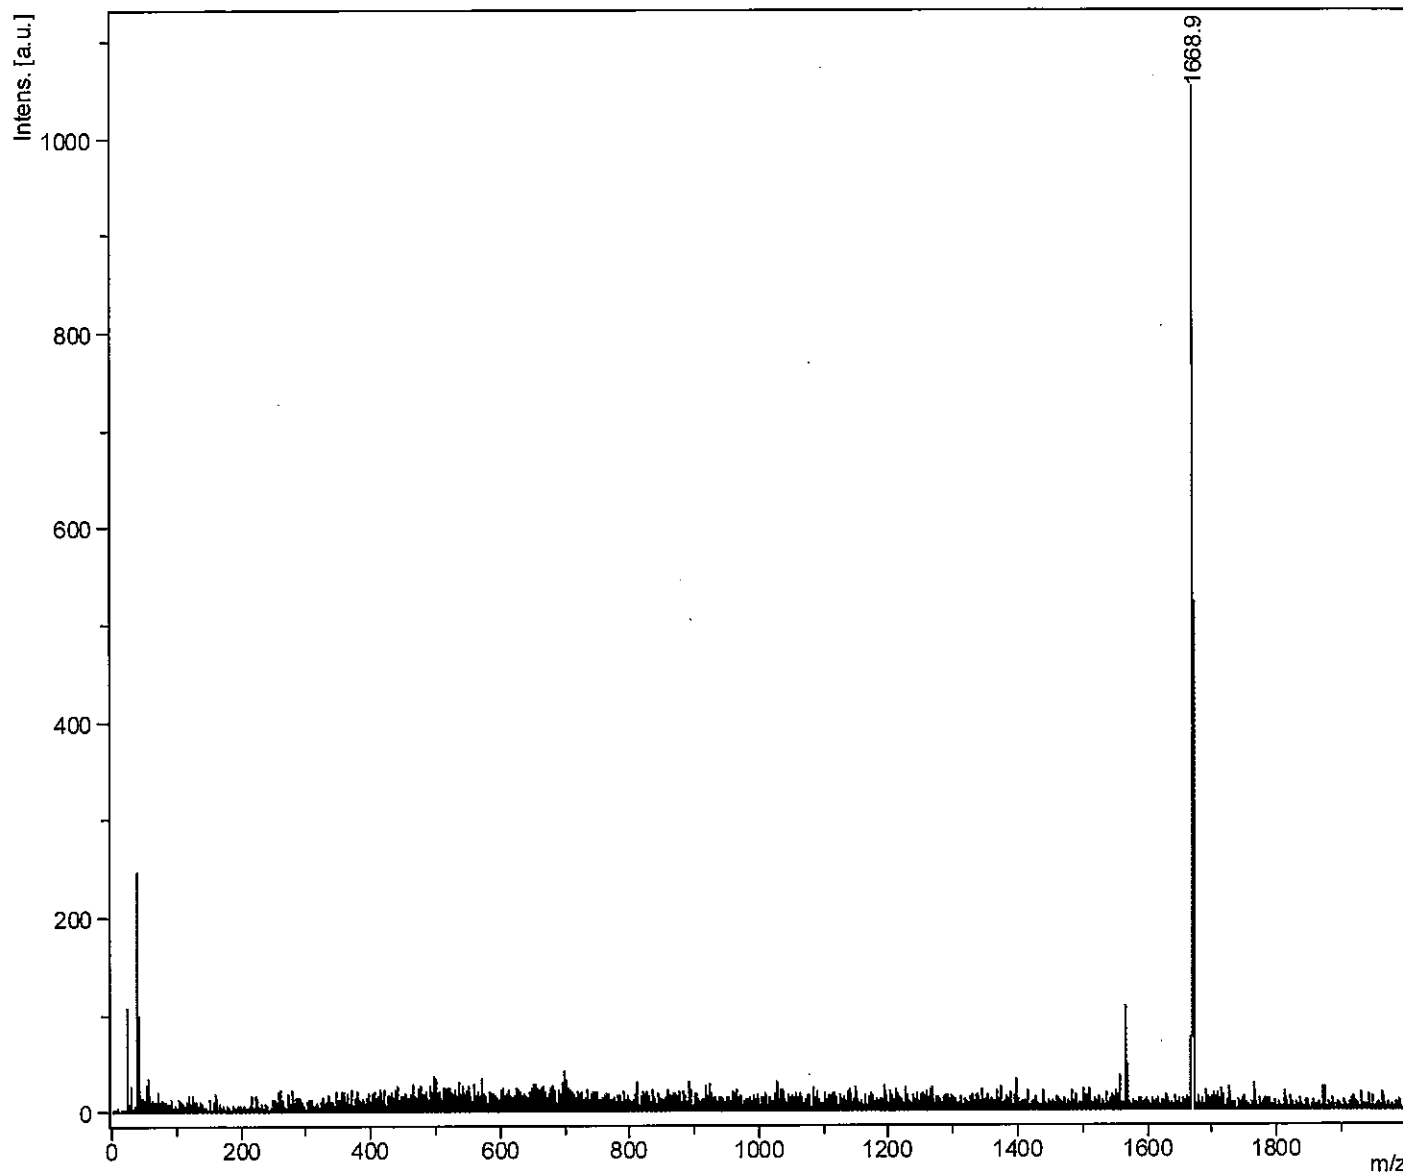

**Acquisition Parameter**

Date of acquisition 2017-06-05T11:28:34.437+09:00  
Acquisition method name D:\Methods\flexControlMethods\RP\_0-2000\_Da.par  
Acquisition operation mode Reflector  
Voltage polarity POS  
Number of shots 500  
Name of spectrum used for calibration  
Calibration reference list used

**Instrument Info**

User DoshisyaUniv  
Instrument FLEX-PC  
Instrument type autoflex

Comment 1

Comment 2

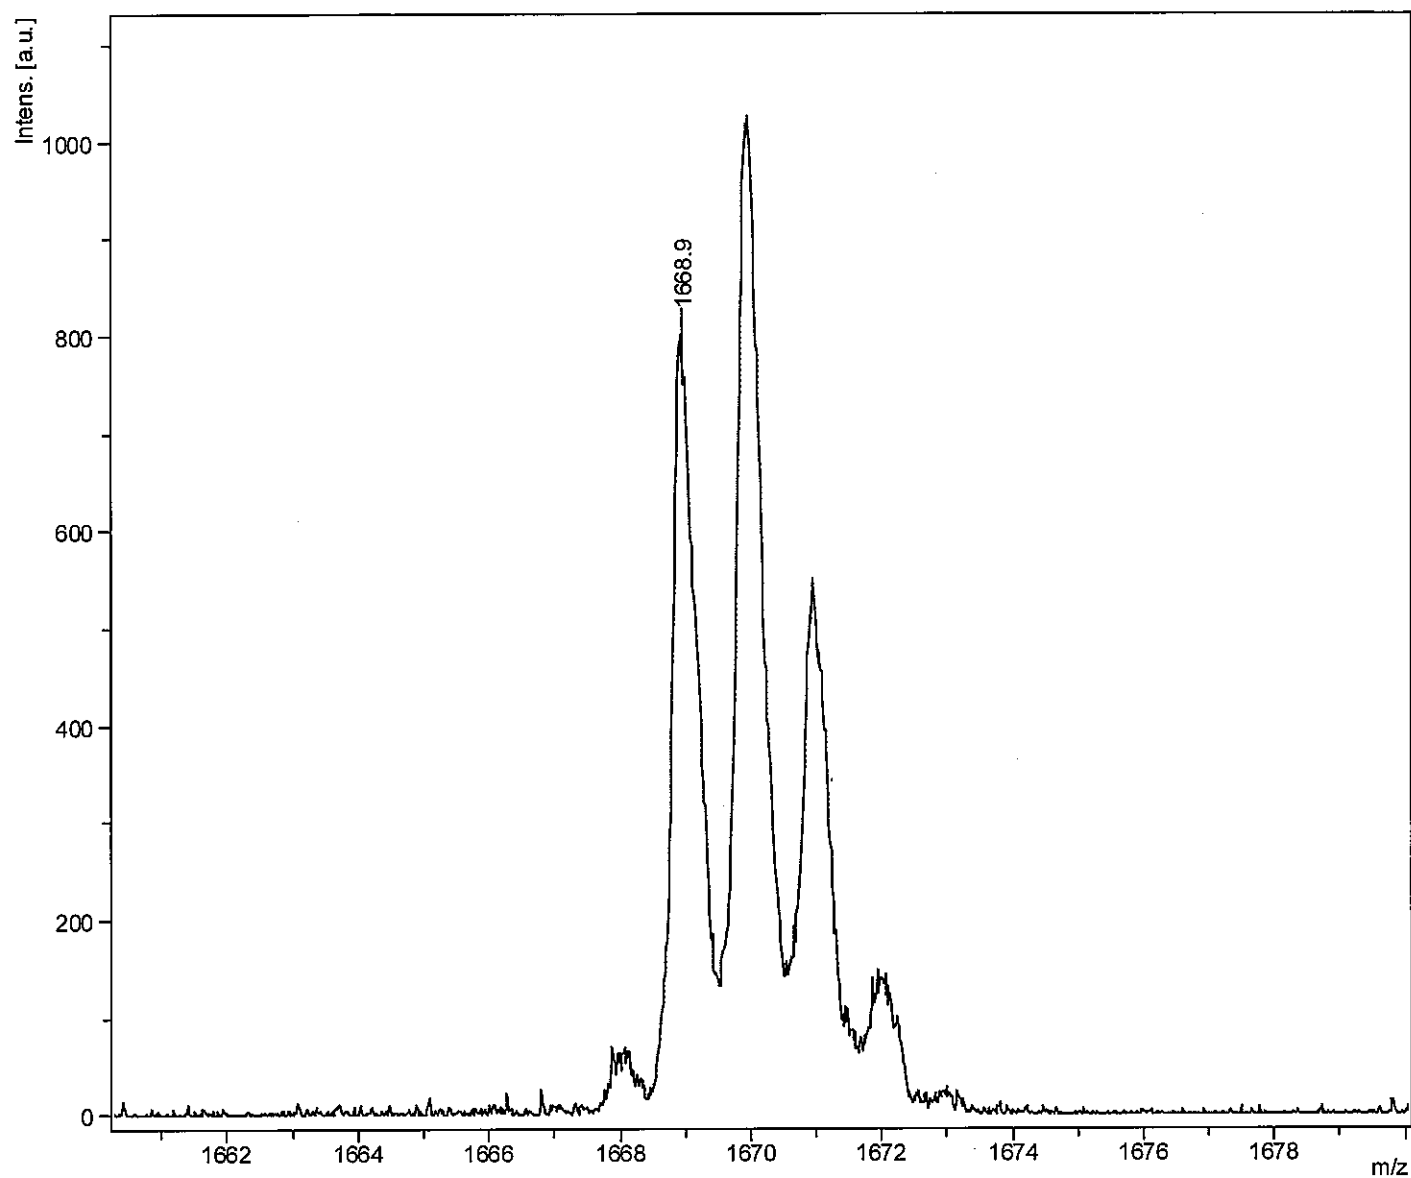

#### Acquisition Parameter

Date of acquisition 2017-06-05T11:28:34.437+09:00  
Acquisition method name D:\Methods\flexControlMethods\RP\_0-2000\_Da.par  
Acquisition operation mode Reflector  
Voltage polarity POS  
Number of shots 500  
Name of spectrum used for calibration  
Calibration reference list used

#### Instrument Info

User DoshisyaUniv  
Instrument FLEX-PC  
Instrument type autoflex

Comment 1

Comment 2

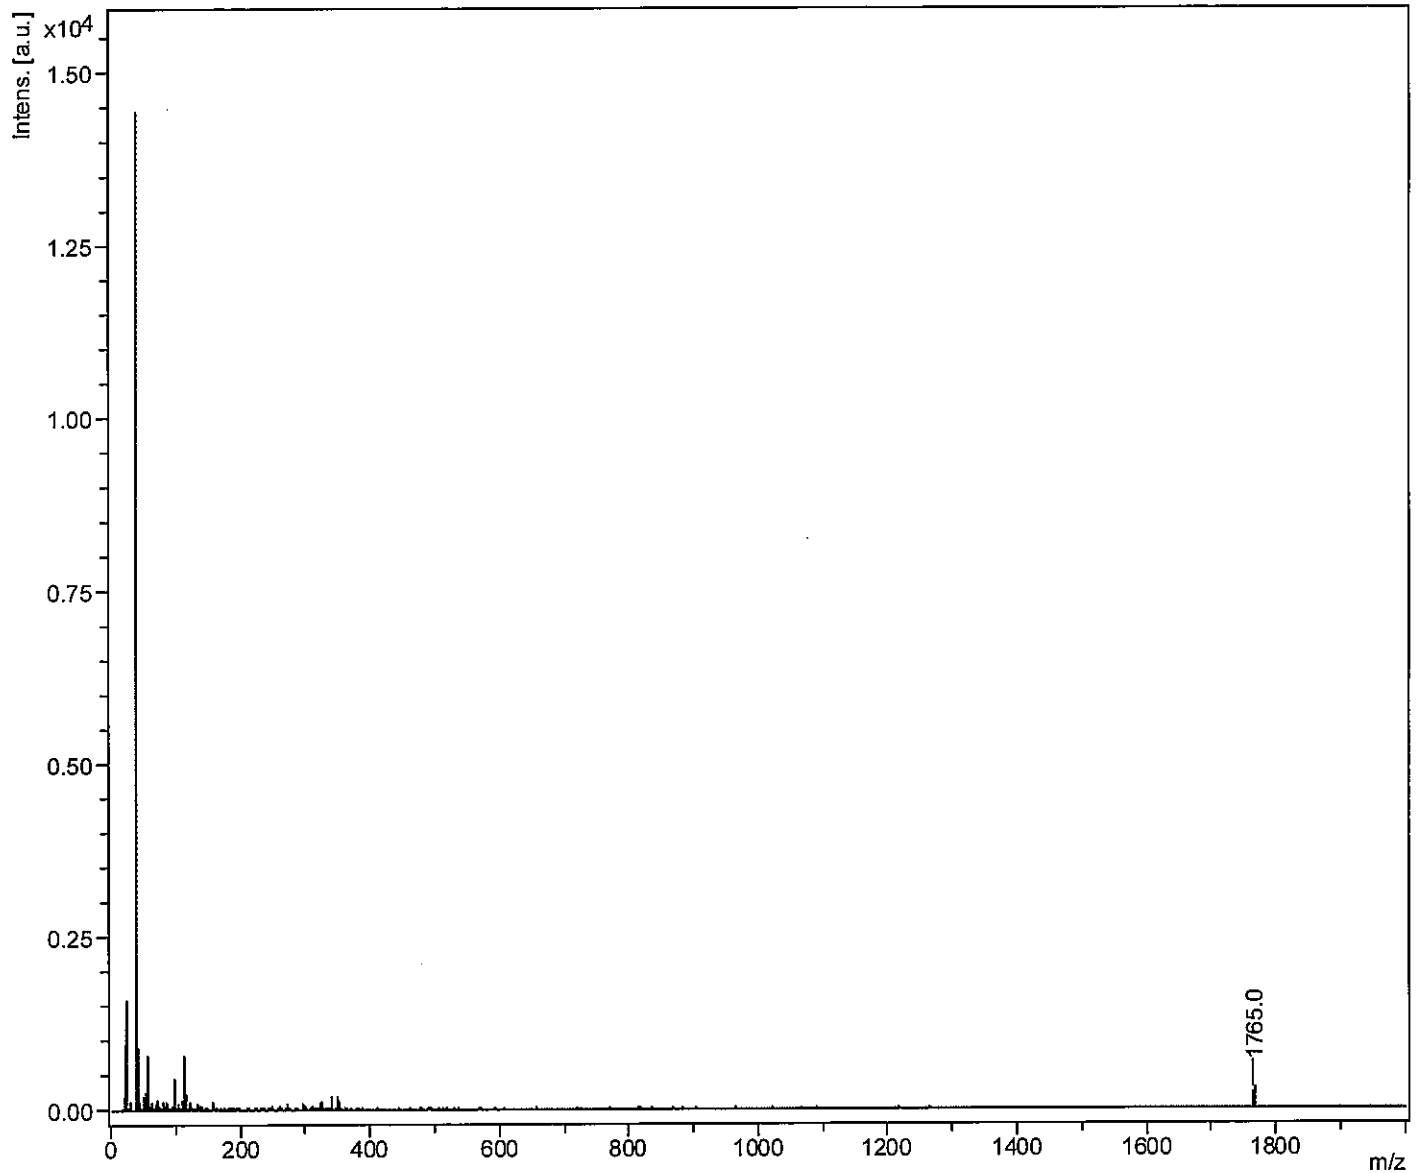

**Acquisition Parameter**

Date of acquisition 2017-06-05T11:32:45.937+09:00  
Acquisition method name D:\Methods\flexControlMethods\RP\_0-2000\_Da.par  
Acquisition operation mode Reflector  
Voltage polarity POS  
Number of shots 500  
Name of spectrum used for calibration  
Calibration reference list used

**Instrument Info**

User DoshisyaUniv  
Instrument FLEX-PC  
Instrument type autoflex

Comment 1

Comment 2

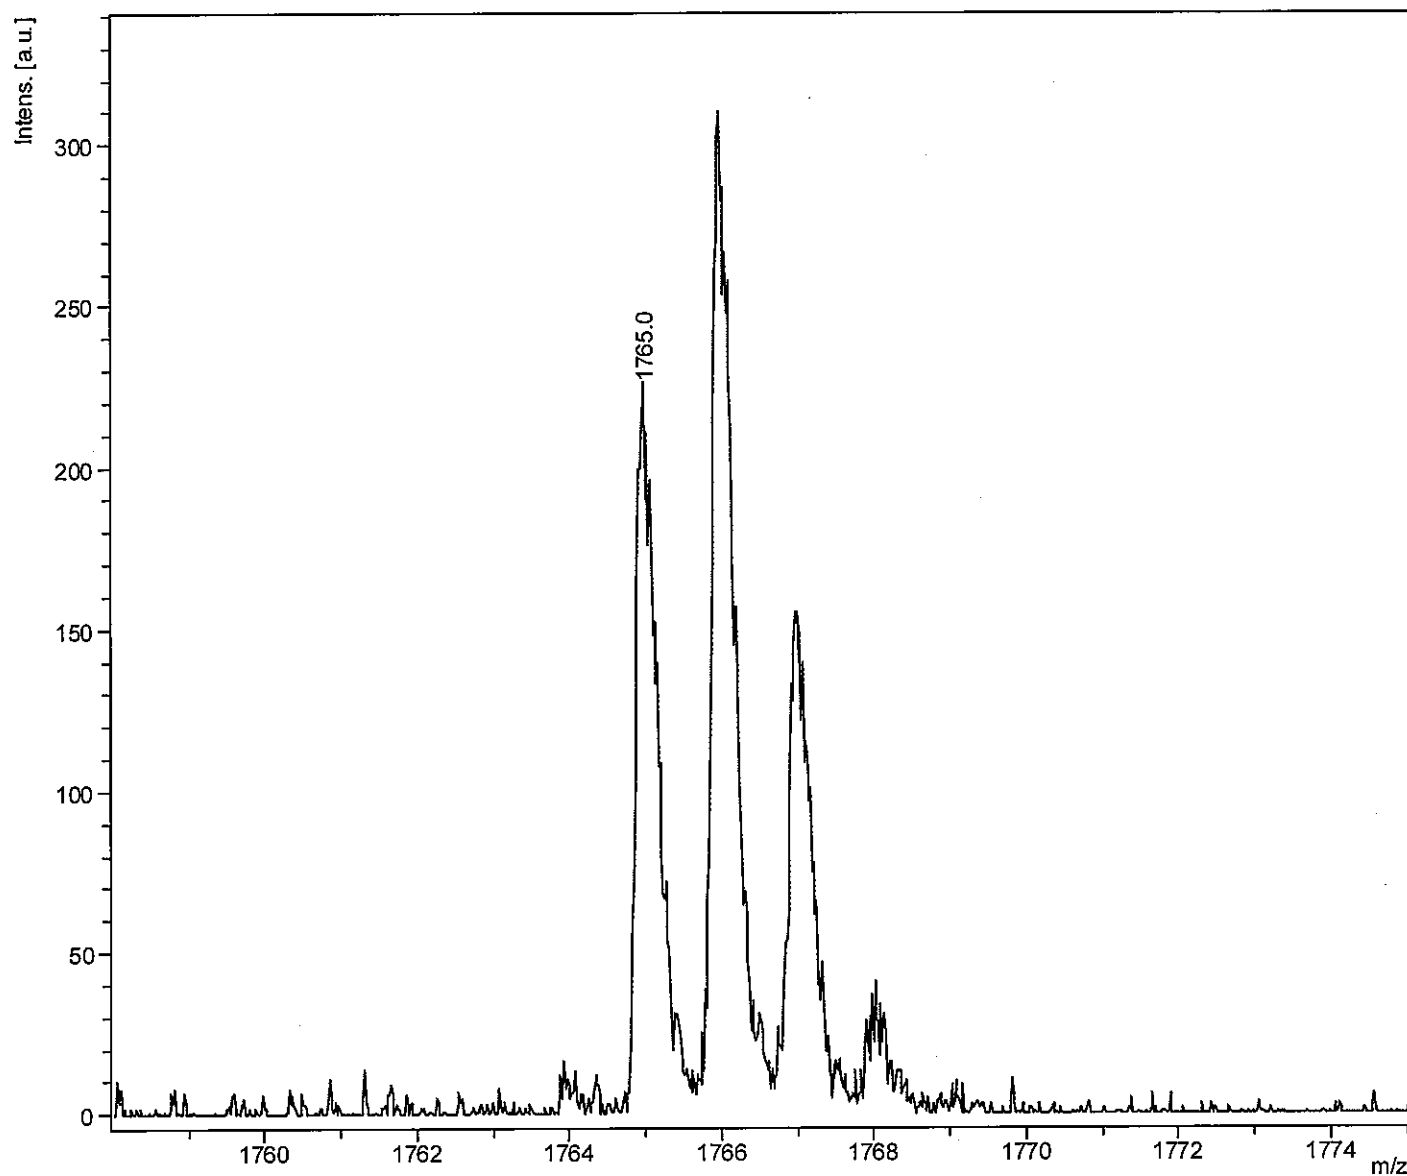

**Acquisition Parameter**

Date of acquisition 2017-06-05T11:32:45.937+09:00  
Acquisition method name D:\Methods\flexControlMethods\RP\_0-2000\_Da.par  
Acquisition operation mode Reflector  
Voltage polarity POS  
Number of shots 500  
Name of spectrum used for calibration  
Calibration reference list used

**Instrument Info**

User DoshisyaUniv  
Instrument FLEX-PC  
Instrument type autoflex

Figure S30. MALDI-TOF mass spectrum of 2f (Molecular ion peaks).



Comment 1

Comment 2

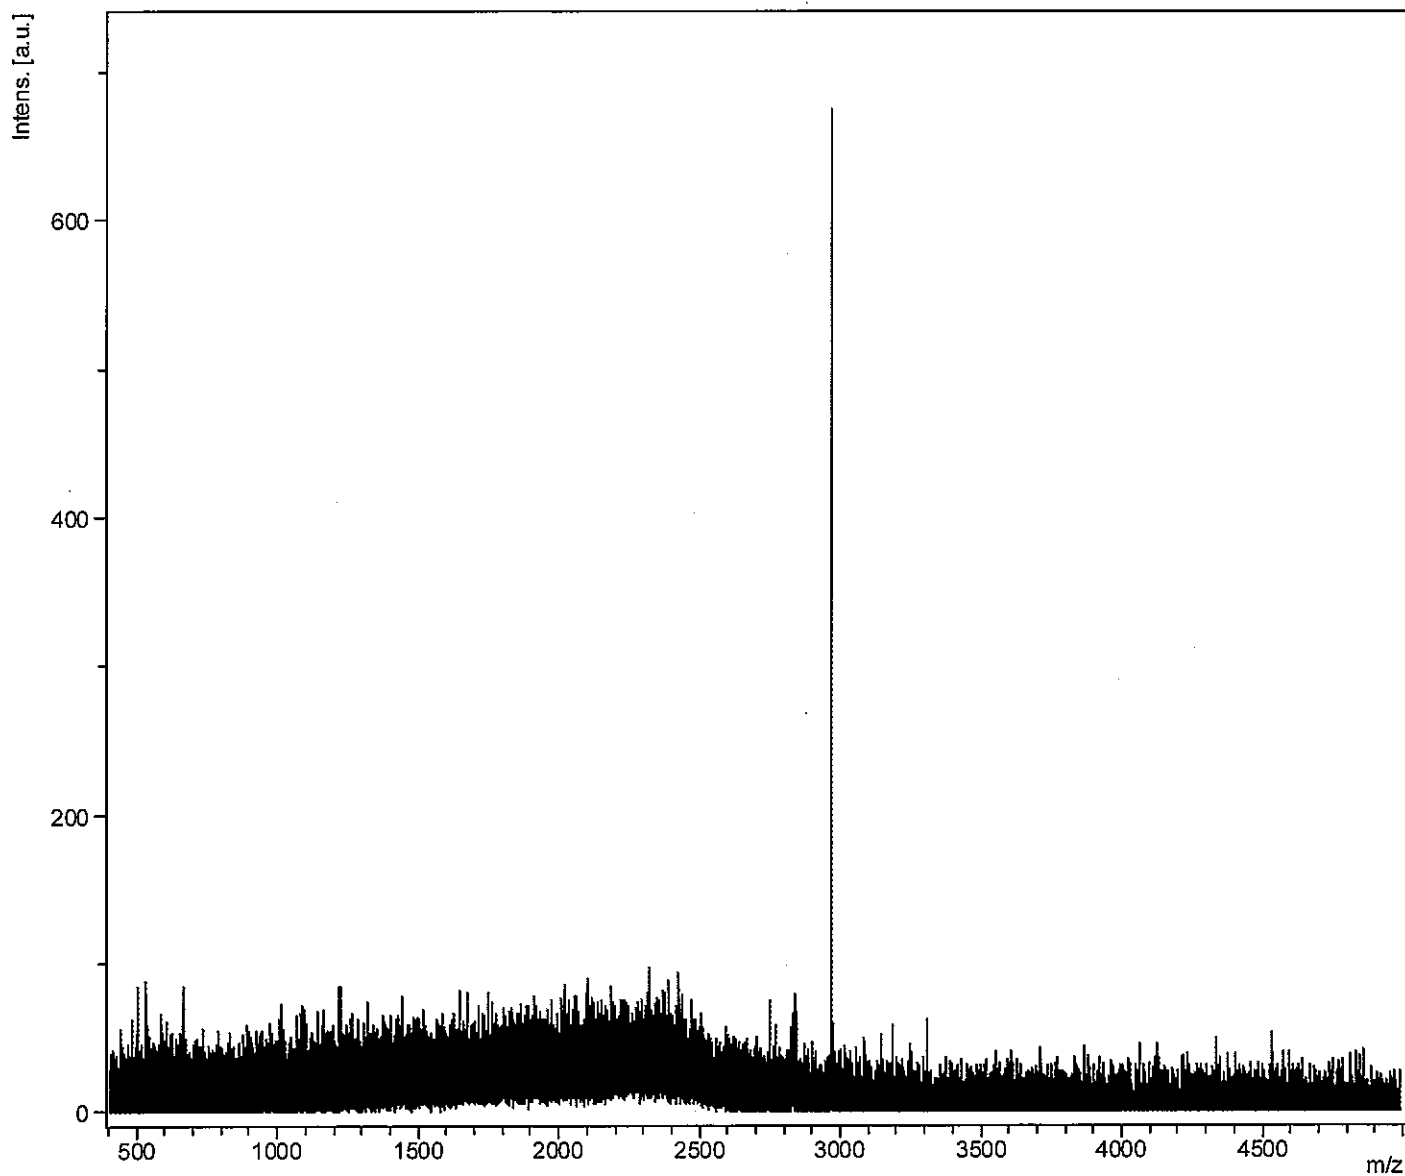

**Acquisition Parameter**

Date of acquisition 2017-06-05T16:14:28.453+09:00  
Acquisition method name D:\Methods\flexControlMethods\RP\_700-4500\_Da.par  
Acquisition operation mode Reflector  
Voltage polarity POS  
Number of shots 500  
Name of spectrum used for calibration  
Calibration reference list used

**Instrument Info**

User DoshisyaUniv  
Instrument FLEX-PC  
Instrument type autoflex

Comment 1

Comment 2

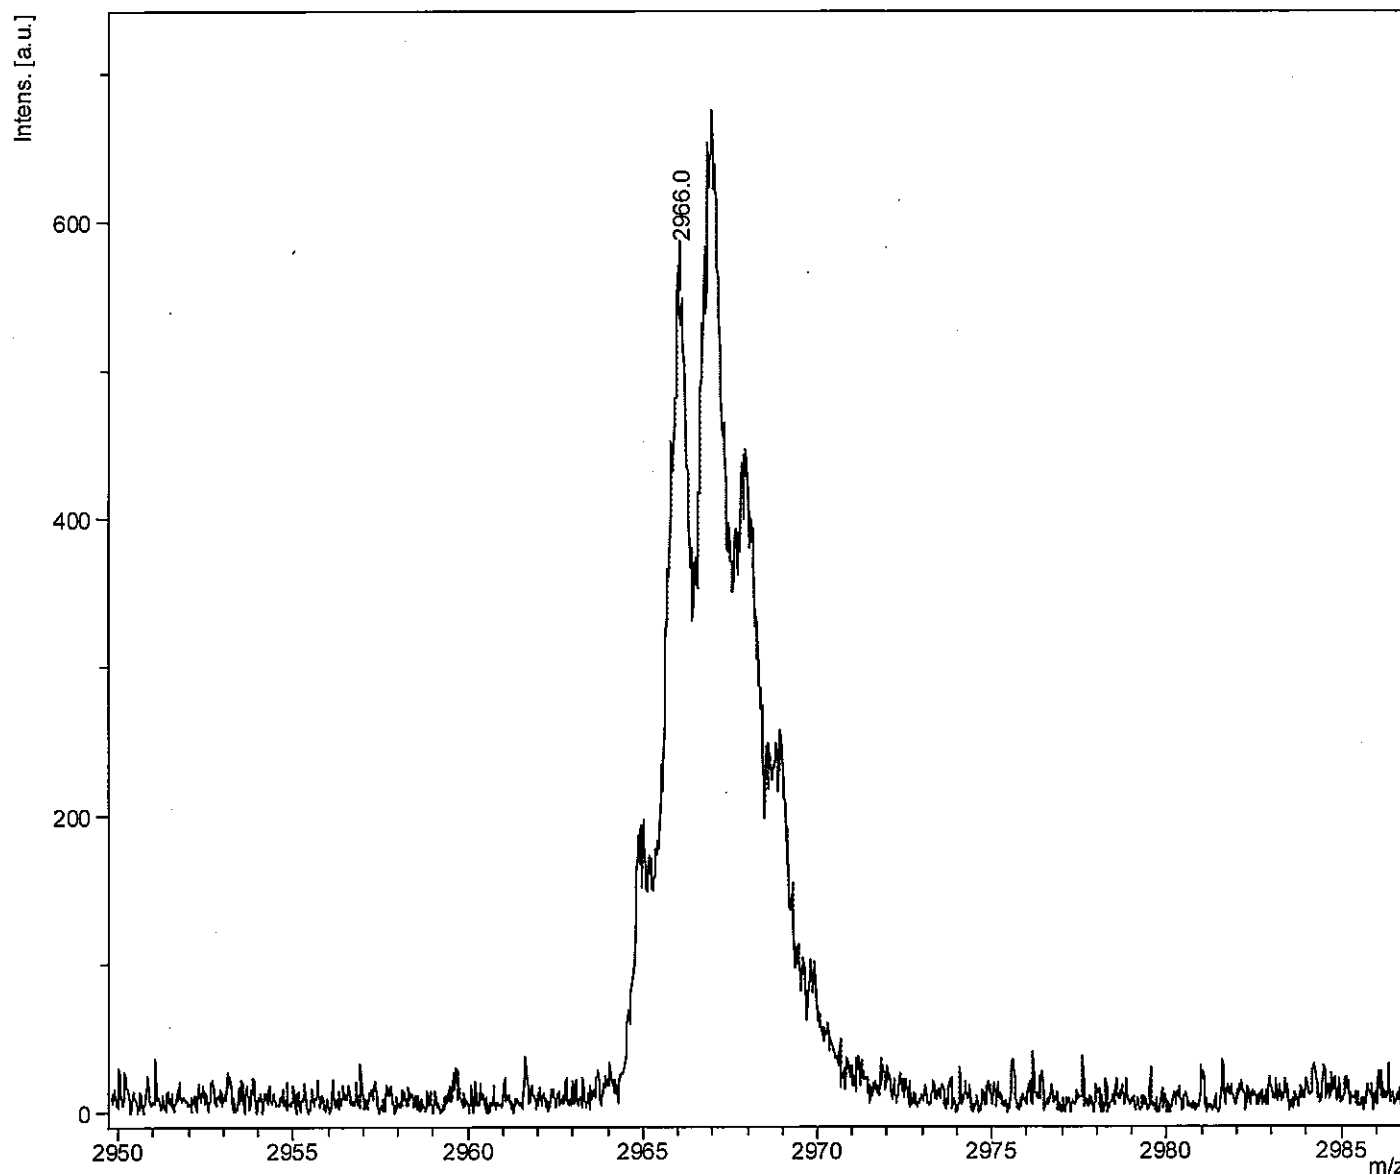

**Acquisition Parameter**

Date of acquisition 2017-06-05T16:14:28.453+09:00  
Acquisition method name D:\Methods\flexControlMethods\RP\_700-4500\_Da.par  
Acquisition operation mode Reflector  
Voltage polarity POS  
Number of shots 500  
Name of spectrum used for calibration  
Calibration reference list used

**Instrument Info**

User DoshisyaUniv  
Instrument FLEX-PC  
Instrument type autoflex

Comment 1

Comment 2

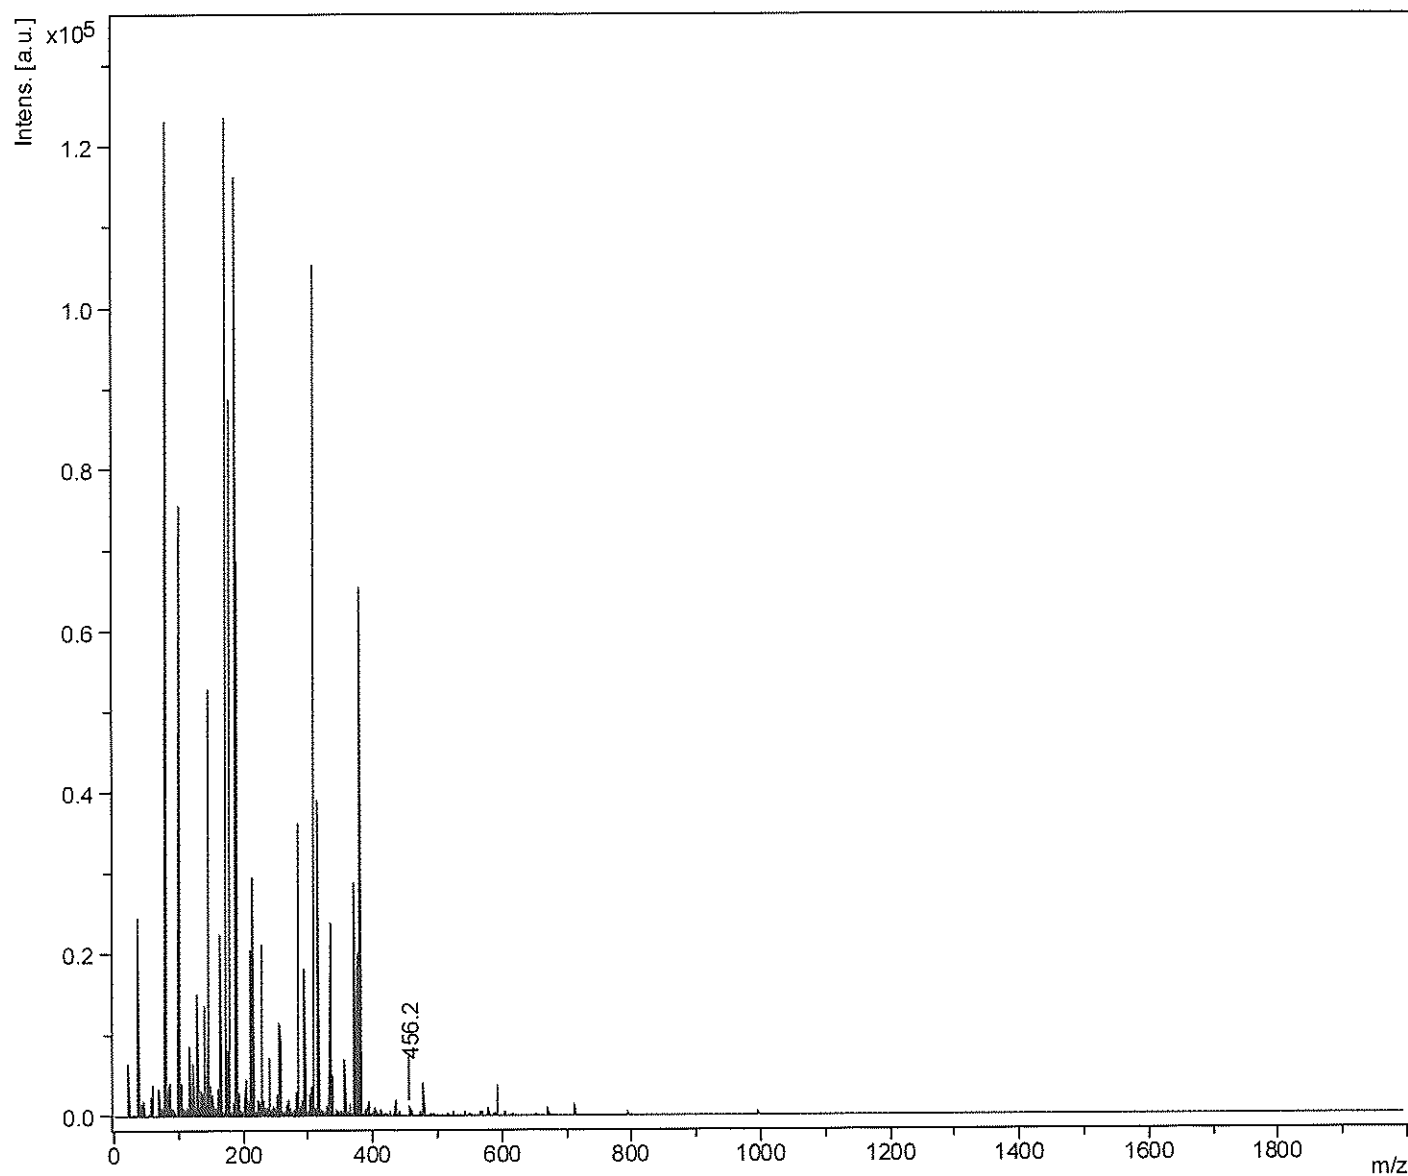

#### Acquisition Parameter

Date of acquisition 2017-07-31T15:26:52.656+09:00  
Acquisition method name D:\Methods\flexControlMethods\RP\_0-2000\_Da.par  
Acquisition operation mode Reflector  
Voltage polarity POS  
Number of shots 500  
Name of spectrum used for calibration  
Calibration reference list used

#### Instrument Info

User DoshisyaUniv  
Instrument FLEX-PC  
Instrument type autoflex

Comment 1

Comment 2

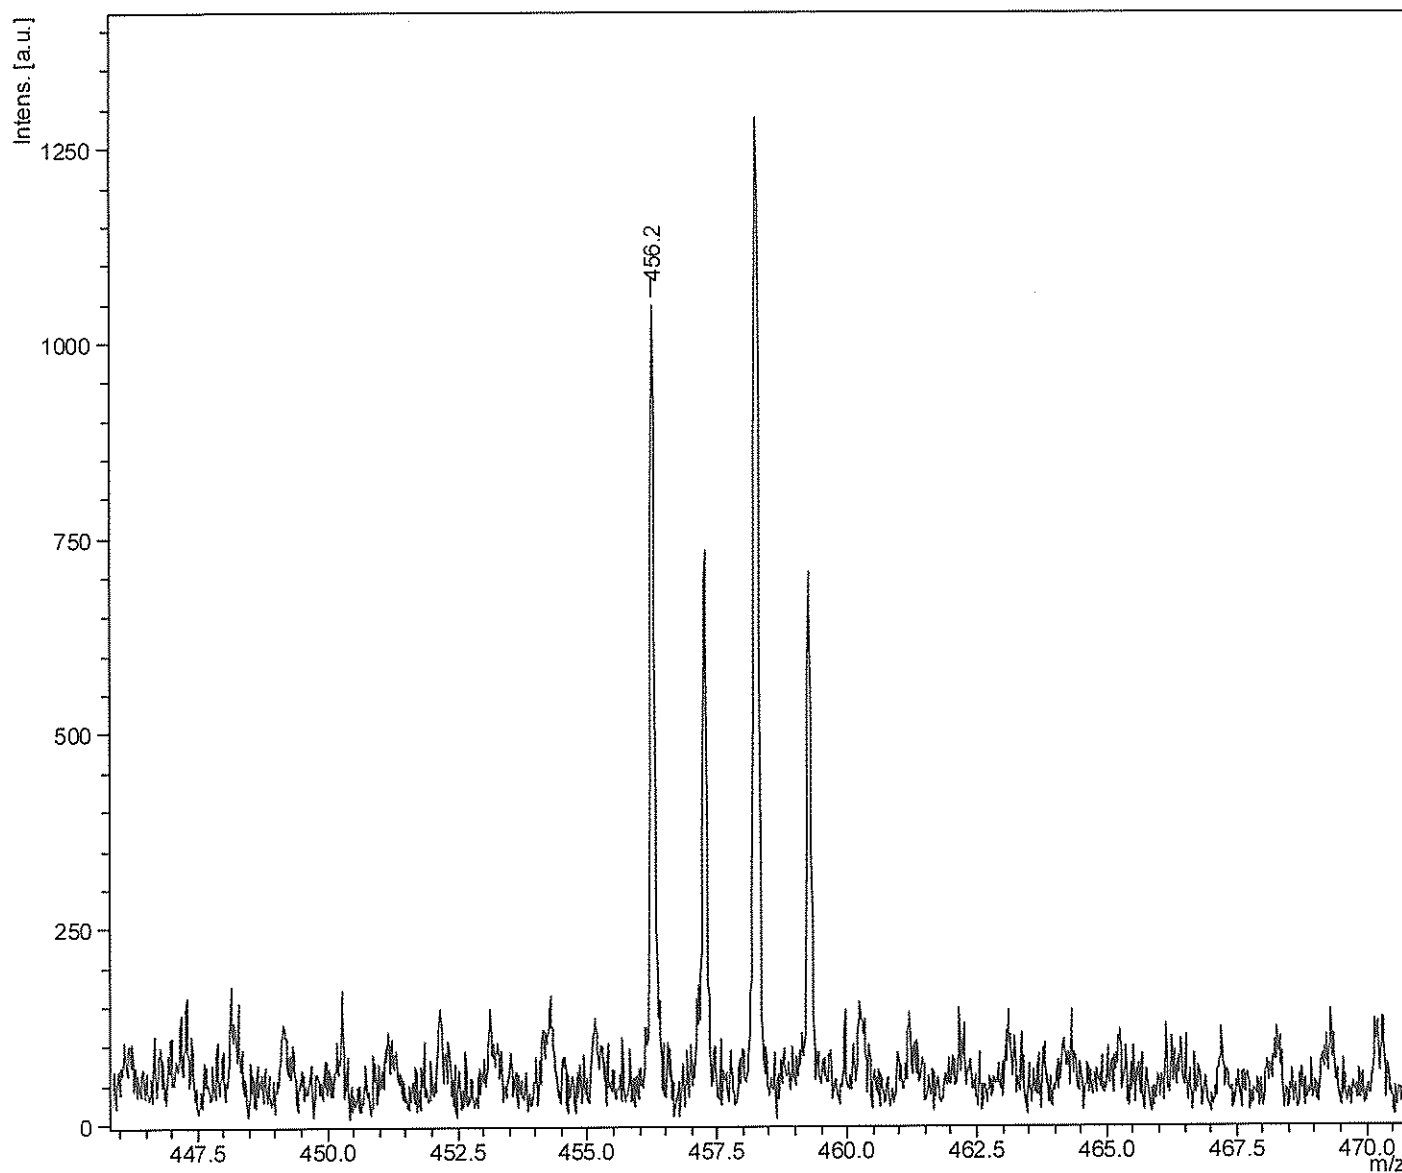

#### Acquisition Parameter

Date of acquisition 2017-07-31T15:26:52.656+09:00  
Acquisition method name D:\Methods\flexControlMethods\RP\_0-2000\_Da.par  
Acquisition operation mode Reflector  
Voltage polarity POS  
Number of shots 500  
Name of spectrum used for calibration  
Calibration reference list used

#### Instrument Info

User DoshisyaUniv  
Instrument FLEX-PC  
Instrument type autoflex

Comment 1

Comment 2

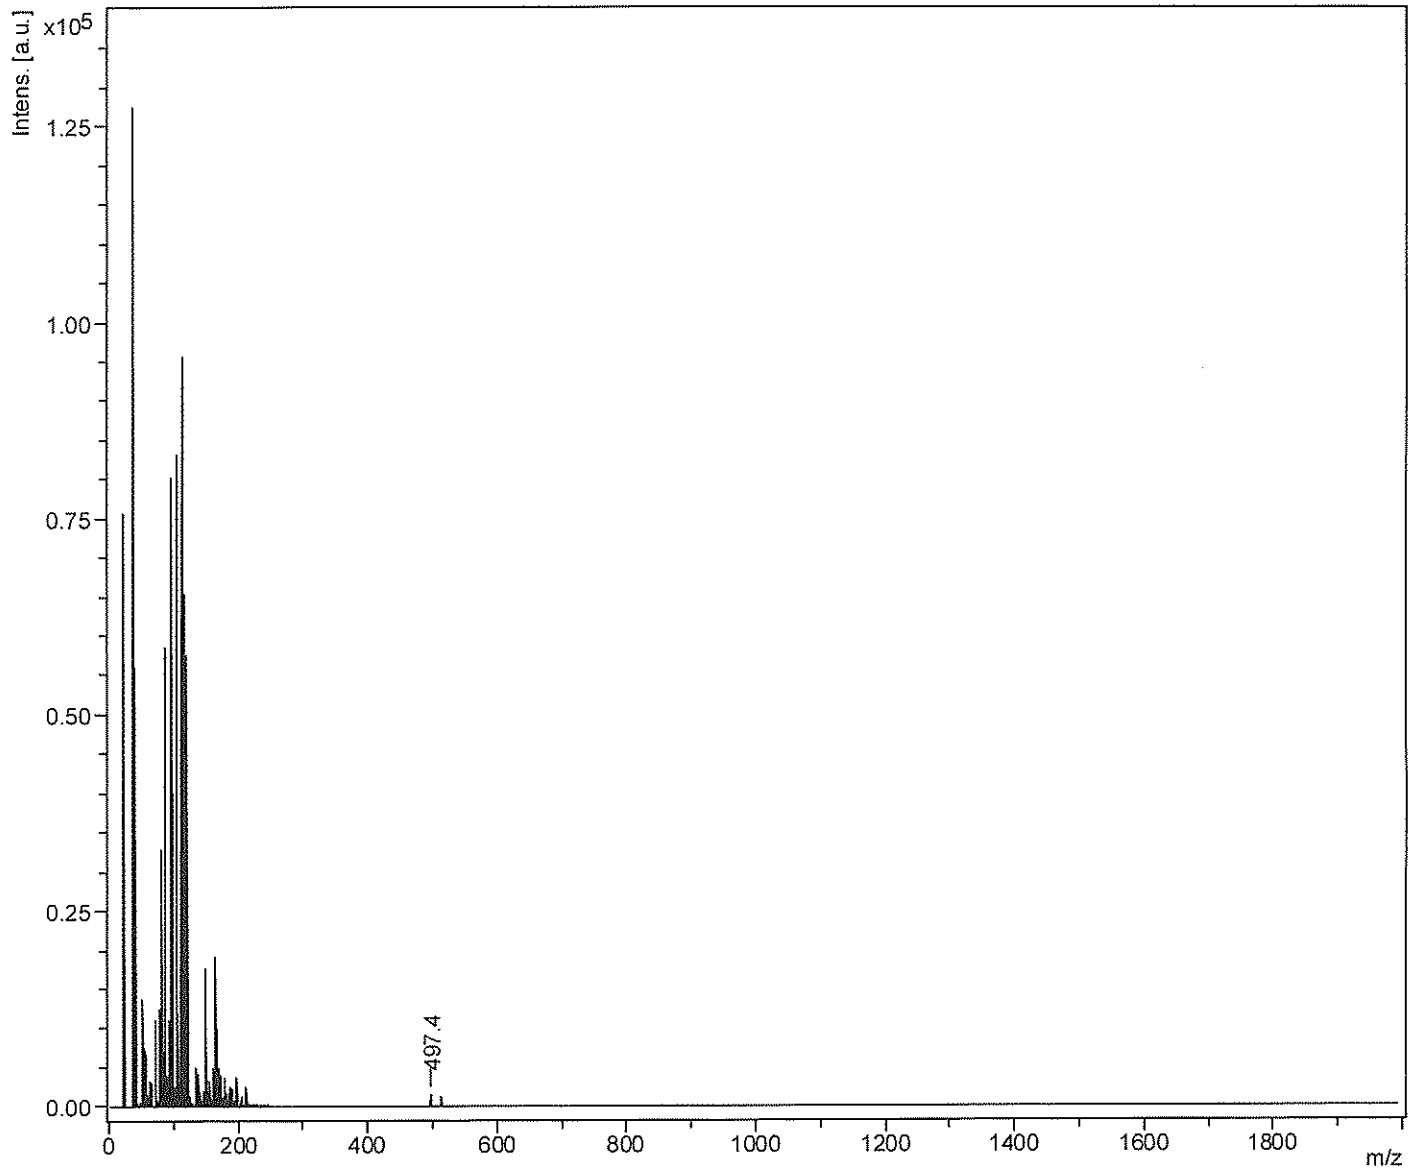

**Acquisition Parameter**

Date of acquisition 2017-07-31T15:39:46.125+09:00  
Acquisition method name D:\Methods\flexControlMethods\RP\_0-2000\_Da.par  
Acquisition operation mode Reflector  
Voltage polarity POS  
Number of shots 500  
Name of spectrum used for calibration  
Calibration reference list used

**Instrument Info**

User DoshisyaUniv  
Instrument FLEX-PC  
Instrument type autoflex

Figure S33. MALDI-TOF mass spectrum of 14.

Comment 1

Comment 2

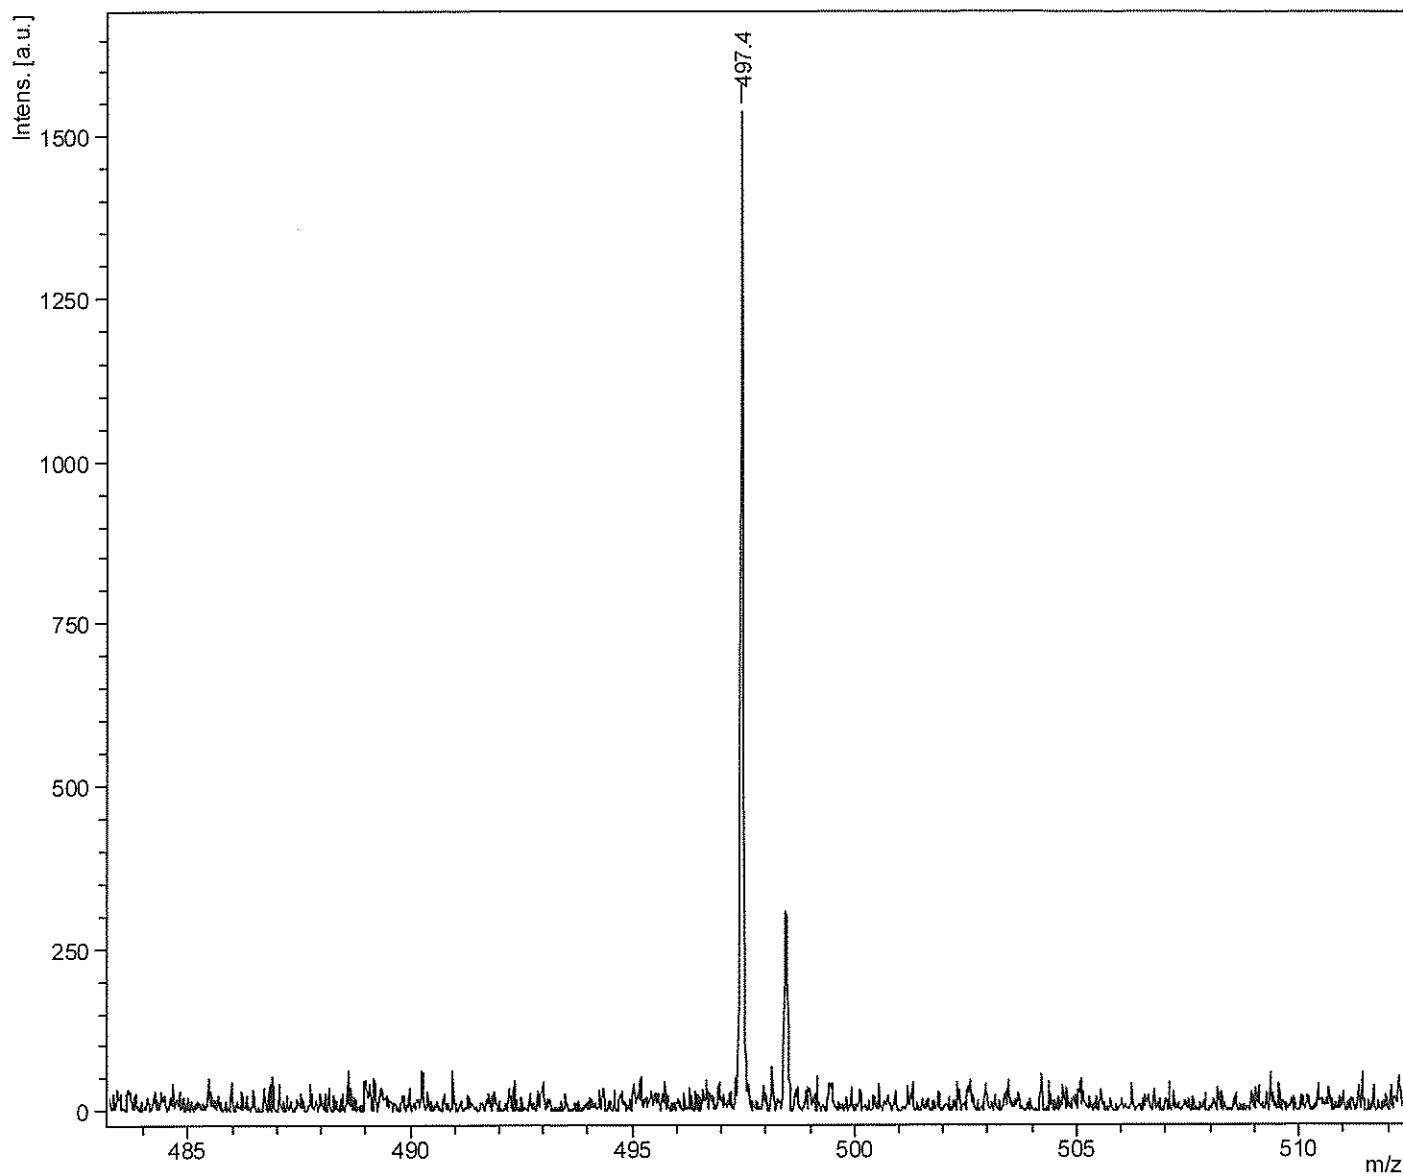

**Acquisition Parameter**

Date of acquisition 2017-07-31T15:39:46.125+09:00  
Acquisition method name D:\Methods\flexControl\Methods\RP\_0-2000\_Da.par  
Acquisition operation mode Reflector  
Voltage polarity POS  
Number of shots 500  
Name of spectrum used for calibration  
Calibration reference list used

**Instrument Info**

User DoshisyaUniv  
Instrument FLEX-PC  
Instrument type autoflex

Comment 1

Comment 2

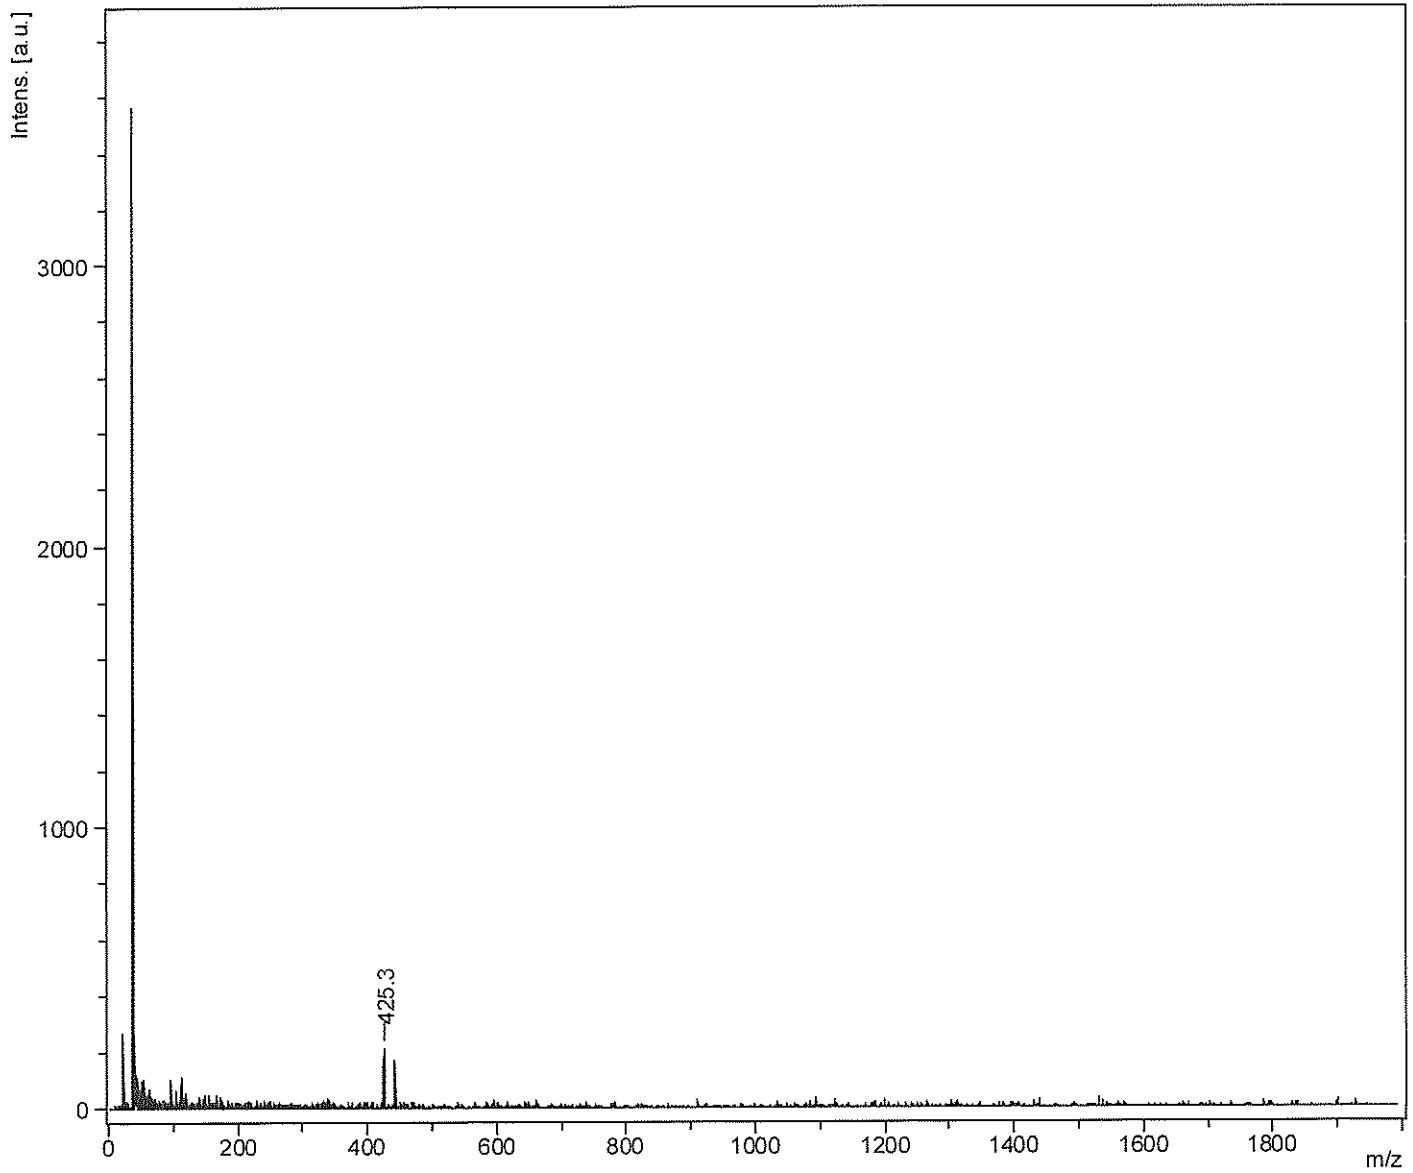

**Acquisition Parameter**

Date of acquisition 2017-07-31T15:34:53.203+09:00  
Acquisition method name D:\Methods\flexControlMethods\RP\_0-2000\_Da.par  
Acquisition operation mode Reflector  
Voltage polarity POS  
Number of shots 500  
Name of spectrum used for calibration  
Calibration reference list used

**Instrument Info**

User DoshisyaUniv  
Instrument FLEX-PC  
Instrument type autoflex

Figure S34. MALDI-TOF mass spectrum of 15.

Comment 1

Comment 2

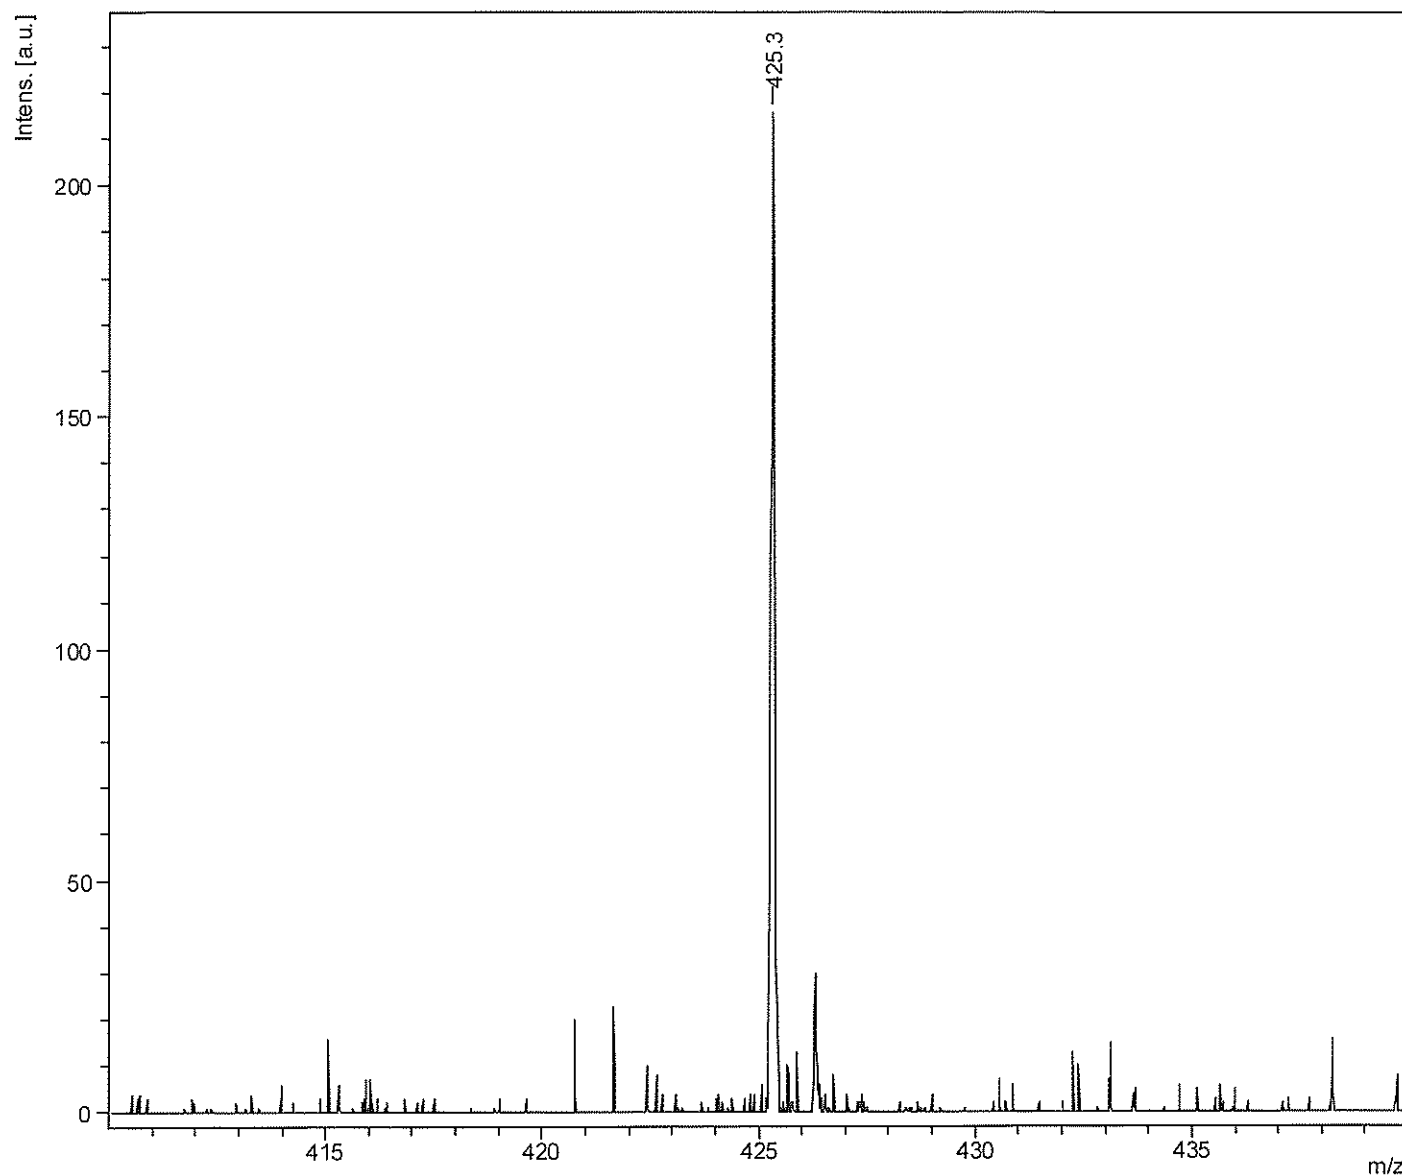

#### Acquisition Parameter

Date of acquisition 2017-07-31T15:34:53.203+09:00  
Acquisition method name D:\Methods\flexControlMethods\RP\_0-2000\_Da.par  
Acquisition operation mode Reflector  
Voltage polarity POS  
Number of shots 500  
Name of spectrum used for calibration  
Calibration reference list used

#### Instrument Info

User DoshisyaUniv  
Instrument FLEX-PC  
Instrument type autoflex



## &lt;Sample&gt;

Sample name : **1a**  
Sample ID : takagi  
File name : 20170529.lcd  
Method : SubPc.lcm  
: 1-1  
Sample vol : 1000 uL  
Date Meas. : 2017/06/07 14:37:56  
Date Anal. : 2017/06/07 14:57:59

## &lt;Chromatogram&gt;

mV

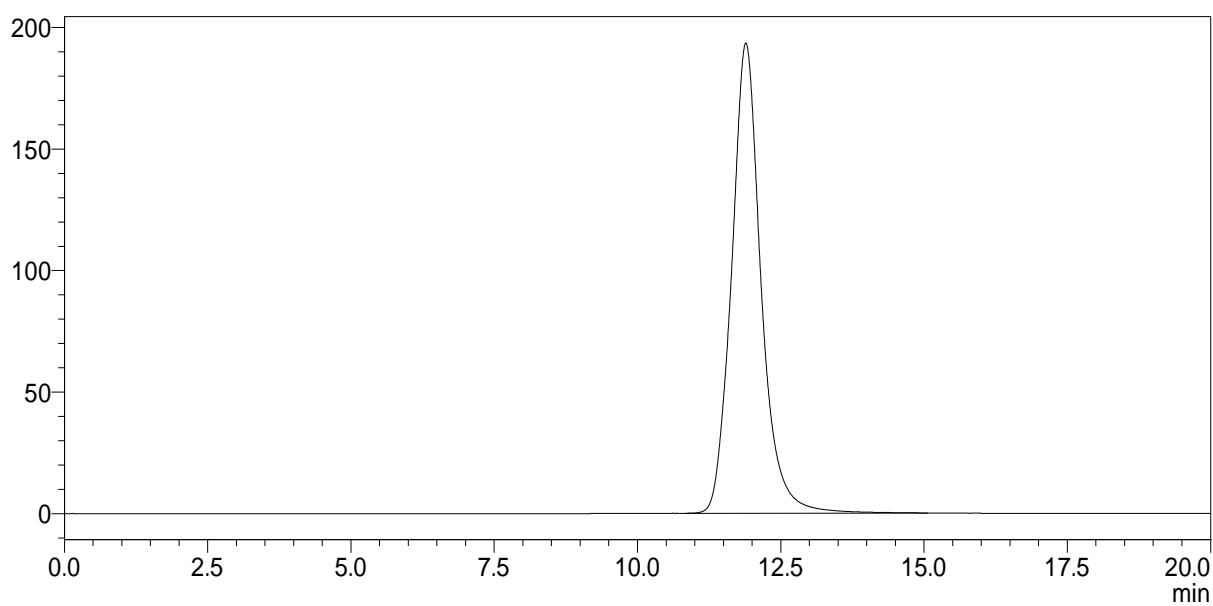

## &lt;Peak List&gt;

Detector A Ch2

| Peak# | Ret. time | Area    | Hight  | Conc. | Area%   |
|-------|-----------|---------|--------|-------|---------|
| 1     | 11.890    | 6923546 | 193529 | 0.000 | 100.000 |
| Sum   |           | 6923546 | 193529 |       | 100.000 |

Figure S35. HPLC chart of **1a**.

**<Sample>**

Sample name : **1b**  
 Sample ID : takagi  
 File name : 20170545.lcd  
 Method : SubPc.lcm  
 :  
 Sample vol : 1-1  
 Date Meas. : 1000 uL  
 Date Anal. : 2017/06/08 17:23:10  
 : 2017/06/08 17:43:13

**<Chromatogram>**

mV

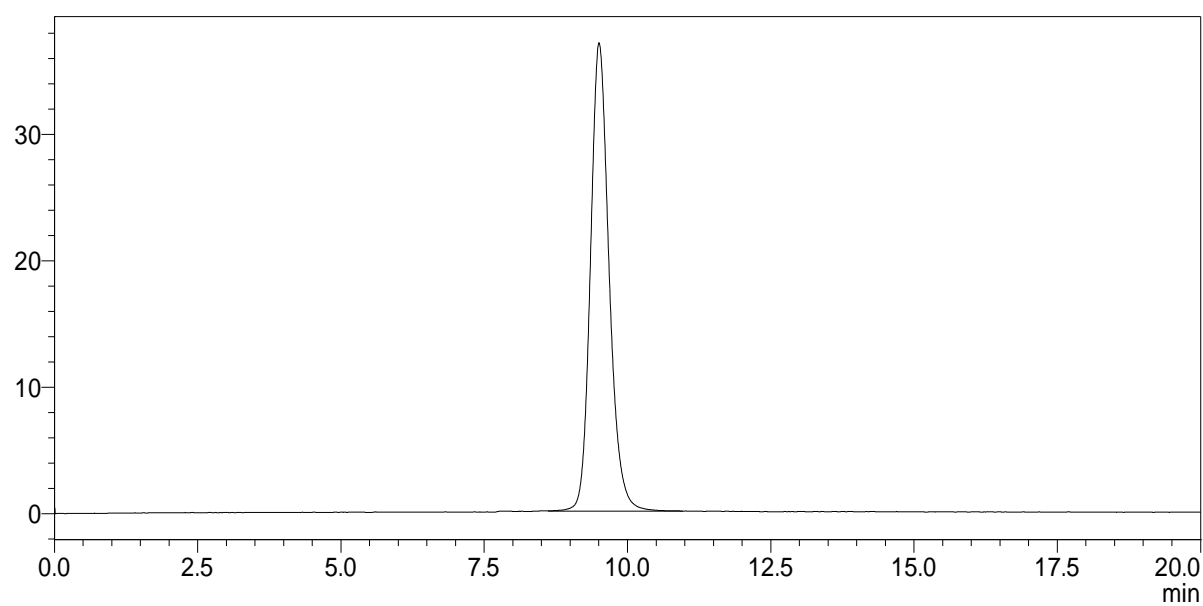**<Peak List>**

Detector A Ch2 680 nm

| Peak# | Ret Time | Area   | Hight | Conc  | Area%   |
|-------|----------|--------|-------|-------|---------|
| 1     | 9.505    | 841556 | 37046 | 0.000 | 100.000 |
| Sum   |          | 841556 | 37046 |       | 100.000 |

Figure S36. HPLC chart of **1b**.

## &lt;Sample&gt;

Sample name : **1c**  
Sample ID : takagi  
File name : 20170546.lcd  
Method : SubPc.lcm  
:  
Sample vol : 1-1  
Date Meas. : 1000 uL  
Date Anal. : 2017/06/08 18:38:10  
: 2017/06/08 18:58:12

## &lt;Chromatogram&gt;

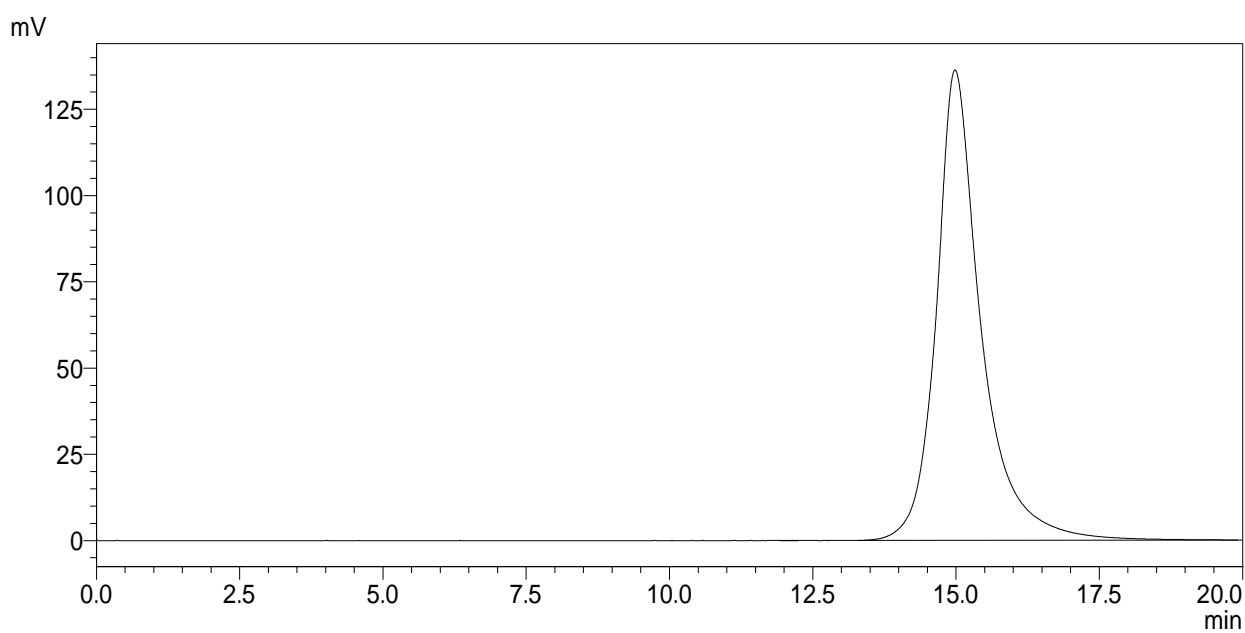

## &lt;Peak List&gt;

Detector A Ch2 680 nm

| Peak# | Ret. time | Area    | Hight  | Conc. | Area%   |
|-------|-----------|---------|--------|-------|---------|
| 1     | 12.136    | 1124    | 71     | 0.000 | 0.015   |
| 2     | 14.983    | 7442767 | 136370 | 0.000 | 99.985  |
| Sum   |           | 7443891 | 136441 |       | 100.000 |

Figure S37. HPLC chart of **1c**.

**<Sample>**

Sample name : **1d**  
 Sample ID : takagi  
 File name : 20170533.lcd  
 Method : SubPc.lcm  
 :  
 Sample vol : 1-1  
 Date Meas. : 1000 uL  
 Date Anal. : 2017/06/07 17:02:47  
 : 2017/06/07 17:22:49

**<Chromatogram>**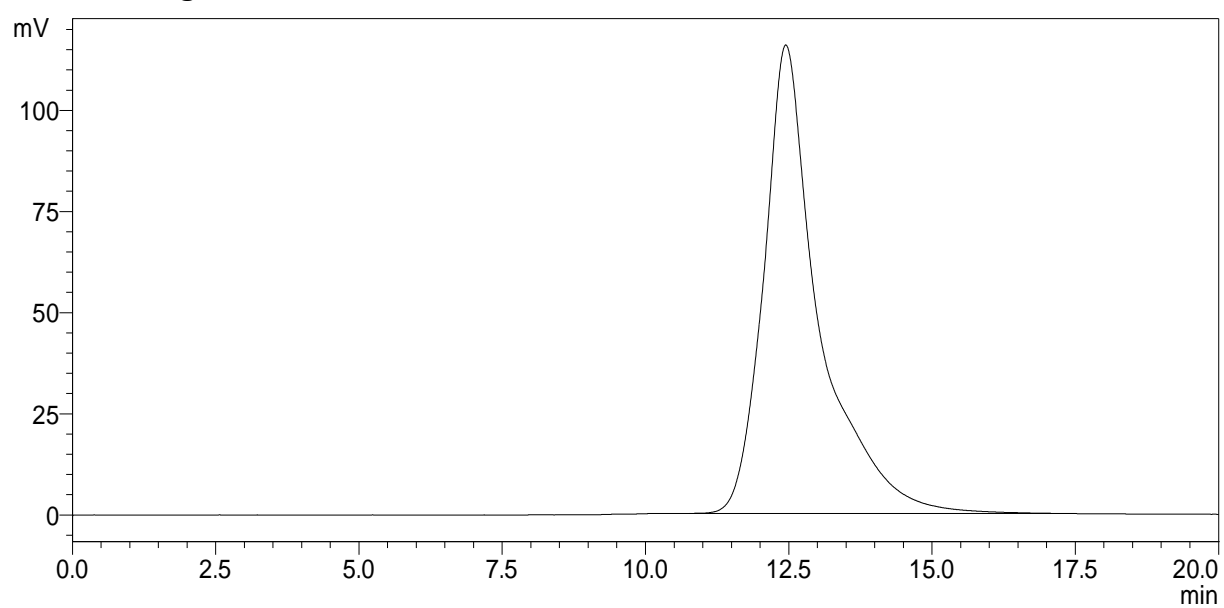**<Peak List>**

Detector A Ch2 680 nm

| Peak# | Ret. time | Area    | Hight  | Conc. | Area%   |
|-------|-----------|---------|--------|-------|---------|
| 1     | 12.448    | 7782431 | 115829 | 0.000 | 100.000 |
| Sum   |           | 7782431 | 115829 |       | 100.000 |

Figure S38. HPLC chart of **1d**.

**<Sample>**

Sample name : **1e**  
 Sample ID : takagi  
 File name : 20170534.lcd  
 Method : SubPc.lcm  
 :  
 Sample vol : 1-1  
 Date Meas. : 1000 uL  
 Date Anal. : 2017/06/07 17:36:20 :  
 2017/06/07 17:56:22

**<Chromatogram>**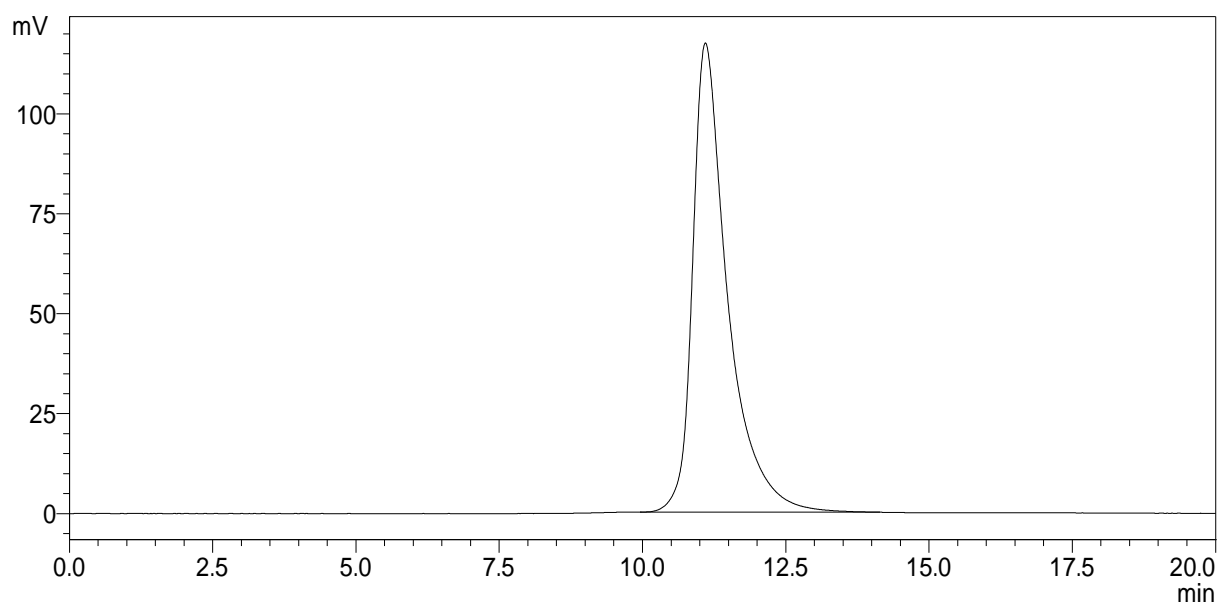**<Peak List>**

Detector A Ch2 680 nm

| Peak# | Ret. time | Area    | Hight  | Conc. | Area%   |
|-------|-----------|---------|--------|-------|---------|
| 1     | 11.099    | 5005683 | 117405 | 0.000 | 100.000 |
| Sum   |           | 5005683 | 117405 |       | 100.000 |

Figure S39. HPLC chart of **1e**.

## &lt;Sample&gt;

Sample name : **1f**  
 Sample ID : takagi  
 File name : 20170535.lcd  
 Method : SubPc.lcm  
 :  
 Sample vol : 1-1  
 Date Meas. : 1000 uL  
 Date Anal. : 2017/06/07 18:01:46 :  
 2017/06/07 18:21:48

## &lt;Chromatogram&gt;

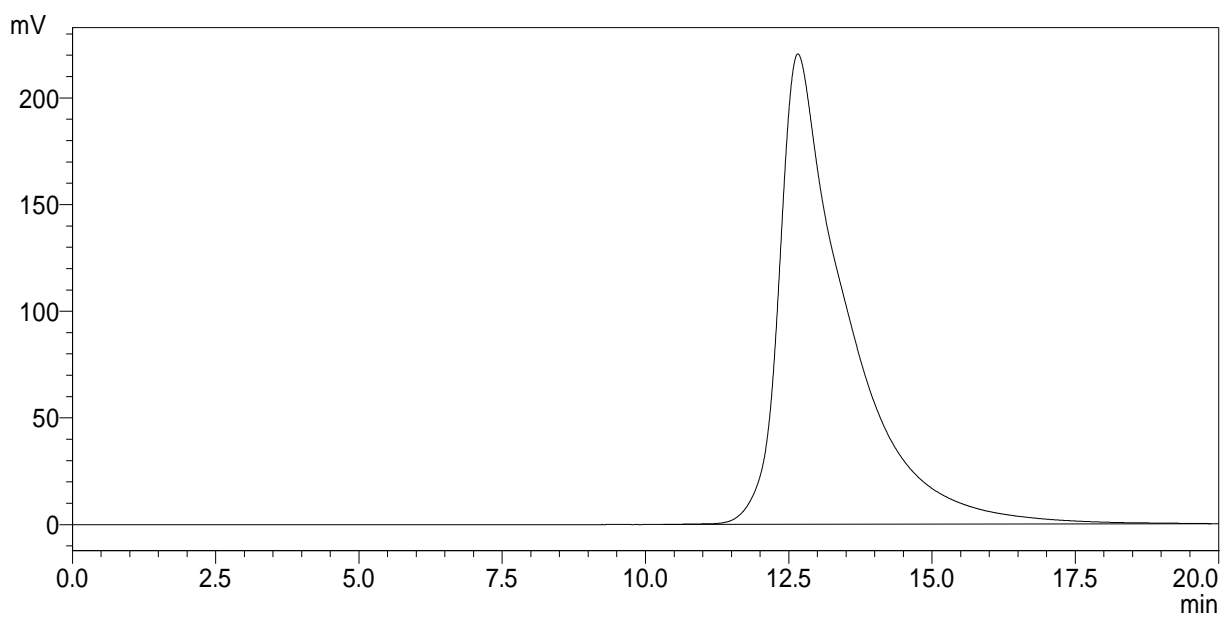

## &lt;Peak List&gt;

Detector A Ch2 680 nm

| Peak# | Ret. time | Area     | Hight  | Conc. | Area%   |
|-------|-----------|----------|--------|-------|---------|
| 1     | 10.600    | 1599     | 116    | 0.000 | 0.009   |
| 2     | 12.660    | 18247509 | 220500 | 0.000 | 99.991  |
| Sum   |           | 18249108 | 220616 |       | 100.000 |

Figure S40. HPLC chart of **1f**.

## &lt;Sample&gt;

Sample name : **2a**  
Sample ID : takagi  
File name : 20170543.lcd  
Method : SubPc.lcm  
:  
Sample vol : 1-1  
Date Meas. : 1000 uL  
Date Anal. : 2017/06/08 14:35:06  
: 2017/06/08 15:05:08

## &lt;Chromatogram&gt;

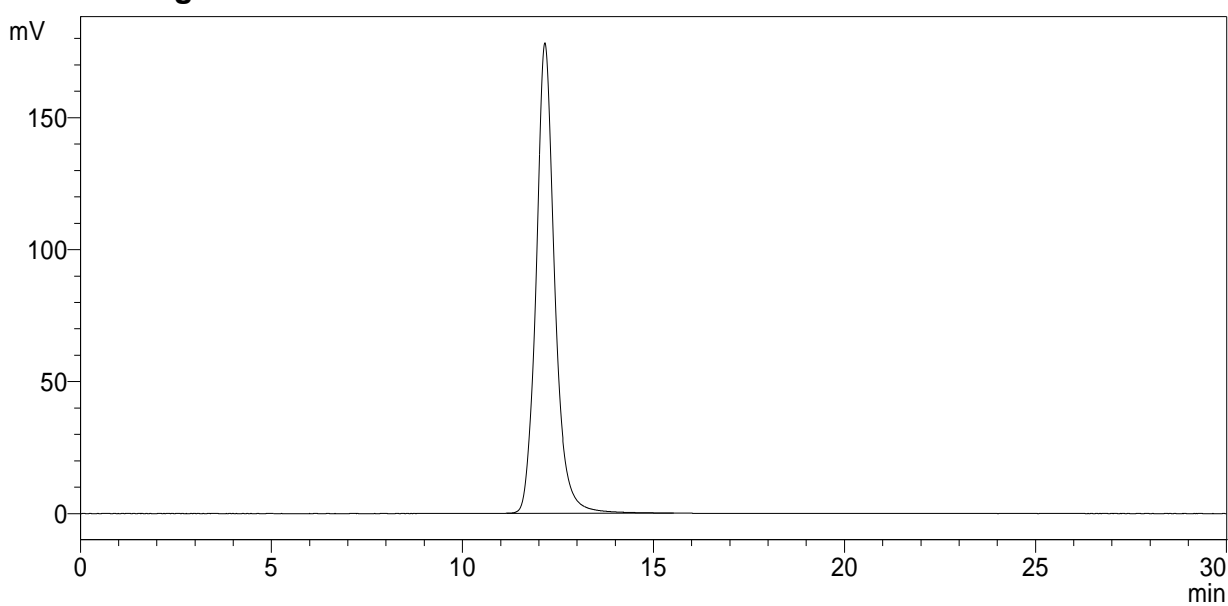

## &lt;Peak List&gt;

Detector A Ch2 680 nm

| Peak# | Ret. time | Area    | Hight  | Conc. | Area%   |
|-------|-----------|---------|--------|-------|---------|
| 1     | 12.156    | 5983049 | 178217 | 0.000 | 100.000 |
| Sum   |           | 5983049 | 178217 |       | 100.000 |

Figure S41. HPLC chart of **2a**.

## &lt;Sample&gt;

Sample name : **2b**  
 Sample ID : takagi  
 File name : 20170537.lcd  
 Method : SubPc.lcm  
 :  
 Sample vol : 1-1  
 Date Meas. : 1000 uL  
 Date Anal. : 2017/06/08 11:13:48  
 : 2017/06/08 11:33:51

## &lt;Chromatogram&gt;

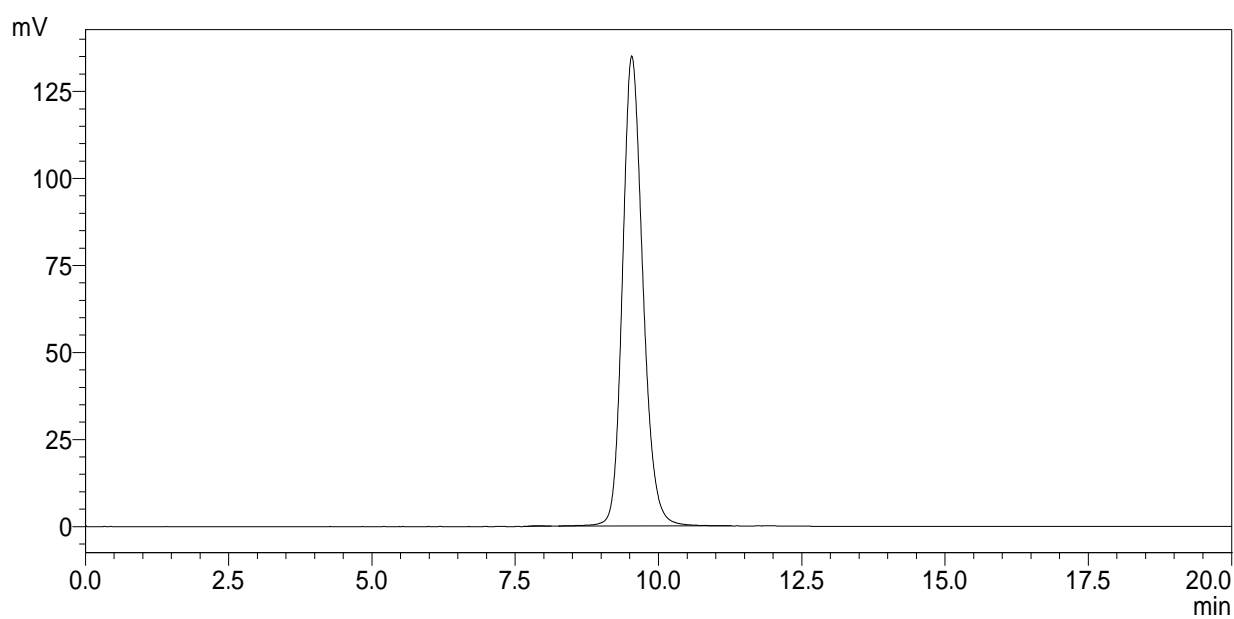

## &lt;Peak List&gt;

Detector A Ch2 680 nm

| Peak# | Ret. time | Area    | Hight  | Conc. | Area%   |
|-------|-----------|---------|--------|-------|---------|
| 1     | 7.870     | 2564    | 179    | 0.000 | 0.077   |
| 2     | 9.535     | 3343790 | 135032 | 0.000 | 99.923  |
| Sum   |           | 3346354 | 135211 |       | 100.000 |

Figure S42. HPLC chart of **2b**.



**<Sample>**

Sample name : **2c**  
 Sample ID : takagi  
 File name : 20170538.lcd  
 Method : SubPc.lcm  
 :  
 Sample vol : 14  
 Date Meas. : 1000 uL  
 Date Anal. : 2017/06/08 11:38:08  
 : 2017/06/08 11:58:10

**<Chromatogram>**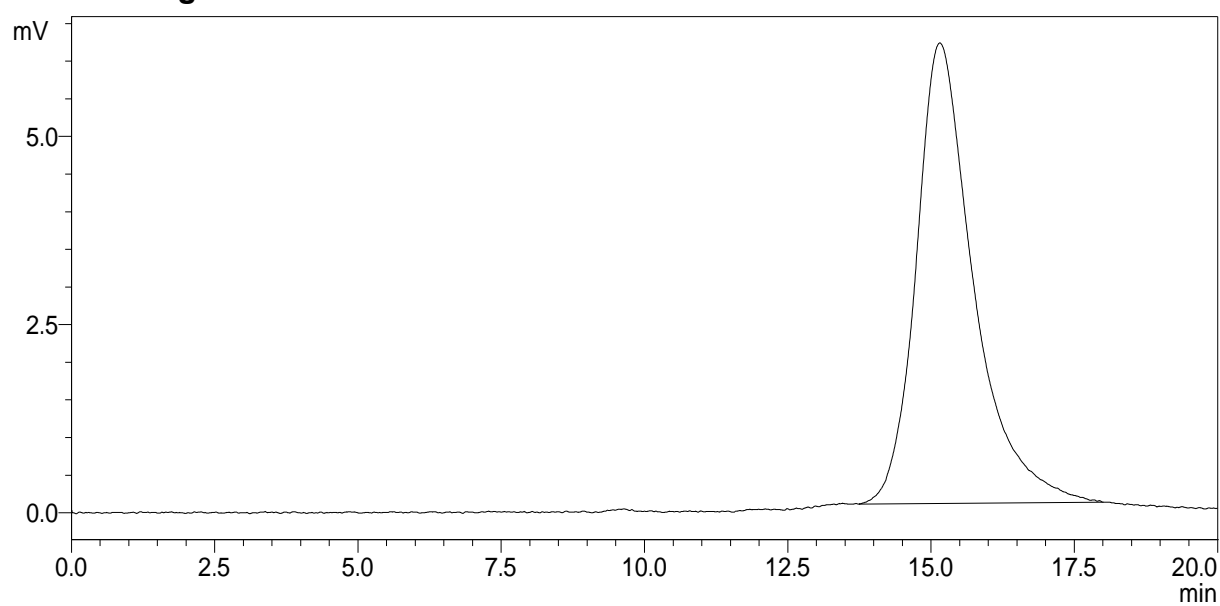**<Peak List>**

Detector A Ch2 670 nm

| Peak# | Ret. time | Area   | Hight | Conc. | Area%   |
|-------|-----------|--------|-------|-------|---------|
| 1     | 15.152    | 425471 | 6116  | 0.000 | 100.000 |
| Sum   |           | 425471 | 6116  |       | 100.000 |

Figure S43. HPLC chart of **2c**.

**<Sample>**

Sample name : **2d**  
 Sample ID : takagi  
 File name : 20170548.lcd  
 Method : SubPc.lcm  
 .  
 Sample vol : 14  
 Date Meas. : 1000 uL  
 Date Anal. : 2017/06/08  
 20:22:34 : 2017/06/08  
 20:42:35

**<Chromatogram>**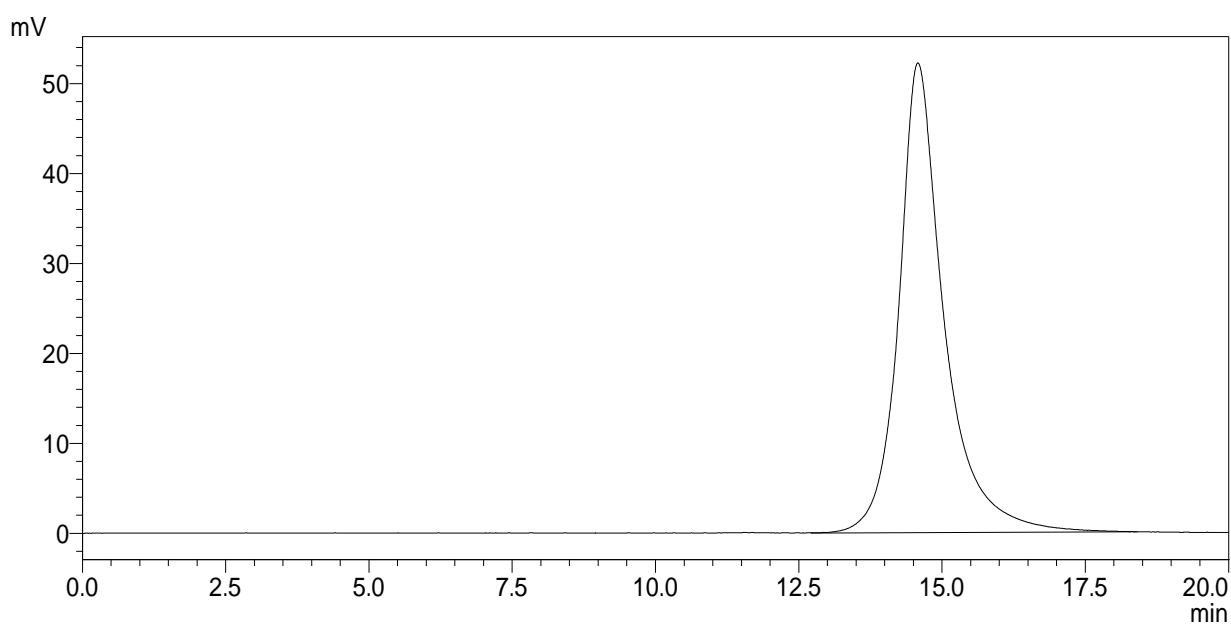**<Peak List>**

Detector A Ch2 670 nm

| Peak# | Ret. time | Area    | Hight | Conc. | Area%   |
|-------|-----------|---------|-------|-------|---------|
| 1     | 14.579    | 2879899 | 52220 | 0.000 | 100.000 |
| Sum   |           | 2879899 | 52220 |       | 100.000 |

Figure S44. HPLC chart of **2d**.

## &lt;Sample&gt;

Sample name : **2e**  
 Sample ID : takagi  
 File name : 20170540.lcd  
 Method : SubPc.lcm  
 :  
 Sample vol : 14  
 Date Meas. : 1000 uL  
 Date Anal. : 2017/06/08  
 12:25:54 : 2017/06/08  
 12:45:57

## &lt;Chromatogram&gt;

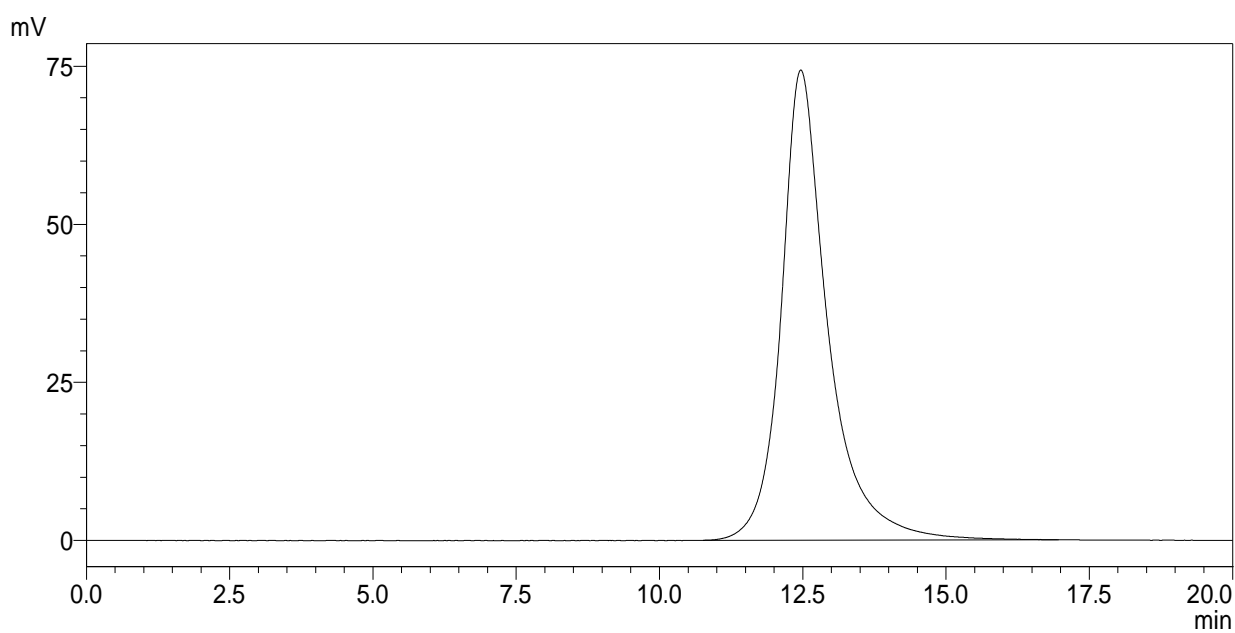

## &lt;Peak List&gt;

Detector A Ch2 670 nm

| Peak# | Ret. time | Area    | Hight | Conc. | Area%   |
|-------|-----------|---------|-------|-------|---------|
| 1     | 12.465    | 4231981 | 74397 | 0.000 | 100.000 |
| Sum   |           | 4231981 | 74397 |       | 100.000 |

Figure S45. HPLC chart of **2e**.

**<Sample>**

Sample name : **2f**  
 Sample ID : takagi  
 File name : 20170544.lcd  
 Method : SubPc.lcm  
 .  
 Sample vol : 14  
 Date Meas. : 1000 uL  
 Date Anal. : 2017/06/08 15:28:59 :  
 2017/06/08 15:59:01

**<Chromatogram>**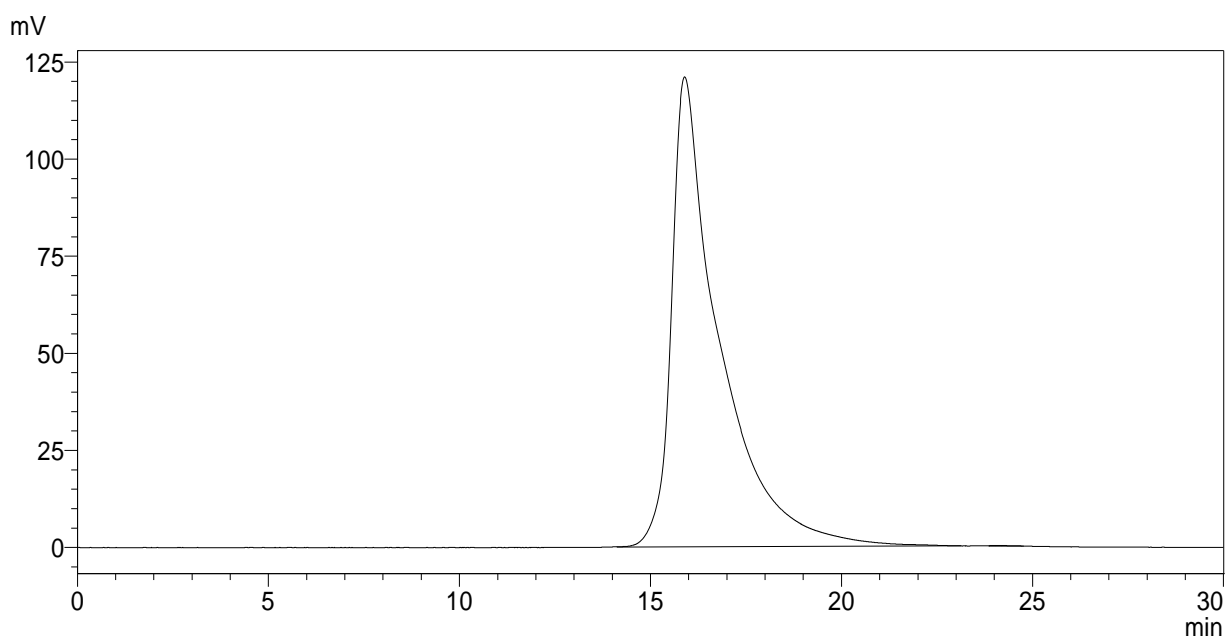**<Peak List>**

Detector A Ch2 670 nm

| Peak# | Ret. time | Area     | Hight  | Conc. | Area%   |
|-------|-----------|----------|--------|-------|---------|
| 1     | 15.898    | 10609212 | 121020 | 0.000 | 99.954  |
| 2     | 23.967    | 1157     | 114    | 0.000 | 0.011   |
| 3     | 24.073    | 1307     | 129    | 0.000 | 0.012   |
| 4     | 24.250    | 2427     | 117    | 0.000 | 0.023   |
| Sum   |           | 10614102 | 121380 |       | 100.000 |

Figure S46. HPLC chart of **2f**.

**<Sample>**

Sample name : **2g**  
 Sample ID : takagi  
 File name : 20170547.lcd  
 Method : SubPc.lcm  
 :  
 Sample vol : 14  
 Date Meas. : 1000 uL  
 Date Anal. : 2017/06/08 19:26:51  
 : 2017/06/08 19:46:53

**<Chromatogram>**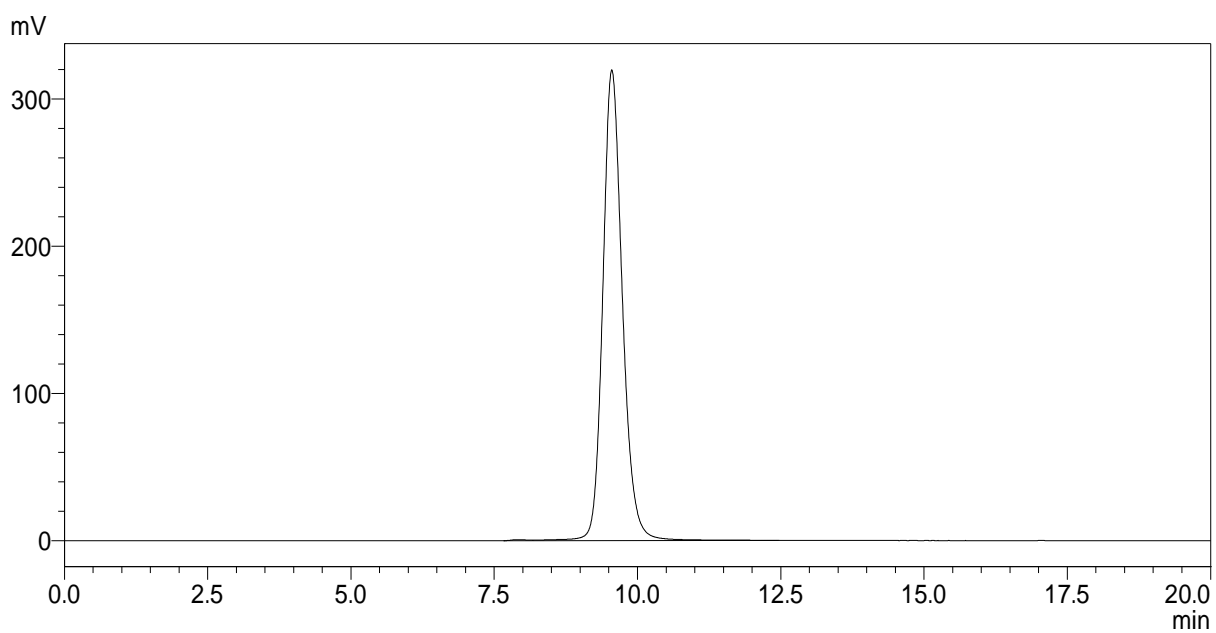**<Peak List>**

Detector A Ch2 680 nm

| Peak# | Ret. time | Area    | Hight  | Conc. | Area%   |
|-------|-----------|---------|--------|-------|---------|
| 1     | 7.898     | 12560   | 636    | 0.000 | 0.165   |
| 2     | 9.553     | 7616004 | 319771 | 0.000 | 99.835  |
| Sum   |           | 7628564 | 320407 |       | 100.000 |

Figure S47. HPLC chart of **2g**.

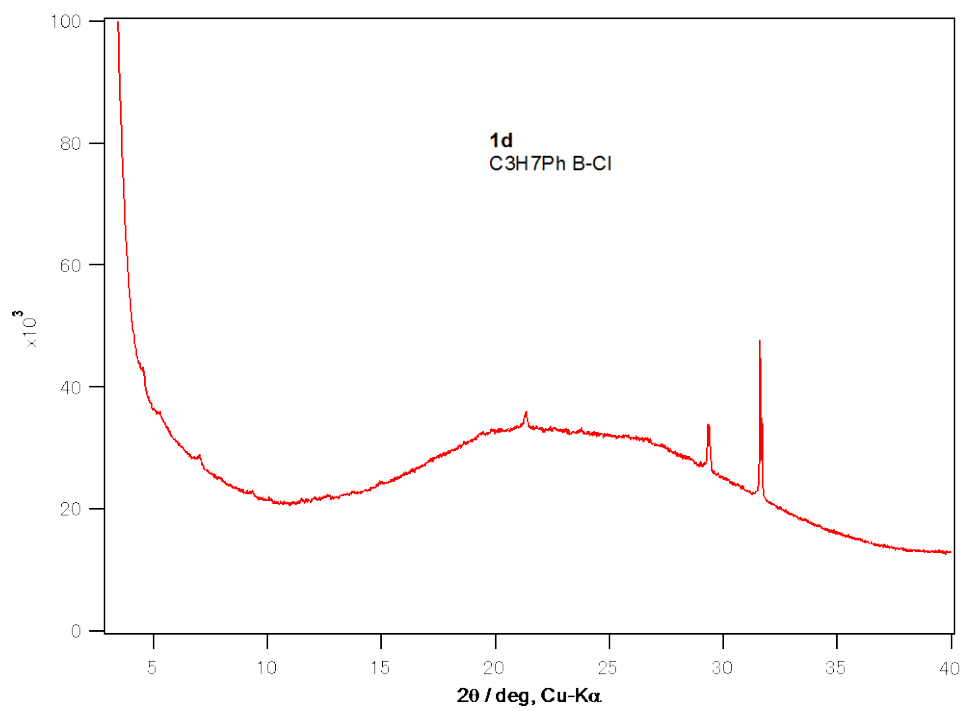

Figure S48 Powder X-ray diffraction patterns of **1d**.

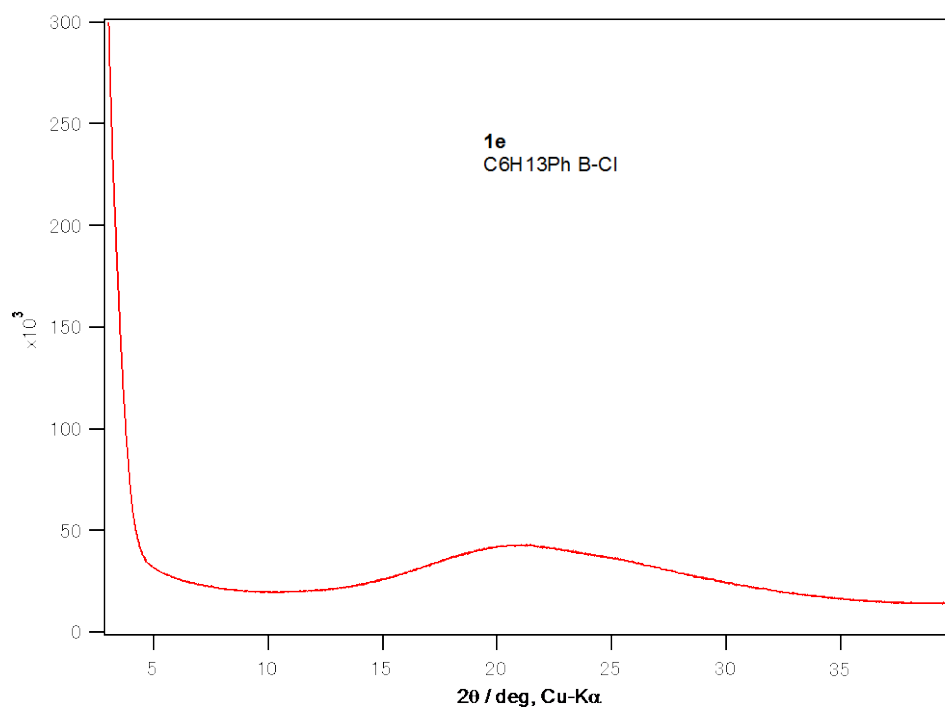

Figure S49 Powder X-ray diffraction patterns of **1e**.

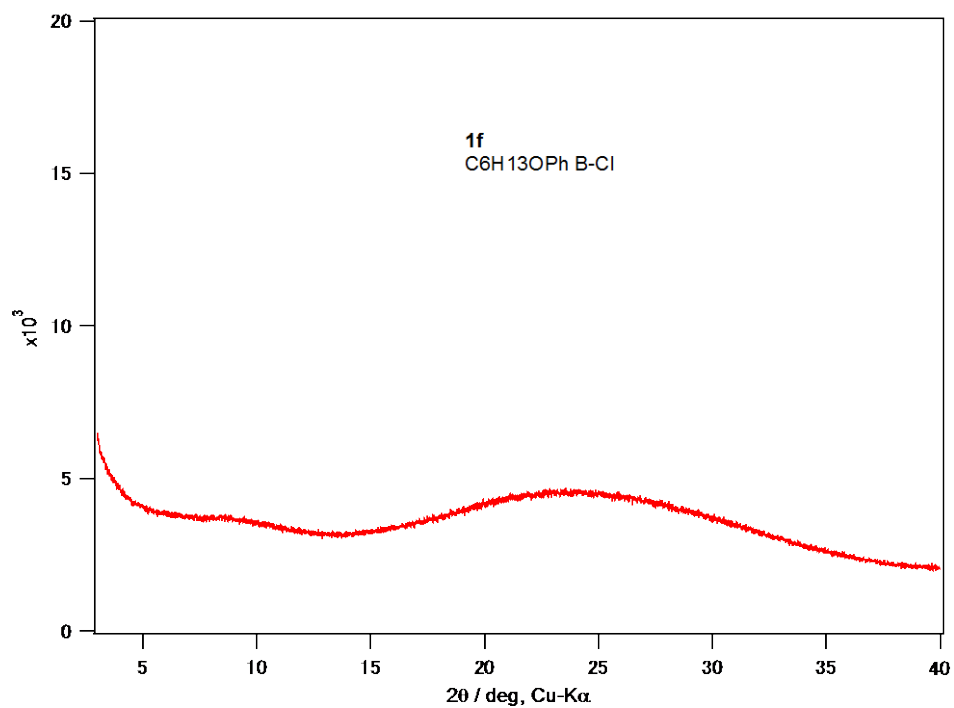

Figure S50 Powder X-ray diffraction patterns of **1f**.



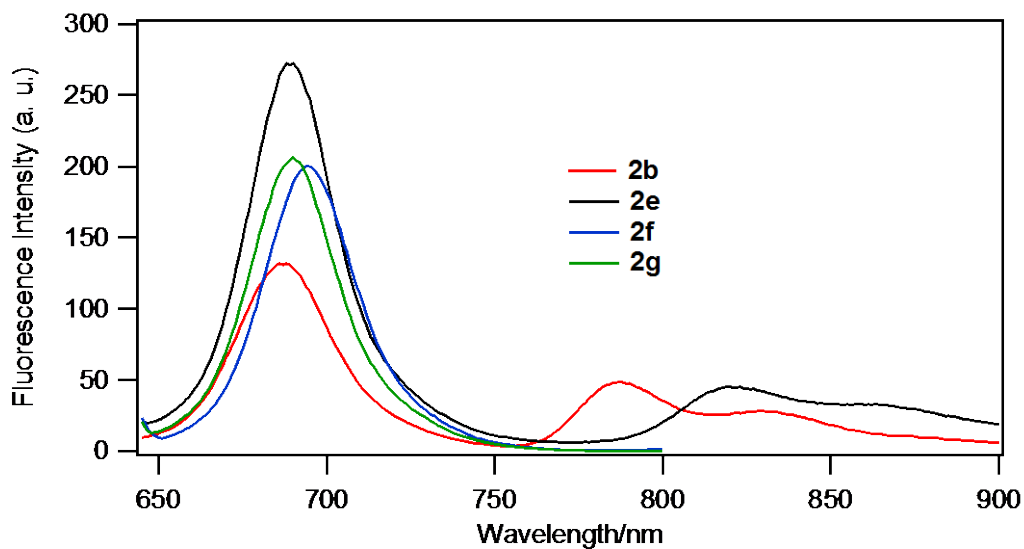

Figure S51. Fluorescence spectra of **2b**, **2e**, **2f** and **2g** in CH<sub>2</sub>Cl<sub>2</sub>-DMSO (1:1. v/v).

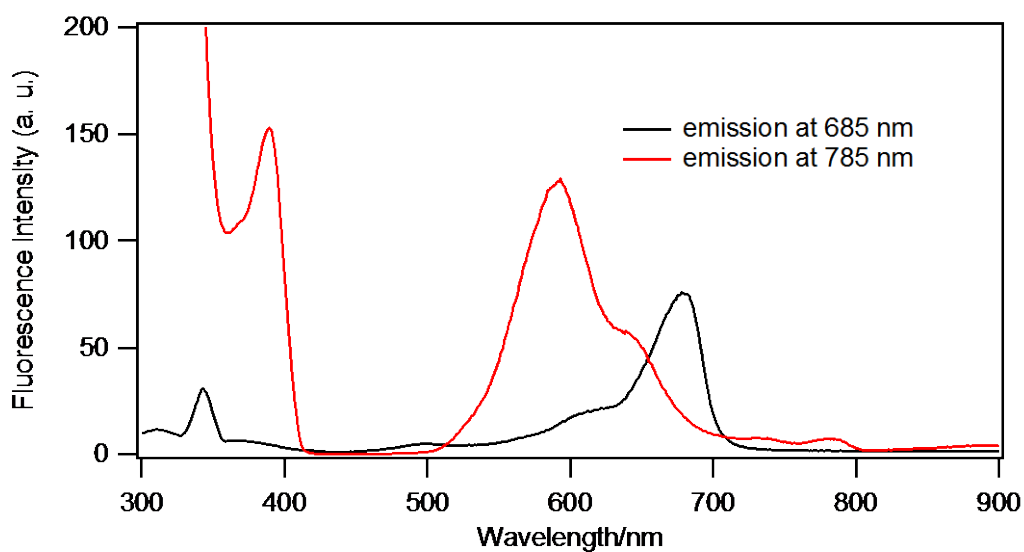

Figure S52. Excitation spectra of **2b** in CH<sub>2</sub>Cl<sub>2</sub>-DMSO (1:1. v/v).

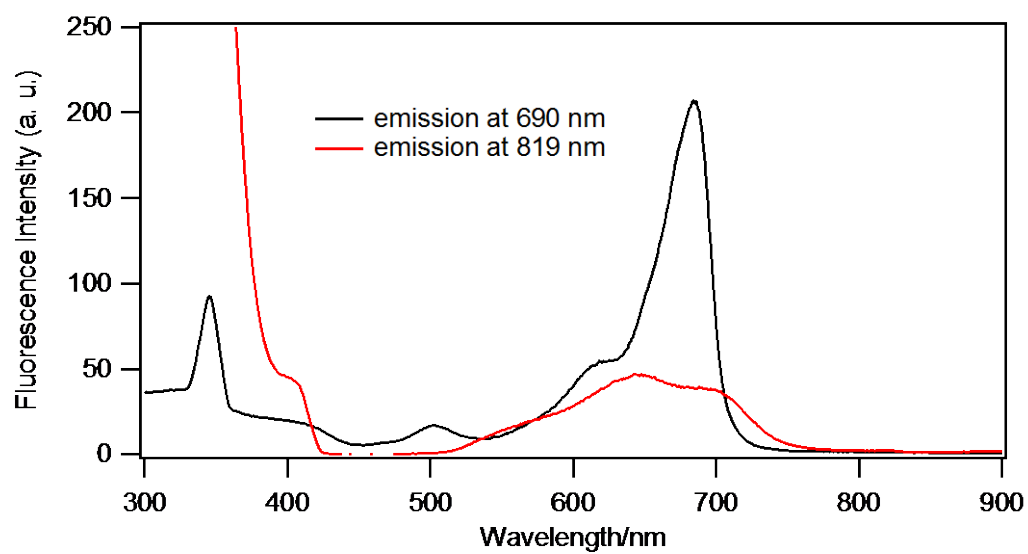

Figure S52. Excitation spectra of **2e** in CH<sub>2</sub>Cl<sub>2</sub>-DMSO (1:1, v/v).
